# Supplementary material
Source: PubMed Central journal article supplement (PMC6625786)

# Improved synthesis of icosahedral carboranes containing exopolyhedral B–C and C–C bonds

Kierstyn P. Anderson, Harrison A. Mills, Chantel Mao, Kent O. Kirlikovali, Jonathan C. Axtell, Arnold L. Rheingold, and Alexander M. Spokoyny\*

<sup>a</sup>*Department of Chemistry & Biochemistry, University of California, 607 Charles E. Young Drive East, Los Angeles, California 90095, United States*

<sup>b</sup>*Department of Chemistry, University of California, San Diego, 9500 Gilman Drive, La Jolla, CA 92093, United States*

<sup>c</sup>*California NanoSystems Institute (CNSI), University of California, Los Angeles, California 90095, United States*

\*E-mail: [spokoyny@chem.ucla.edu](mailto:spokoyny@chem.ucla.edu)

Supporting Information (SI)

## Contents

|                                                          |     |
|----------------------------------------------------------|-----|
| 1. General Considerations .....                          | S2  |
| 2. Instrumentation .....                                 | S3  |
| 3. Experimental .....                                    | S3  |
| 1. Precursor Synthesis .....                             | S3  |
| 2. Kumada-type Cross-Coupling with Iodo-carboranes ..... | S3  |
| 3. SNAr with Carborane and (Hetero)arenes .....          | S5  |
| 4. Product Details .....                                 | S7  |
| 4. References .....                                      | S11 |
| 5. Crystal Structure Data .....                          | S12 |
| 6. Spectroscopic Data .....                              | S24 |

### 1. General Considerations

*Meta*-C<sub>2</sub>B<sub>10</sub>H<sub>12</sub> (Katchem), *ortho*-C<sub>2</sub>B<sub>10</sub>H<sub>12</sub> (Boron Specialties), were sublimed prior to use. XPhos (Sigma-Aldrich) and SPhos (Ark Pharm) were used as received. XPhos-Pd-G3 and SPhos-Pd-G3 were prepared according to literature procedures<sup>1</sup>. Iodomethane (Sigma-Aldrich), Bromoethane (Sigma-Aldrich), Iodobenzene (Sigma-Aldrich), 2-Bromothiophene (Oakwood), and 4-Bromobenzotrifluoride (Oakwood) were stored over molecular sieves in ambient conditions and used as is. Iodotoluene (Sigma-Aldrich) was used as received. Grignard reagents were prepared by the dropwise addition of alkyl or aryl halides to an excess of Magnesium chips (Sigma-Aldrich) in anhydrous ether and left to stir overnight at room temperature (MeMgI and EtMgBr were instead stirred at reflux overnight) and filtered before use. The concentration of the Grignard reagents was determined by titration of iodine (~63.5 mg in 5 mL of anhydrous THF) with a 0.20 mL aliquot until the equivalence point was observed. Fluoronaphthalene (Oakwood Chemical) was stirred over CaH<sub>2</sub> then distilled under vacuum and stored in an N<sub>2</sub>-filled glovebox. Isopropoxytrimethylsilane (Sigma-Aldrich) and solid KHMDS (Sigma-Aldrich) were stored in an N<sub>2</sub>-filled glovebox and used as received. KHMDS solution (Sigma-Aldrich, anhydrous, 1M in THF) was used as received. 6-fluoroquinoline (Oakwood Chemical), 2-chloropyridine (Oakwood Chemical), 2-fluoropyridine (Oakwood Chemical) and 2,6-difluoropyridine (Oakwood Chemical) were stored over 3 Å molecular sieves in ambient conditions. Perfluorobenzene (Oakwood Chemical) and 2,2'-bipyridine (Oakwood Chemical) were stored in ambient conditions and used as received. Deuterated solvents were purchased from Cambridge Isotope Laboratories and used as received. Glass-backed Silica Gel 60 GLA TLC plates were purchased from Fisher Scientific. Silica used for flash column chromatography was SiliaFlash® G60 60-200 μm (70-230 mesh) purchased from Silicycle.

All experiments were performed air and moisture free under an atmosphere of nitrogen using standard Schlenk techniques. Anhydrous dioxane (Sigma-Aldrich) was used as received. THF, diethyl ether, and methyl *tert*-butyl ether (MTBE) used for reactions were purified and dried using a Grubbs column. All post-Schlenk work-up and characterization was performed under ambient conditions. The “ambient conditions” for this manuscript refer to room temperature (20 - 25°C) and uncontrolled laboratory air. Thin layer chromatography (TLC) samples for carborane-containing compounds were stained with 1 wt. % PdCl<sub>2</sub> in 6M HCl and developed with heat.

## 2. Instrumentation

$^1\text{H}$ ,  $^{13}\text{C}\{^1\text{H}\}$ ,  $^{11}\text{B}$ ,  $^{11}\text{B}\{^1\text{H}\}$ ,  $^{19}\text{F}$ , NMR spectra were recorded on either a Bruker DRX500, Bruker AV500 or Bruker AVIII 400 spectrometer in ambient conditions unless stated otherwise. MestreNova v6.0.2-5475 software was used to process the FID data and visualize the spectra.  $^1\text{H}$  and  $^{13}\text{C}$  NMR spectra were referenced to residual solvent resonances in deuterated solvents ( $\text{CDCl}_3$ :  $^1\text{H}$ , 7.26 ppm;  $^{13}\text{C}$ , 77.16 ppm. Acetone- $d_6$ :  $^1\text{H}$ , 2.05 ppm;  $^{13}\text{C}$ , 29.84 ppm. Note: due to high humidity  $\text{H}_2\text{O}$  resonances are often present).  $^{11}\text{B}$  and  $^{11}\text{B}\{^1\text{H}\}$  NMR spectra were referenced externally to  $\text{Et}_2\text{O}\cdot\text{BF}_3$  ( $\delta = 0$  ppm).  $^{19}\text{F}$  NMR spectra were referenced externally to fluorobenzene ( $\delta = -113.15$  ppm).

Gas Chromatography Mass Spectrometry (GC-MS) measurements were carried out using an Agilent Model 7693 Autosampler, 7890B Gas Chromatograph, and 7250 Q-TOF Mass Selective Detector in the Electron Ionization mode. Sample injection was carried out on an Agilent HP5-MS column with dimensions 30 m x 250  $\mu\text{m}$  x 0.25  $\mu\text{m}$ . Ultra High Purity Grade He (Airgas) was used as carrier gas. Data collection and analysis were performed using Mass Hunter Acquisition and Qualitative Analysis software (Agilent).

## 3. Experimental

### 1. Precursor Synthesis

9-I-1,2-dicarba-*closo*-dodecaborane (9-I-oCB)<sup>2</sup>, 9-I-1,7-dicarba-*closo*-dodecaborane (9-I-mCB)<sup>2</sup>, 9,12-I<sub>2</sub>-1,2-dicarba-*closo*-doedecaborane (9,12-I<sub>2</sub>-oCB)<sup>3</sup>, 9,12-Br<sub>2</sub>-1,2-dicarba-*closo*-doedecaborane (9,12-Br<sub>2</sub>-oCB)<sup>2</sup>, and 9-Br, 10-I-1,7-dicarba-*closo*-dodecaborane (9-Br-10-I-mCB)<sup>2</sup> were synthesized according to or adapted from previously reported procedures. All characterization data are consistent with those previous reports.

### 2. Kumada-type Cross-Coupling with Iodo-carboranes

#### Optimization of Kumada Cross-Coupling Protocol

9,12-I<sub>2</sub>-oCB (40 mg, 0.1 mmol) or 9,12-Br<sub>2</sub>-oCB (30 mg, 0.1 mmol), catalyst (0.002 mmol, 2 mol%), phosphine ligand (0.002 mmol, 2 mol%), and additive (if applicable, 0.002 mmol, 2 mol%) were added to an oven-dried reaction tube with a PTFE septum cap. The reaction tube was evacuated and backfilled with  $\text{N}_2$  three times before transferring into an  $\text{N}_2$ -filled glovebox. Under an inert atmosphere, anhydrous solvent (0.6 mL) was added before the dropwise addition of ethylmagnesium bromide in diethyl ether (~2 M, 4.2-5.0 eq.). The reaction mixture was heated and the reaction progress was monitored by GC-MS after 2.5 hours.

**Table S1.** Kumada coupling optimizations

| Entry # | Substrate           | Ligand | Grig. Eq. | Additive | Solvent | Temp. | % Conversion by GC-MS |
|---------|---------------------|--------|-----------|----------|---------|-------|-----------------------|
| 1       | I <sub>2</sub> -oCB | XPhos  | 5.0 eq.   | CuI      | THF     | 75 °C | 2                     |

|   |                      |       |        |       |         |       |    |
|---|----------------------|-------|--------|-------|---------|-------|----|
| 2 | I <sub>2</sub> -oCB  | XPhos | 4.2 eq | ----- | Dioxane | 65 °C | 30 |
| 3 | I <sub>2</sub> -oCB  | XPhos | 4.2 eq | ----- | Dioxane | 75 °C | 89 |
| 4 | I <sub>2</sub> -oCB  | SPhos | 4.2 eq | ----- | Dioxane | 75 °C | 90 |
| 5 | Br <sub>2</sub> -oCB | XPhos | 4.2 eq | ----- | Dioxane | 75 °C | 0  |

**Note:** Although most entries and products utilize XPhos-Pd-G3 and XPhos ligand catalytic system, Entry 4 as well as products **1A<sup>1</sup>** and **1D<sup>1</sup>** provide evidence to suggest that SPhos-Pd-G3 and SPhos ligand would be competent in these transformations. When using EtMgBr, only slight variations in isolated yields were observed and reaction times remained consistent between using XPhos or SPhos.

#### Procedure for Kumada Cross-Coupling with 9,12-I<sub>2</sub>-oCB

9,12-I<sub>2</sub>-oCB (0.5-1 mmol), L-Pd-G3 (2 mol%), and L (2 mol%) were added to an oven-dried Schlenk flask and evacuated/backfilled with N<sub>2</sub> three times before leaving under an inert atmosphere. Using a syringe, anhydrous dioxane (6 mL) was added to dissolve all solids. Next the Grignard reagent (~2 M, 2.1-4.2 mmol, 4.2 eq.) was added dropwise to this stirring solution at room temperature. The reaction mixture was then stirred at 75 °C until the reaction was determined to be complete by GC-MS. The reaction mixture was then diluted with Et<sub>2</sub>O (~20 mL) and the excess Grignard was quenched by the addition of H<sub>2</sub>O. The solution was transferred to a separatory funnel and the aqueous layer was extracted with Et<sub>2</sub>O (3 x 20 mL). During the extraction, brine (~5 mL) was added to improve separation between organic and aqueous layers. The organic fractions were combined and dried with MgSO<sub>4</sub>, then filtered into a round-bottomed flask. The solvent was removed under reduced pressure to yield the crude product as a colored oil or solid. The crude product was dry loaded onto silica and purified using silica gel column chromatography to yield the desired product (see product details for exact purification conditions).

#### Procedure for Kumada Cross-Coupling with 9-I-oCB, 9-I-mCB, or 9-Br-10-I-mCB

Mono-iodinated carborane (9-I-oCB, 9-I-mCB, or 9-Br-10-I-mCB; 0.5-1 mmol), L-Pd-G3 (1-1.5 mol%), and L (1-1.5 mol%) were added to an oven-dried Schlenk flask and evacuated/backfilled with N<sub>2</sub> three times before leaving under an inert atmosphere. Using a syringe, anhydrous dioxane (6 mL) was added to dissolve all solids before the dropwise addition of the chosen Grignard reagent (~2 M, 3.2 mmol, 3.2 eq.) to the stirring solution at room temperature. The reaction mixture was then left to stir at 75 °C until the reaction was confirmed complete by GC-MS. Once the reaction was complete, the solution was diluted with Et<sub>2</sub>O (~20 mL) and the excess Grignard was quenched by the addition of H<sub>2</sub>O. The solution was transferred to a separatory funnel and the aqueous layer was extracted with Et<sub>2</sub>O (3 x 20 mL). During the extraction, brine (~5 mL) was added to improve separation between organic and aqueous layers. The organic fractions were combined and dried with MgSO<sub>4</sub>, the filtered into a round-bottomed flask. The solvent was removed under reduced pressure to yield the crude product as a colored oil or solid. The crude product was dry loaded onto silica and purified using silica gel flash column chromatography to yield the desired product (see product details for exact purification conditions).

**Table S2.** Masses and reaction times for the synthesis of products **1A-1J**.

| Product               | Iodocarborane                                  | L-Pd-G3                             | L                            | Time  |
|-----------------------|------------------------------------------------|-------------------------------------|------------------------------|-------|
| <b>1A</b>             | 9,12-I <sub>2</sub> -oCB<br>(394 mg, 1.0 mmol) | XPhos-Pd-G3<br>(16.8 mg, 0.02 mmol) | XPhos<br>(9.4 mg, 0.02 mmol) | 2.5 h |
| <b>1A<sup>1</sup></b> | 9,12-I <sub>2</sub> -oCB<br>(197 mg, 0.5 mmol) | SPhos-Pd-G3<br>(7.8 mg, 0.01 mmol)  | SPhos<br>(4.1 mg, 0.01 mmol) | 2.5 h |



|                       |                                                |                                     |                               |        |
|-----------------------|------------------------------------------------|-------------------------------------|-------------------------------|--------|
| <b>1B</b>             | 9,12-I <sub>2</sub> -oCB<br>(394 mg, 1.0 mmol) | XPhos-Pd-G3<br>(16.8 mg, 0.02 mmol) | XPhos<br>(9.4 mg, 0.02 mmol)  | 1.5 h  |
| <b>1C</b>             | 9,12-I <sub>2</sub> -oCB<br>(394 mg, 1.0 mmol) | XPhos-Pd-G3<br>(16.8 mg, 0.02 mmol) | XPhos<br>(9.4 mg, 0.02 mmol)  | 3.0 h  |
| <b>1D</b>             | 9-I-oCB<br>(270 mg, 1.0 mmol)                  | XPhos-Pd-G3<br>(12.6 mg, 0.01 mmol) | XPhos<br>(7.1 mg, 0.01 mmol)  | 2.0 h  |
| <b>1D<sup>I</sup></b> | 9-I-oCB<br>(135 mg, 0.5 mmol)                  | SPhos-Pd-G3<br>(5.9 mg, 0.005 mmol) | SPhos<br>(3.2 mg, 0.005 mmol) | 2.0 h  |
| <b>1E</b>             | 9-I-oCB<br>(270 mg, 1.0 mmol)                  | XPhos-Pd-G3<br>(8.4 mg, 0.01 mmol)  | XPhos<br>(4.7 mg, 0.01 mmol)  | 0.75 h |
| <b>1F</b>             | 9-I-oCB<br>(270 mg, 1.0 mmol)                  | XPhos-Pd-G3<br>(8.4 mg, 0.01 mmol)  | XPhos<br>(4.7 mg, 0.01 mmol)  | 2.0 h  |
| <b>1G</b>             | 9-I-oCB<br>(270 mg, 1.0 mmol)                  | XPhos-Pd-G3<br>(8.4 mg, 0.01 mmol)  | XPhos<br>(4.7 mg, 0.01 mmol)  | 4.0 h  |
| <b>1H</b>             | 9-I-mCB<br>(270 mg, 1.0 mmol)                  | XPhos-Pd-G3<br>(8.4 mg, 0.01 mmol)  | XPhos<br>(4.7 mg, 0.01 mmol)  | 1.0 h  |
| <b>1I</b>             | 9-Br-10-I-mCB<br>(350 mg, 1.0 mmol)            | XPhos-Pd-G3<br>(8.4 mg, 0.01 mmol)  | XPhos<br>(4.7 mg, 0.01 mmol)  | 1.0 h  |
| <b>1J</b>             | 9-Br-10-I-mCB<br>(350 mg, 1.0 mmol)            | XPhos-Pd-G3<br>(8.4 mg, 0.01 mmol)  | XPhos<br>(4.7 mg, 0.01 mmol)  | 3.0 h  |

### 3. S<sub>N</sub>Ar Conditions with Carborane and (Hetero)arenes

#### Optimization of S<sub>N</sub>Ar Protocol

*O*-carborane (oCB) (29 mg, 0.2 mmol, 1 eq.) was added to an oven-dried reaction tube and sealed with a PTFE septum cap. The reaction tube was evacuated and backfilled with N<sub>2</sub> three times and transferred into an N<sub>2</sub>-filled glovebox. Under an inert atmosphere, base (0.2-0.6 mmol) and solvent (0.6 mL) were added, and the reaction tube was stirred at room temperature for 30 minutes. 2-chloropyridine (19 μL, 0.2 mmol, 1 eq.) was added dropwise to this solution, and the reaction mixture was stirred at room temperature for 14 hours. Reaction progress was monitored by GC-MS.

**Table S3.** Optimization table for S<sub>N</sub>Ar reactions with 2-chloropyridine.

| Entry | Base              | Base eq. | Solvent | Conc. (M) | % Conversion by GC-MS |
|-------|-------------------|----------|---------|-----------|-----------------------|
| 1     | <sup>t</sup> BuLi | 2        | THF     | 0.33      | 0                     |
| 2     | KHMDS             | 2        | THF     | 0.33      | 92                    |
| 3     | KHMDS             | 1        | THF     | 0.33      | 80                    |
| 4     | KHMDS             | 3        | THF     | 0.33      | 99                    |
| 5     | LiHMDS            | 3        | THF     | 0.33      | 45                    |
| 6     | NaHMDS            | 3        | THF     | 0.33      | 90                    |
| 7     | KHMDS             | 3        | MTBE    | 0.33      | 86                    |
| 8     | KHMDS             | 3        | Ether   | 0.33      | 90                    |
| 9     | KHMDS             | 3        | DME     | 0.33      | 98                    |
| 10    | KHMDS             | 3        | THF     | 0.2       | 100                   |

|    |       |   |     |     |     |
|----|-------|---|-----|-----|-----|
| 11 | KHMDS | 3 | THF | 0.4 | 100 |
|----|-------|---|-----|-----|-----|

### General procedure for C-functionalized carboranes

To an oven-dried reaction vessel equipped with a stir bar and septum, carborane (oCB, mCB, **1E**, or **2A** = **CB**, 0.50-1.50 mmol, 1.0-2.0 eq.), solvent (~2 mL), and KHMDS (0.23-4.50 mmol, 1.0-6.0 eq.) were added. After stirring at room temperature for 30-60 minutes, the aryl halide (0.46-1.50 mmol, 1.0-2.0 eq.) was added to the K<sub>2</sub>[**CB**] solution. The vessel was sealed, and the reaction was stirred for 14 hours at 25-80°C. Reaction progress was monitored *via* GC-MS, and upon completion the reaction was quenched by the addition of sat. Et<sub>3</sub>N·HCl or sat. NaHCO<sub>3</sub>. The resulting biphasic mixture was transferred to a separatory funnel, and the organic and aqueous layers were separated. The aqueous phase was extracted with ethyl acetate (3 x 10 mL), and the organic phases were combined, dried over MgSO<sub>4</sub>, and filtered. The solvent was removed under reduced pressure to yield the crude product, which was then purified using silica gel flash column chromatography to yield the desired product. Specific reaction conditions are listed in Table S4.

**Table S4.** Reaction conditions for S<sub>N</sub>Ar products 2A-2I.

| Product    | Aryl Halide                                          | CB                                | KHMDS              | Solvent           | Temp. (°C) |
|------------|------------------------------------------------------|-----------------------------------|--------------------|-------------------|------------|
| <b>2A</b>  | 2-chloropyridine<br>(70.9 μL, 0.75 mmol)             | oCB<br>(108 mg, 0.75 mmol)        | 449 mg, 2.25 mmol  | THF               | 25         |
| <b>2B</b>  | 6-chloro-2,2'-bipyridine<br>(142 mg, 0.75 mmol)      | oCB<br>(108 mg, 0.75 mmol)        | 449 mg, 2.25 mmol  | THF               | 25         |
| <b>2C*</b> | 6,6'-dichloro-2,2'-bipyridine<br>(169 mg, 0.75 mmol) | oCB<br>(216 mg, 1.5 mmol)         | 898 mg, 4.50 mmol  | MTBE              | 25         |
| <b>2D</b>  | fluoronaphthalene<br>(96.8 mg, 0.75 mmol)            | oCB<br>(108 mg, 0.75 mmol)        | 449 mg, 2.25 mmol  | THF               | 80         |
| <b>2E*</b> | 6-fluoroquinoline<br>(91.3 μL, 0.75 mmol)            | oCB<br>(108 mg, 0.75 mmol)        | 449 mg, 2.25 mmol  | THF               | 80         |
| <b>2F</b>  | 2,6-difluoropyridine<br>(68.1 μL, 0.75 mmol)         | oCB<br>(216 mg, 1.5 mmol)         | 898 mg, 4.50 mmol  | Et <sub>2</sub> O | 25         |
| <b>2G</b>  | 2-fluoropyridine<br>(130 μL, 1.5 mmol)               | mCB<br>(108 mg, 0.75 mmol)        | 449 mg, 2.25 mmol  | Et <sub>2</sub> O | 25         |
| <b>2H*</b> | hexafluorobenzene<br>(53.1 μL, 0.46 mmol)            | <b>2A</b><br>(50.8 mg, 0.23 mmol) | 45.9 mg, 0.23 mmol | DME               | 25         |
| <b>2I</b>  | 2-fluoropyridine<br>(129 μL, 1.5 mmol)               | <b>1E</b><br>(79.1 mg, 0.50 mmol) | 209 mg, 1.05 mmol  | Et <sub>2</sub> O | 25         |

\* = See product details for changes that were made to the General Procedure.

## 4. Product Details

### 9,12-(CH<sub>2</sub>CH<sub>3</sub>)<sub>2</sub>-1,2-dicarba-*closo*-dodecaborane (1A and 1A<sup>1</sup>)

Purification: Hexanes ( $R_f$ : 0.31), 144 mg (72%, average of isolated yields obtained for 1A and 1A<sup>1</sup>), clear liquid

<sup>1</sup>H NMR (400 MHz, CDCl<sub>3</sub>):  $\delta$  3.38 (s, 2H, C<sub>carborane</sub>-H), 2.97 – 1.28 (m, 8H, B<sub>carborane</sub>-H), 0.87 (m, br, 6H, Et-CH<sub>3</sub>), 0.69 (s, br, 4H, Et-CH<sub>2</sub>-B). <sup>11</sup>B NMR (128 MHz, CDCl<sub>3</sub>):  $\delta$  9.14 (s, 2B), -8.97 (d, 2B, <sup>1</sup>J<sub>BH</sub> = 148 Hz), -14.86 (d, 4B, <sup>1</sup>J<sub>BH</sub> = 166 Hz), -16.84 (d, 2B, <sup>1</sup>J<sub>BH</sub> = 200 Hz). <sup>13</sup>C NMR (126 MHz, CDCl<sub>3</sub>):  $\delta$  47.52, 13.38, 8.94 (br). GC-MS *m/z*: 200.2560 (calc. 200.2568)

### 9,12-(CH<sub>3</sub>)<sub>2</sub>-1,2-dicarba-*closo*-dodecaborane (1B)

Purification: Hexanes ( $R_f$ : 0.45), 114 mg (66%), white solid

<sup>1</sup>H NMR (400 MHz, CDCl<sub>3</sub>):  $\delta$  3.34 (s, 2H, C<sub>carborane</sub>-H), 2.96 – 1.24 (m, 8H, B<sub>carborane</sub>-H), 0.20 (s, br, 6H, B-CH<sub>3</sub>). <sup>11</sup>B NMR (128 MHz, CDCl<sub>3</sub>):  $\delta$  7.13 (s, 2B), -7.66 (d, 2B, <sup>1</sup>J<sub>BH</sub> = 148 Hz), -14.14 (d, 4B, <sup>1</sup>J<sub>BH</sub> = 148 Hz), -16.64 (d, 2B, <sup>1</sup>J<sub>BH</sub> = 181 Hz). <sup>13</sup>C NMR (126 MHz, CDCl<sub>3</sub>):  $\delta$  47.38 B-CH<sub>3</sub> not observed due to B-C coupling. GC-MS *m/z*: 172.2252 (calc. 172.2255)

### 9,12-(C<sub>6</sub>H<sub>5</sub>)<sub>2</sub>-1,2-dicarba-*closo*-dodecaborane (1C)

Purification: 3:7 CH<sub>2</sub>Cl<sub>2</sub>:Hexanes + 1% TFA ( $R_f$ : 0.35), 170 mg (57%), white solid

<sup>1</sup>H NMR (400 MHz, (CD<sub>3</sub>)<sub>2</sub>CO):  $\delta$  7.17 (m, 4H), 7.04 (m, 6H), 4.64 (s, 2H, C<sub>carborane</sub>-H), 3.32 – 1.42 (m, 8H, B<sub>carborane</sub>-H). <sup>11</sup>B NMR (128 MHz, (CD<sub>3</sub>)<sub>2</sub>CO):  $\delta$  7.02 (s, 2B), -9.93 (d, 2B, <sup>1</sup>J<sub>BH</sub> = 152 Hz), -14.16 (d, 4B, <sup>1</sup>J<sub>BH</sub> = 166 Hz), -16.42 (d, 2B, <sup>1</sup>J<sub>BH</sub> = 180 Hz). <sup>13</sup>C NMR (126 MHz, CDCl<sub>3</sub>):  $\delta$  132.75, 127.01, 126.76, 50.88. GC-MS *m/z*: 296.2563 (calc. 296.2568)

### 9-CH<sub>2</sub>CH<sub>3</sub>-1,2-dicarba-*closo*-dodecaborane (1D and 1D<sup>1</sup>)

Purification: 2:8 CH<sub>2</sub>Cl<sub>2</sub>:Hexanes ( $R_f$ : 0.57), 126 mg (78%, average of isolated yields obtained for 1D and 1D<sup>1</sup>), clear liquid

<sup>1</sup>H NMR (400 MHz, CDCl<sub>3</sub>):  $\delta$  3.48 (s, 1H, C<sub>carborane</sub>-H), 3.41 (s, 1H, C<sub>carborane</sub>-H), 3.02 – 1.34 (m, 9H, B<sub>carborane</sub>-H), 0.86 (s, br, 3H, Et-CH<sub>3</sub>), 0.72 (s, br, 2H, Et-CH<sub>2</sub>-B). <sup>11</sup>B NMR (128 MHz, CDCl<sub>3</sub>):  $\delta$  9.39 (s, 1B), -2.42 (d, 1B, <sup>1</sup>J<sub>BH</sub> = 163 Hz), -9.24 (d, 2B, <sup>1</sup>J<sub>BH</sub> = 148 Hz), -14.10 – -15.82 (m, 6B). <sup>13</sup>C NMR (126 MHz, CDCl<sub>3</sub>):  $\delta$  53.11, 47.80, 13.45, 10.00 (q, br, <sup>1</sup>J<sub>CB</sub> = 60.00 Hz). GC-MS *m/z*: 172.2241 (calc. 172.2252)

### 9-CH<sub>3</sub>-1,2-dicarba-*closo*-dodecaborane (1E)

Purification: 2:8 CH<sub>2</sub>Cl<sub>2</sub>:Hexanes (**R<sub>f</sub>**: 0.50), 134 mg (86%), white solid

**<sup>1</sup>H NMR (400 MHz, CDCl<sub>3</sub>):** δ 3.49 (s, 1H, C<sub>carborane</sub>-H), 3.37 (s, 1H, C<sub>carborane</sub>-H), 3.00 – 1.34 (m, 9H, B<sub>carborane</sub>-H), 0.24 (s, br, 3H, B-CH<sub>3</sub>). **<sup>11</sup>B NMR (128 MHz, CDCl<sub>3</sub>):** δ 7.25 (s, 1B), -1.78 (d, 1B, <sup>1</sup>J<sub>BH</sub> = 148 Hz), -8.57 (d, 2B, <sup>1</sup>J<sub>BH</sub> = 148 Hz), -13.59 (d, 2B, <sup>1</sup>J<sub>BH</sub> = 148 Hz), -14.59 (d, 2B, <sup>1</sup>J<sub>BH</sub> = 132 Hz), -15.72 (d, 2B, <sup>1</sup>J<sub>BH</sub> = 181 Hz). **<sup>13</sup>C NMR (126 MHz, CDCl<sub>3</sub>):** δ 53.45, 47.21, B-CH<sub>3</sub> not observed due to B-C coupling. **GC-MS *m/z*:** 158.2094 (calc. 158.2099)

### 9-(4-CH<sub>3</sub>-C<sub>6</sub>H<sub>4</sub>)-1,2-dicarba-*closo*-dodecaborane (1F)

Purification: 1:9 CH<sub>2</sub>Cl<sub>2</sub>:Hexanes (**R<sub>f</sub>**: 0.25), 157 mg (67%), white solid

**<sup>1</sup>H NMR (400 MHz, CDCl<sub>3</sub>):** δ 7.28 (d, 2H, <sup>1</sup>J<sub>HH</sub> = 7.72 Hz), 7.06 (d, 2H, <sup>1</sup>J<sub>HH</sub> = 7.35 Hz), 3.58 (s, 1H, C<sub>carborane</sub>-H), 3.48 (s, 1H, C<sub>carborane</sub>-H), 3.25 – 1.60 (m, 9H, B<sub>carborane</sub>-H), 2.30 (s, 3H). **<sup>11</sup>B NMR (128 MHz, CDCl<sub>3</sub>):** δ 7.50 (s, 1B), -2.41 (d, 1B, <sup>1</sup>J<sub>BH</sub> = 163 Hz), -8.95 (d, 2B, <sup>1</sup>J<sub>BH</sub> = 150 Hz), -14.08 – -15.68 (m, 6B). **<sup>13</sup>C NMR (126 MHz, CDCl<sub>3</sub>):** δ 136.91, 132.37, 128.27, 53.09, 48.64, 21.20. **GC-MS *m/z*:** 234.2406 (calc. 234.2412)

### 9-(2-C<sub>4</sub>H<sub>3</sub>S)-1,2-dicarba-*closo*-dodecaborane (1G)

Purification: 2:8 CH<sub>2</sub>Cl<sub>2</sub>:Hexanes (**R<sub>f</sub>**: 0.34), 183 mg (77%, average of two independent runs), white solid

**<sup>1</sup>H NMR (400 MHz, CDCl<sub>3</sub>):** δ 7.32 (dd, 1H, <sup>1</sup>J<sub>HH</sub> = 4.61 Hz, <sup>2</sup>J<sub>HH</sub> = 0.80 Hz), 7.01 (m, 2H), 3.60 (s, 1H, C<sub>carborane</sub>-H), 3.49 (s, 1H, C<sub>carborane</sub>-H), 3.20 – 1.50 (m, 9H, B<sub>carborane</sub>-H). **<sup>11</sup>B NMR (128 MHz, CDCl<sub>3</sub>):** δ 4.49 (s, 1B), -2.22 (d, 1B, <sup>1</sup>J<sub>BH</sub> = 149 Hz), -8.82 (d, 2B, <sup>1</sup>J<sub>BH</sub> = 155 Hz), -13.97 – -15.75 (m, 6B). **<sup>13</sup>C NMR (126 MHz, CDCl<sub>3</sub>):** δ 130.75, 127.91, 127.80, 53.00, 48.87. **GC-MS *m/z*:** 226.1815 (calc. 226.1819)

### 9-CH<sub>3</sub>-1,7-dicarba-*closo*-dodecaborane (1H)

Purification: Hexanes (**R<sub>f</sub>**: 0.71), 54 mg (34%), white solid

**<sup>1</sup>H NMR (400 MHz, CDCl<sub>3</sub>):** δ 3.33 – 1.57 (m, 9H, B<sub>carborane</sub>-H), 2.86 (s, 2H, C<sub>carborane</sub>-H), 0.36 (s, 3H). **<sup>11</sup>B NMR (128 MHz, CDCl<sub>3</sub>):** δ -0.69 (s, 1B), -6.35 (d, 2B, <sup>1</sup>J<sub>BH</sub> = 160 Hz), -9.72 (d, 1B, <sup>1</sup>J<sub>BH</sub> = 148 Hz), -13.10 (d, 2B, <sup>1</sup>J<sub>BH</sub> = 160 Hz), -14.32 (d, 2B, <sup>1</sup>J<sub>BH</sub> = 160 Hz), -17.98 (d, 1B, <sup>1</sup>J<sub>BH</sub> = 184 Hz), -21.23 (d, 1B, <sup>1</sup>J<sub>BH</sub> = 180 Hz). **<sup>13</sup>C NMR (126 MHz, CDCl<sub>3</sub>):** δ 54.34, B-CH<sub>3</sub> not observed due to B-C coupling. **GC-MS *m/z*:** 158.2092 (calc. 158.2099)

### 9-Br-10-(CH<sub>3</sub>)-1,7-dicarba-*closo*-dodecaborane (1I)

Purification: 1:9 CH<sub>2</sub>Cl<sub>2</sub>:Hexanes (**R<sub>f</sub>**: 0.52), 192 mg (81%), white solid

**<sup>1</sup>H NMR (400 MHz, CDCl<sub>3</sub>):** δ 3.49 – 1.70 (m, 8H, B<sub>carborane</sub>-H), 2.91 (s, 2H, C<sub>carborane</sub>-H), 0.46 (s, 3H). **<sup>11</sup>B NMR (128 MHz, CDCl<sub>3</sub>):** δ -1.05 (s, 1B), -5.89 (d, 2B), -5.89 (s, 1B), -13.84 (d, 4B, <sup>1</sup>J<sub>BH</sub> = 158 Hz),

-21.80 (d, 2B,  $^1J_{\text{BH}} = 182$  Hz).  $^{13}\text{C}$  NMR (126 MHz,  $\text{CDCl}_3$ ):  $\delta$  52.61, B- $\text{CH}_3$  not observed due to B-C coupling. GC-MS  $m/z$ : 237.1175 (calc. 237.1167)

### 9-Br-10-(4- $\text{CF}_3$ - $\text{C}_6\text{H}_4$ )-1,7-dicarba-*closo*-dodecaborane (1J)

Purification: 1:9  $\text{CH}_2\text{Cl}_2$ :Hexanes ( $R_f$ : 0.38), 272 mg (75%), light yellow solid

$^1\text{H}$  NMR (400 MHz,  $\text{CDCl}_3$ ):  $\delta$  7.66 (d, br, 2H,  $^1J_{\text{HH}} = 7.77$  Hz), 7.57 (d, br, 2H,  $^1J_{\text{HH}} = 7.94$  Hz), 3.71 – 1.64 (m, 8H,  $\text{B}_{\text{carborane-H}}$ ), 3.07 (s, 2H,  $\text{C}_{\text{carborane-H}}$ ).  $^{11}\text{B}$  NMR (128 MHz,  $\text{CDCl}_3$ ):  $\delta$  -1.18 (s, 1B), -6.03 (s, 1B), -6.44 (d, 2B), -13.15 (d, 2B), -13.90 (d, 2B), -20.31 (d, 1B), -21.27 (d, 1B).  $^{13}\text{C}$  NMR (100 MHz,  $(\text{CD}_3)_2\text{CO}$ ):  $\delta$  133.81, 129.35 (q), 126.02, 124.16 (d, br), 123.33, 53.42.  $^{19}\text{F}$  NMR (376 MHz,  $\text{CDCl}_3$ ):  $\delta$  -62.59 (s, 3F). GC-MS  $m/z$ : 367.1208 (calc. 367.1198)

### 1-(2)-pyridine-1,2-dicarba-*closo*-dodecaborane (2A)

Purification: Acetone/hexanes gradient (10%-50% acetone;  $R_f$ : 0.40 in 25% acetone in hexanes), 129 mg (78%), white solid.

$^1\text{H}$  NMR (400 MHz,  $\text{CDCl}_3$ ):  $\delta$  8.41 (m, 1H), 7.70 (m, 1H), 7.53 (d, 1H,  $^1J_{\text{HH}} = 7.89$  Hz), 7.31 (m, 1H), 4.99 (s, 1H,  $\text{C}_{\text{carborane-H}}$ ), 3.00-1.68 (m, 10H,  $\text{B}_{\text{carborane-H}}$ ).  $^{11}\text{B}$  NMR (160 MHz,  $\text{CDCl}_3$ ):  $\delta$  -1.97- -4.81 (m, 2B), -8.21 (d, 2B,  $^1J_{\text{BH}} = 150$  Hz), -9.23- -14.19 (m, 6B).  $^{13}\text{C}$  NMR (126 MHz,  $\text{CDCl}_3$ ):  $\delta$  56.95,  $\delta$  75.37,  $\delta$  121.65,  $\delta$  124.42,  $\delta$  137.47,  $\delta$  148.86,  $\delta$  151.14. GC-MS  $m/z$ : 221.2165 (calc. 221.2208)

### 1-(6)-2,2'-bipyridine-1,2-dicarba-*closo*-dodecaborane (2B)

The 6-chloro-2,2'-bipyridine substrate was synthesized through the adaptation of a previously reported procedure.<sup>4</sup>

Purification: Hexanes ( $R_f$ : 0.30), 96 mg (43%), white solid. Single crystals for X-ray diffraction analysis were grown by dissolving product hot hexanes and acetone and cooling to room temperature.

$^1\text{H}$  NMR (400 MHz,  $\text{CDCl}_3$ ):  $\delta$  8.68 (dq, 1H,  $^1J_{\text{HH}} = 4.8$ ,  $^2J_{\text{HH}} = 0.8$  Hz), 8.45 (dd, 1H,  $^1J_{\text{HH}} = 7.9$ ,  $^2J_{\text{HH}} = 0.8$  Hz), 8.25 (td, 1H,  $^1J_{\text{HH}} = 7.9$ ,  $^2J_{\text{HH}} = 1.0$  Hz), 7.84 (t, 2H,  $^1J_{\text{HH}} = 7.9$  Hz), 7.56 (dd, 1H,  $^1J_{\text{HH}} = 7.9$ ,  $^2J_{\text{HH}} = 0.8$  Hz), 7.35 (m, 1H), 5.03 (s, 1H,  $\text{C}_{\text{carborane-H}}$ ), 3.08-1.70 (m, 10H,  $\text{B}_{\text{carborane-H}}$ ).  $^{11}\text{B}$  NMR (160 MHz,  $\text{CDCl}_3$ ):  $\delta$  -0.61- -5.17 (m, 2B), -8.22 (d, 2B,  $^1J_{\text{BH}} = 150$  Hz), -9.38- -15.58 (m, 6B).  $^{13}\text{C}$  NMR (126 MHz,  $\text{CDCl}_3$ ):  $\delta$  56.94, 75.49, 121.23, 121.60, 121.77, 124.54, 137.15, 138.58, 149.54, 150.34, 154.83, 155.46. GC-MS  $m/z$ : 298.2426 (calc. 298.2473)

### 1-(6,6')-2,2'-bipyridine-di-1,2-dicarba-*closo*-dodecaborane (2C)

The 6-chloro-2,2'-bipyridine substrate was synthesized through the adaptation of a previously reported procedure.<sup>4</sup>

\*This reaction was done in 8 mL solvent and dried with  $\text{Na}_2\text{SO}_4$ .

\*Purification: silica gel column chromatography with boiling 1,2-dichloroethane ( $R_f$  : 0.95), then dissolved in  $\text{CH}_2\text{Cl}_2$  and stirred with activated carbon at room temperature for 6 hours. Product was filtered through a pad of Celite, then concentrated *in vacuo*. 240 mg (73%), white solid. Single crystals suitable for X-ray diffraction studies were obtained *via* slow evaporation of a hot, concentrated solution of 1,2-dichloroethane.

**$^1\text{H}$  NMR (400 MHz,  $(\text{CD}_3)_2\text{CO}$ ):**  $\delta$  8.67 (2H, dd,  $^1J_{\text{HH}} = 7.9$  Hz,  $^2J_{\text{HH}} = 0.8$  Hz), 8.07 (2H, t,  $^1J_{\text{HH}} = 7.9$  Hz), 7.80 (2H, dd,  $^1J_{\text{HH}} = 7.9$  Hz,  $^2J_{\text{HH}} = 0.8$  Hz), 5.74 (2H, br s,  $\text{C}_{\text{carborane-H}}$ ), 3.31 – 1.59 (20H, br m,  $\text{B}_{\text{carborane-H}}$ ).  **$^{11}\text{B}$  NMR (160 MHz):**  $\delta$  -2.65 – -5.60 (4B, m), -8.00 – -16.40 (6B, m).  **$^{13}\text{C}$  NMR (126 MHz,  $(\text{CD}_3)_2\text{CO}$ ):**  $\delta$  59.32, 123.18, 123.28, 140.34, 151.08, 154.84

### 1-(1)-naphthalene-1,2-dicarba-closo-dodecaborane (2D)

Purification: Hexanes ( $R_f$  : 0.33), 132 mg (65%), white powder.

**$^1\text{H}$  NMR (400 MHz,  $\text{CDCl}_3$ ):**  $\delta$  8.71 (d, 1H,  $^1J_{\text{HH}} = 8.96$  Hz), 7.90 (d, 1H,  $^1J_{\text{HH}} = 7.98$  Hz), 7.80 (d, 1H,  $^1J_{\text{HH}} = 8.20$  Hz), 7.60 (m, 1H), 7.53 (m, 1H), 7.41 (t, 1H,  $^1J_{\text{HH}} = 7.98$  Hz), 4.64 (s, 1H,  $\text{C}_{\text{carborane-H}}$ ), 3.76-1.58 (m, 10H,  $\text{B}_{\text{carborane-H}}$ ).  **$^{11}\text{B}$  NMR (160 MHz,  $\text{CDCl}_3$ ):**  $\delta$  -2.79 (d, 2B,  $^1J_{\text{BH}} = 148$  Hz), -7.94- -11.43 (m, 6B), -13.40 (d, 2B,  $^1J_{\text{BH}} = 164$  Hz).  **$^{13}\text{C}$  NMR (126 MHz,  $\text{CDCl}_3$ ):**  $\delta$  61.28, 124.52, 124.65, 126.25, 127.34, 128.34, 128.82, 129.93, 130.02, 131.88, 134.91. **GC-MS  $m/z$ :** 270.2393 (calc. 270.2412)

### 1-(6)-quinoline-1,2-dicarba-closo-dodecaborane (2E)

\*Isopropoxytrimethylsilane (1 eq.) was added to 6-fluoroquinoline. This mixture was then added to the solution of  $\text{K}_2[\text{oCB}]$ .

\*Purification: Acetone/hexanes gradient (10%-90% acetone;  $R_f$  : 0.40 in 25% acetone in hexanes). The crude product was stirred with activated charcoal in 1,2-dichloroethane at  $40^\circ\text{C}$ , then filtered through a pad of Celite and concentrated *in vacuo*. 96 mg (47%), white solid.

**$^1\text{H}$  NMR (400 MHz,  $\text{CDCl}_3$ ):**  $\delta$  8.97 (m, 1H), 8.18 (m, 1H), 8.09 (d, 1H), 7.99 (d, 1H), 7.67 (m, 2H), 4.10 (s, 1H,  $\text{C}_{\text{carborane-H}}$ ), 3.38-1.68 (m, 10H,  $\text{B}_{\text{carborane-H}}$ ).  **$^{11}\text{B}$  NMR (160 MHz,  $\text{CDCl}_3$ ):**  $\delta$  -1.53 (d, 1B,  $^1J_{\text{BH}} = 150$  Hz), -3.72 (s, 1B,  $^1J_{\text{BH}} = 142$  Hz), -8.44 (d, 2B,  $^1J_{\text{BH}} = 74$  Hz), -9.38- -13.35 (m, 6B).  **$^{13}\text{C}$  NMR (126 MHz,  $\text{CDCl}_3$ ):**  $\delta$  60.44, 76.05, 122.25, 127.60, 127.80, 128.01, 130.48, 131.62, 136.63, 148.20, 152.30. **GC-MS  $m/z$ :** 271.2364 (calc. 271.2364)

### 1-(2,6)-pyridine-di-1,2-dicarba-closo-dodecaborane (2F)

Purification: Hexanes ( $R_f$  : 0.27), 204 mg (75%), white solid. Single crystals suitable for X-ray diffraction studies were obtained by dissolving product in hot hexanes and cooling to room temperature.

**$^1\text{H}$  NMR (400 MHz,  $\text{CDCl}_3$ ):**  $\delta$  7.78 (m, 1H), 7.61 (d, 2H,  $^1J_{\text{HH}} = 7.91$  Hz), 4.48 (s, 2H,  $\text{C}_{\text{carborane-H}}$ ), 3.19-1.61 (m, 10H,  $\text{B}_{\text{carborane-H}}$ ).  **$^{11}\text{B}$  NMR (160 MHz,  $\text{CDCl}_3$ ):**  $\delta$  -1.37- -4.26 (m, 2B), -8.07 (d, 2B,  $^1J_{\text{BH}}$ )

= 151 Hz), 9.23- -15.79 (m, 6B).  $^{13}\text{C}$  NMR (126 MHz,  $\text{CDCl}_3$ ):  $\delta$  56.73, 74.13, 122.91, 139.36, 150.62. GC-MS  $m/z$ : 363.3980 (calc. 363.3993)

### 1,7-(2,2)-dipyridine-di-1,7-dicarba-closo-dodecaborane (2G)

Purification: Hexanes ( $R_f$  : 0.80), 156 mg (70%), white solid. Single crystals suitable for X-ray diffraction studies were obtained *via* slow evaporation dichloromethane.

$^1\text{H}$  NMR (400 MHz,  $\text{CDCl}_3$ ):  $\delta$  8.51 (dq, 2H,  $^1J_{\text{HH}} = 4.81$  Hz,  $^2J_{\text{HH}} = 1.93$  Hz,  $^3J_{\text{HH}} = 0.93$  Hz), 7.78 (td, 2H,  $^1J_{\text{HH}} = 7.79$  Hz,  $^2J_{\text{HH}} = 1.88$  Hz), 7.47 (dt, 2H,  $^1J_{\text{HH}} = 8.05$  Hz,  $^2J_{\text{HH}} = 1.00$  Hz), 7.24-7.25 (m, 2H), 4.32-1.67 (m, 10H,  $B_{\text{carborane-H}}$ ).  $^{11}\text{B}$  NMR (160 MHz,  $\text{CDCl}_3$ ):  $\delta$  -5.38 (d, 2B,  $^1J_{\text{BH}} = 159$  Hz), -10.33 (d, 6B,  $^1J_{\text{BH}} = 158$  Hz), -12.78 (d, 2B,  $^1J_{\text{BH}} = 183$  Hz).  $^{13}\text{C}$  NMR (126 MHz,  $\text{CDCl}_3$ ):  $\delta$  78.86, 122.13, 123.67, 136.94, 149.02, 152.89. GC-MS  $m/z$ : 298.2460 (calc. 298.2473)

### 1,4-((1)-[(2)-pyridine]-1,2-dicarba-closo-dodecaborane)-2,3,5,6-tetrafluorobenzene (2H)

Purification: 9:1 hexanes acetone ( $R_f$  : 0.25) Yield 74%. Single crystals suitable for X-ray diffraction studies were obtained by dissolving product in hot hexanes and cooling to room temperature.

$^1\text{H}$  NMR (400 MHz,  $\text{CDCl}_3$ ):  $\delta$  7.78 (dd, 1H), 7.49 (m, 1H), 7.21 (m, 1H), 3.52-2.22 (m, 20H,  $B_{\text{carborane-H}}$ ).  $^{11}\text{B}$  NMR (160 MHz,  $\text{CDCl}_3$ ):  $\delta$  -0.40 (d, 1B,  $^1J_{\text{BH}} = 126$  Hz), -2.80 (d, 1B,  $^1J_{\text{BH}} = 144$ Hz), -8.77 (m, 6B).  $^{13}\text{C}$  NMR (126 MHz,  $\text{CDCl}_3$ ):  $\delta$  31.09, 71.95, 83.77, 124.05, 124.51, 137.44, 148.39, 150.08.  $^{19}\text{F}$  NMR (376 MHz,  $\text{CDCl}_3$ ):  $\delta$  -130.13 (s, 4F). This product was not detected by GC-MS.

### 1,2-(2,2)-dipyridine-9-methyl-1,2-dicarba-closo-dodecaborane (2I)

Purification: 10% acetone in hexanes gradient ( $R_f$  : 0.35) 60 mg (38%), white solid. Single crystals for X-ray diffraction analysis were grown by dissolving product in hot hexanes and cooling to room temperature.

$^1\text{H}$  NMR (400 MHz,  $\text{CDCl}_3$ ):  $\delta$  8.22 (dq, 2H,  $^1J_{\text{HH}} = 4.8$ ,  $^2J_{\text{HH}} = 0.9$  Hz), 7.65 (m, 2H), 7.54 (tt, 2H,  $^1J_{\text{HH}} = 7.8$ ,  $^2J_{\text{HH}} = 1.7$  Hz), 7.11 (m, 2H,  $^1J_{\text{HH}} = 4.8$ ,  $^2J_{\text{HH}} = 0.8$  Hz), 4.50-1.69 (m, 9H,  $B_{\text{carborane-H}}$ ), 0.35 (s, 3H).  $^{11}\text{B}$  NMR (160 MHz,  $\text{CDCl}_3$ ):  $\delta$  7.60 (s, 1B), -1.50 (d, 1B,  $^1J_{\text{BH}} = 144$  Hz), -7.06- -11.85 (m, 8B).  $^{13}\text{C}$  NMR (126 MHz,  $\text{CDCl}_3$ ):  $\delta$  76.22, 82.45, 124.12, 124.15, 125.30, 125.58, 136.58, 148.55, 148.58, 149.14, 149.38. GC-MS  $m/z$ : 312.2616 (calc. 312.2630).

## 4. References

1. Bruno, N. C.; Tudge, M. T.; Buchwald, S. L. *Chem. Sci.* **2013**, *4*, 916-920.
2. Dziejdzic, R. M.; Saleh, L. M. A.; Axtell, J. C.; Martin, J. L.; Stevens, S. L.; Royappa, A. T.; Rheingold, A. L.; Spokoyny, A. M. *J. Am. Chem. Soc.* **2016**, *138*, 9081-9084.
3. Kirlikovali, K. O.; Axtell, J. C., Gonzalez, A.; Phung, A. C.; Khan, S. I.; Spokoyny, A. M. *Chem. Sci.* **2016**, *7*, 5132-5138.
4. Jung, J.-C.; Jung, Y.-J.; Park, O.-S., PREPARATION OF 2-CHLOROPYRIDINE. *Synthetic Communications* 2001, *31* (16), 2507-2511.

## 5. Crystal Structure Data

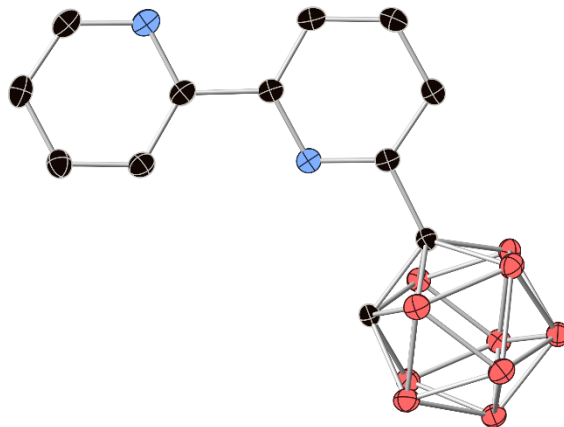

**Figure S1.** Single crystal X-ray structure of **2B**. H-atoms are omitted for clarity.

**Table S4.** Crystal data and structure refinement for **2B**.

|                                   |                                                                |                              |
|-----------------------------------|----------------------------------------------------------------|------------------------------|
| Compound                          | <b>2B</b>                                                      |                              |
| Empirical formula                 | C <sub>12</sub> H <sub>18</sub> B <sub>10</sub> N <sub>2</sub> |                              |
| Formula weight                    | 298.38                                                         |                              |
| Temperature                       | 100.0 K                                                        |                              |
| Wavelength                        | 1.54178 Å                                                      |                              |
| Crystal system                    | Monoclinic                                                     |                              |
| Space group                       | C 2/c                                                          |                              |
| Unit cell dimensions              | a = 25.1102(12) Å                                              | $\alpha = 90^\circ$ .        |
|                                   | b = 7.1488(4) Å                                                | $\beta = 122.287(2)^\circ$ . |
|                                   | c = 20.7681(9) Å                                               | $\gamma = 90^\circ$ .        |
| Volume                            | 3151.6(3) Å <sup>3</sup>                                       |                              |
| Z                                 | 8                                                              |                              |
| Density (calculated)              | 1.258 Mg/m <sup>3</sup>                                        |                              |
| Absorption coefficient            | 0.470 mm <sup>-1</sup>                                         |                              |
| F(000)                            | 1232                                                           |                              |
| Crystal size                      | 0.29 x 0.28 x 0.26 mm <sup>3</sup>                             |                              |
| Theta range for data collection   | 4.165 to 68.312°.                                              |                              |
| Index ranges                      | -29 ≤ h ≤ 30, -8 ≤ k ≤ 8, -23 ≤ l ≤ 25                         |                              |
| Reflections collected             | 10354                                                          |                              |
| Independent reflections           | 2846 [R(int) = 0.0300]                                         |                              |
| Completeness to theta = 67.679°   | 98.6 %                                                         |                              |
| Absorption correction             | Semi-empirical from equivalents                                |                              |
| Max. and min. transmission        | 0.7531 and 0.7008                                              |                              |
| Refinement method                 | Full-matrix least-squares on F <sup>2</sup>                    |                              |
| Data / restraints / parameters    | 2846 / 0 / 261                                                 |                              |
| Goodness-of-fit on F <sup>2</sup> | 1.047                                                          |                              |
| Final R indices [I > 2σ(I)]       | R1 = 0.0423, wR2 = 0.1165                                      |                              |
| R indices (all data)              | R1 = 0.0464, wR2 = 0.1200                                      |                              |
| Extinction coefficient            | n/a                                                            |                              |
| Largest diff. peak and hole       | 0.266 and -0.263 e.Å <sup>-3</sup>                             |                              |



**Table S5.** Atomic coordinates ( $\times 10^4$ ) and equivalent isotropic displacement parameters ( $\text{\AA}^2 \times 10^3$ ) for spok106\_0m\_a (**2B**).  $U(\text{eq})$  is defined as one third of the trace of the orthogonalized  $U^{ij}$  tensor.

|       | x       | y       | z       | U(eq) |
|-------|---------|---------|---------|-------|
| N(2)  | 8440(1) | 5658(2) | 5967(1) | 20(1) |
| N(1)  | 7252(1) | 4803(2) | 3995(1) | 16(1) |
| C(10) | 6634(1) | 4524(2) | 3558(1) | 16(1) |
| C(6)  | 7507(1) | 4986(2) | 4750(1) | 16(1) |
| C(11) | 6369(1) | 4351(2) | 2716(1) | 16(1) |
| C(9)  | 6237(1) | 4383(2) | 3832(1) | 19(1) |
| C(2)  | 9474(1) | 5697(2) | 6160(1) | 22(1) |
| C(5)  | 8203(1) | 5255(2) | 5232(1) | 17(1) |
| C(1)  | 9066(1) | 5878(2) | 6411(1) | 21(1) |
| C(12) | 6864(1) | 4553(2) | 2439(1) | 16(1) |
| C(4)  | 8578(1) | 5056(2) | 4926(1) | 19(1) |
| C(8)  | 6505(1) | 4572(2) | 4609(1) | 21(1) |
| C(3)  | 9224(1) | 5275(2) | 5400(1) | 22(1) |
| C(7)  | 7145(1) | 4898(2) | 5075(1) | 20(1) |
| B(5)  | 5390(1) | 3798(2) | 1231(1) | 17(1) |
| B(7)  | 6538(1) | 5610(2) | 1576(1) | 18(1) |
| B(3)  | 5789(1) | 2785(2) | 2154(1) | 17(1) |
| B(8)  | 6678(1) | 3149(2) | 1689(1) | 19(1) |
| B(6)  | 5742(1) | 6025(2) | 1290(1) | 18(1) |
| B(10) | 5938(1) | 4020(2) | 942(1)  | 17(1) |
| B(9)  | 5970(1) | 2015(2) | 1477(1) | 18(1) |
| B(4)  | 6584(1) | 2355(2) | 2436(1) | 18(1) |
| B(2)  | 5651(1) | 5240(2) | 2041(1) | 17(1) |
| B(1)  | 6355(1) | 6386(2) | 2249(1) | 17(1) |

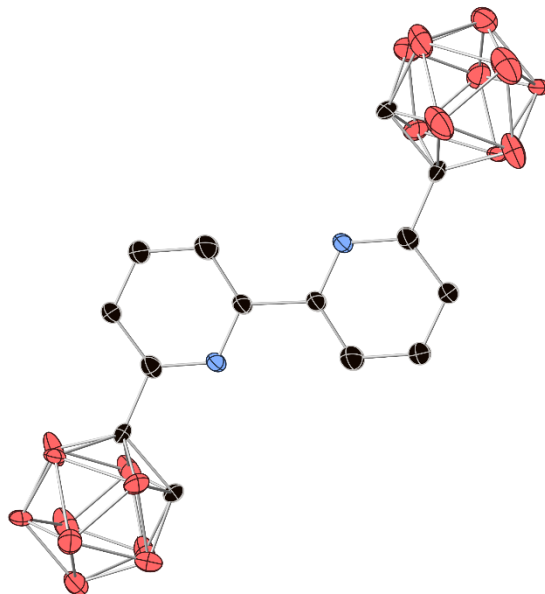

**Figure S2.** Single crystal X-ray structure of **2C**. H-atoms are omitted for clarity.

**Table S6.** Crystal data and structure refinement for **2C**.

|                                   |                                                                |                 |
|-----------------------------------|----------------------------------------------------------------|-----------------|
| Compound                          | <b>2C</b>                                                      |                 |
| Empirical formula                 | C <sub>14</sub> H <sub>28</sub> B <sub>20</sub> N <sub>2</sub> |                 |
| Formula weight                    | 440.58                                                         |                 |
| Temperature                       | 100.0 K                                                        |                 |
| Wavelength                        | 1.54178 Å                                                      |                 |
| Crystal system                    | Triclinic                                                      |                 |
| Space group                       | P-1                                                            |                 |
| Unit cell dimensions              | a = 7.5443(8) Å                                                | α = 98.131(8)°. |
|                                   | b = 7.6742(10) Å                                               | β = 99.051(7)°. |
|                                   | c = 21.996(3) Å                                                | γ = 90.522(7)°. |
| Volume                            | 1244.3(3) Å <sup>3</sup>                                       |                 |
| Z                                 | 2                                                              |                 |
| Density (calculated)              | 1.176 Mg/m <sup>3</sup>                                        |                 |
| Absorption coefficient            | 0.394 mm <sup>-1</sup>                                         |                 |
| F(000)                            | 452                                                            |                 |
| Crystal size                      | 0.28 x 0.25 x 0.05 mm <sup>3</sup>                             |                 |
| Theta range for data collection   | 2.055 to 65.982°.                                              |                 |
| Index ranges                      | -8 ≤ h ≤ 8, -7 ≤ k ≤ 8, -26 ≤ l ≤ 26                           |                 |
| Reflections collected             | 14151                                                          |                 |
| Independent reflections           | 4012 [R(int) = 0.0663]                                         |                 |
| Completeness to theta = 65.982°   | 97.6 %                                                         |                 |
| Absorption correction             | Semi-empirical from equivalents                                |                 |
| Max. and min. transmission        | 0.7531 and 0.6341                                              |                 |
| Refinement method                 | Full-matrix least-squares on F <sup>2</sup>                    |                 |
| Data / restraints / parameters    | 4012 / 0 / 326                                                 |                 |
| Goodness-of-fit on F <sup>2</sup> | 1.549                                                          |                 |
| Final R indices [I > 2σ(I)]       | R1 = 0.1231, wR2 = 0.3291                                      |                 |
| R indices (all data)              | R1 = 0.1309, wR2 = 0.3435                                      |                 |
| Extinction coefficient            | n/a                                                            |                 |
| Largest diff. peak and hole       | 0.349 and -0.405 e.Å <sup>-3</sup>                             |                 |
| Twinned                           | pseudomerohedral                                               |                 |

**Table S7.** Atomic coordinates ( $\times 10^4$ ) and equivalent isotropic displacement parameters ( $\text{\AA}^2 \times 10^3$ ) for spok119\_0m (2C).  $U(\text{eq})$  is defined as one third of the trace of the orthogonalized  $U^{ij}$  tensor.

|       | x         | y        | z       | $U(\text{eq})$ |
|-------|-----------|----------|---------|----------------|
| N(2)  | 8502(6)   | 6109(6)  | 478(2)  | 18(1)          |
| N(1)  | 10621(6)  | 1531(6)  | 4521(2) | 19(1)          |
| C(9)  | 6704(7)   | 7438(7)  | 1217(2) | 17(1)          |
| C(13) | 10447(8)  | 3732(7)  | 688(3)  | 23(1)          |
| C(12) | 9894(8)   | 3733(8)  | 1259(3) | 26(1)          |
| C(3)  | 10066(7)  | 2080(8)  | 3971(3) | 22(1)          |
| C(14) | 9703(7)   | 4954(7)  | 306(3)  | 21(1)          |
| C(2)  | 11215(8)  | 3452(7)  | 3782(2) | 21(1)          |
| C(7)  | 9657(7)   | 298(8)   | 4687(3) | 24(1)          |
| C(5)  | 7495(10)  | 157(11)  | 3766(4) | 46(2)          |
| C(10) | 7994(7)   | 6096(7)  | 1036(3) | 21(1)          |
| B(14) | 7478(8)   | 9592(8)  | 1277(3) | 21(1)          |
| B(7)  | 10381(12) | 4974(10) | 3331(3) | 35(2)          |
| C(6)  | 8070(9)   | -413(10) | 4336(4) | 38(2)          |
| C(1)  | 12920(10) | 4269(9)  | 4298(3) | 32(2)          |
| B(18) | 6268(9)   | 10798(9) | 1814(3) | 25(1)          |
| C(11) | 8654(8)   | 4933(8)  | 1447(3) | 22(1)          |
| B(6)  | 11727(8)  | 3264(8)  | 3041(3) | 20(1)          |
| B(12) | 5175(9)   | 7108(9)  | 1694(3) | 24(1)          |
| B(9)  | 14041(14) | 6314(13) | 3497(4) | 49(2)          |
| B(10) | 12166(10) | 5441(9)  | 2943(3) | 27(2)          |
| C(4)  | 8486(8)   | 1451(8)  | 3586(3) | 29(1)          |
| B(19) | 5549(9)   | 10726(9) | 1000(3) | 25(1)          |
| B(4)  | 13351(9)  | 2777(11) | 3683(3) | 31(2)          |
| B(17) | 4801(9)   | 9262(10) | 2076(3) | 28(2)          |
| B(11) | 4468(8)   | 7067(10) | 877(3)  | 26(1)          |
| B(15) | 3681(9)   | 9181(10) | 747(3)  | 26(1)          |
| B(1)  | 11134(14) | 5586(11) | 4151(4) | 42(2)          |
| B(3)  | 14725(12) | 4659(12) | 3965(4) | 44(2)          |
| C(8)  | 5854(7)   | 8626(8)  | 691(3)  | 23(1)          |
| B(13) | 7012(8)   | 8665(8)  | 1946(3) | 22(1)          |

|       |           |           |         |       |
|-------|-----------|-----------|---------|-------|
| B(16) | 3238(9)   | 8294(10)  | 1419(3) | 27(2) |
| B(20) | 3926(9)   | 10555(10) | 1493(3) | 29(2) |
| B(8)  | 11787(15) | 6880(9)   | 3613(3) | 45(2) |
| B(5)  | 14019(10) | 4067(12)  | 3148(3) | 36(2) |
| B(2)  | 13430(16) | 6367(11)  | 4252(3) | 48(3) |

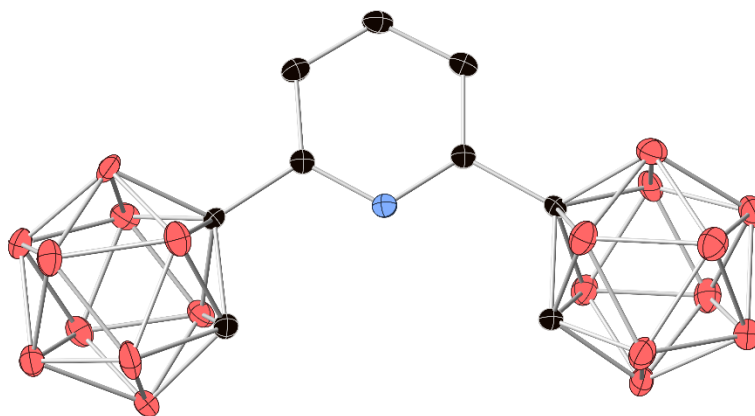

**Figure S3.** Single crystal X-ray structure of **2F**. H-atoms omitted for clarity.

**Table S8.** Crystal data and structure refinement for **2F**.

|                                   |                                                  |          |
|-----------------------------------|--------------------------------------------------|----------|
| Compound                          | <b>2F</b>                                        |          |
| Empirical formula                 | C <sub>9</sub> H <sub>25</sub> B <sub>20</sub> N |          |
| Formula weight                    | 363.50                                           |          |
| Temperature                       | 100.0 K                                          |          |
| Wavelength                        | 0.71073 Å                                        |          |
| Crystal system                    | Tetragonal                                       |          |
| Space group                       | I-42d                                            |          |
| Unit cell dimensions              | a = 14.9695(6) Å                                 | α = 90°. |
|                                   | b = 14.9695(6) Å                                 | β = 90°. |
|                                   | c = 19.0130(10) Å                                | γ = 90°. |
| Volume                            | 4260.5(4) Å <sup>3</sup>                         |          |
| Z                                 | 8                                                |          |
| Density (calculated)              | 1.133 Mg/m <sup>3</sup>                          |          |
| Absorption coefficient            | 0.051 mm <sup>-1</sup>                           |          |
| F(000)                            | 1488                                             |          |
| Crystal size                      | 0.33 x 0.3 x 0.28 mm <sup>3</sup>                |          |
| Theta range for data collection   | 1.731 to 27.458°.                                |          |
| Index ranges                      | -14 ≤ h ≤ 18, -19 ≤ k ≤ 14, -24 ≤ l ≤ 19         |          |
| Reflections collected             | 11221                                            |          |
| Independent reflections           | 2441 [R(int) = 0.0667]                           |          |
| Completeness to theta = 25.242°   | 100.0 %                                          |          |
| Absorption correction             | Semi-empirical from equivalents                  |          |
| Max. and min. transmission        | 0.4915 and 0.4383                                |          |
| Refinement method                 | Full-matrix least-squares on F <sup>2</sup>      |          |
| Data / restraints / parameters    | 2441 / 0 / 137                                   |          |
| Goodness-of-fit on F <sup>2</sup> | 1.073                                            |          |
| Final R indices [I > 2σ(I)]       | R1 = 0.0474, wR2 = 0.1236                        |          |
| R indices (all data)              | R1 = 0.0525, wR2 = 0.1292                        |          |
| Absolute structure parameter      | -0.3(10)                                         |          |

Extinction coefficient n/a  
Largest diff. peak and hole 0.250 and -0.261 e.Å<sup>-3</sup>

**Table S9.** Atomic coordinates (  $\times 10^4$ ) and equivalent isotropic displacement parameters (Å<sup>2</sup> $\times 10^3$ ) for spok75\_0m\_a (**2F**). U(eq) is defined as one third of the trace of the orthogonalized U<sup>ij</sup> tensor.

|       | x       | y       | z       | U(eq) |
|-------|---------|---------|---------|-------|
| N(1)  | 1870(2) | 7500    | 6250    | 12(1) |
| C(1)  | 1940(1) | 5894(1) | 6173(1) | 12(1) |
| C(2)  | 3025(1) | 5981(2) | 6233(1) | 16(1) |
| C(3)  | 1405(1) | 6738(1) | 6218(1) | 12(1) |
| C(4)  | 475(1)  | 6700(2) | 6216(1) | 14(1) |
| C(5)  | 11(2)   | 7500    | 6250    | 16(1) |
| B(1)  | 2575(2) | 5764(2) | 5418(1) | 18(1) |
| B(2)  | 3569(2) | 5230(2) | 5718(2) | 20(1) |
| B(3)  | 3493(2) | 5093(2) | 6648(2) | 21(1) |
| B(4)  | 2460(2) | 5543(2) | 6942(1) | 18(1) |
| B(5)  | 1659(2) | 5051(2) | 5611(1) | 18(1) |
| B(6)  | 2694(2) | 4595(2) | 5321(1) | 19(1) |
| B(7)  | 3267(2) | 4176(2) | 6080(1) | 18(1) |
| B(8)  | 2579(2) | 4374(2) | 6836(1) | 19(1) |
| B(9)  | 1588(2) | 4914(2) | 6540(1) | 17(1) |
| B(10) | 2088(2) | 4066(2) | 6016(2) | 19(1) |

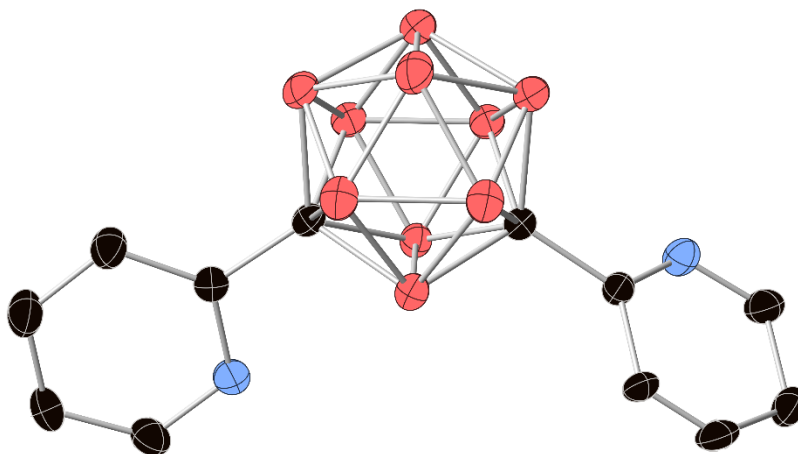

**Figure S4.** Single crystal X-ray structure of **2G**. H-atoms omitted for clarity.

**Table S10.** Crystal data and structure refinement for **2G**.

|                                   |                                                                |                    |
|-----------------------------------|----------------------------------------------------------------|--------------------|
| Compound                          | <b>2G</b>                                                      |                    |
| Empirical formula                 | C <sub>12</sub> H <sub>18</sub> B <sub>10</sub> N <sub>2</sub> |                    |
| Formula weight                    | 298.38                                                         |                    |
| Temperature                       | 100.15 K                                                       |                    |
| Wavelength                        | 1.54178 Å                                                      |                    |
| Crystal system                    | Monoclinic                                                     |                    |
| Space group                       | P 2 <sub>1</sub> /n                                            |                    |
| Unit cell dimensions              | a = 10.6774(4) Å                                               | α = 90°.           |
|                                   | b = 7.4665(3) Å                                                | β = 104.1230(10)°. |
|                                   | c = 20.6215(8) Å                                               | γ = 90°.           |
| Volume                            | 1594.31(11) Å <sup>3</sup>                                     |                    |
| Z                                 | 4                                                              |                    |
| Density (calculated)              | 1.243 Mg/m <sup>3</sup>                                        |                    |
| Absorption coefficient            | 0.465 mm <sup>-1</sup>                                         |                    |
| F(000)                            | 616                                                            |                    |
| Crystal size                      | 0.28 x 0.26 x 0.23 mm <sup>3</sup>                             |                    |
| Theta range for data collection   | 4.302 to 68.354°.                                              |                    |
| Index ranges                      | -12 ≤ h ≤ 12, -8 ≤ k ≤ 7, -24 ≤ l ≤ 24                         |                    |
| Reflections collected             | 11345                                                          |                    |
| Independent reflections           | 2906 [R(int) = 0.0376]                                         |                    |
| Completeness to theta = 67.679°   | 99.6 %                                                         |                    |
| Absorption correction             | Semi-empirical from equivalents                                |                    |
| Max. and min. transmission        | 0.5210 and 0.4338                                              |                    |
| Refinement method                 | Full-matrix least-squares on F <sup>2</sup>                    |                    |
| Data / restraints / parameters    | 2906 / 343 / 254                                               |                    |
| Goodness-of-fit on F <sup>2</sup> | 1.035                                                          |                    |
| Final R indices [I > 2σ(I)]       | R1 = 0.0442, wR2 = 0.1180                                      |                    |
| R indices (all data)              | R1 = 0.0472, wR2 = 0.1217                                      |                    |
| Extinction coefficient            | n/a                                                            |                    |
| Largest diff. peak and hole       | 0.248 and -0.324 e.Å <sup>-3</sup>                             |                    |

**Table S11.** Atomic coordinates ( $\times 10^4$ ) and equivalent isotropic displacement parameters ( $\text{\AA}^2 \times 10^3$ ) for spok71\_0m\_a (**2G**).  $U(\text{eq})$  is defined as one third of the trace of the orthogonalized  $U^{ij}$  tensor.

|        | x        | y        | z       | $U(\text{eq})$ |
|--------|----------|----------|---------|----------------|
| N(1)   | 6616(1)  | 9187(2)  | 4954(1) | 26(1)          |
| N(2')  | 3332(13) | 5530(20) | 2560(6) | 24(2)          |
| C(3)   | 7608(1)  | 8219(2)  | 4859(1) | 20(1)          |
| C(9)   | 3049(10) | 4610(20) | 3624(6) | 23(1)          |
| C(8)   | 3853(1)  | 5133(2)  | 3187(1) | 20(1)          |
| C(1)   | 7255(1)  | 6836(2)  | 4308(1) | 19(1)          |
| C(2)   | 5305(1)  | 5252(2)  | 3450(1) | 19(1)          |
| C(6)   | 8078(1)  | 10709(2) | 5852(1) | 29(1)          |
| C(12)  | 2108(10) | 5440(30) | 2301(6) | 28(2)          |
| C(4)   | 8862(1)  | 8426(2)  | 5241(1) | 29(1)          |
| C(11)  | 1243(1)  | 5036(2)  | 2724(1) | 28(1)          |
| C(7)   | 6860(1)  | 10408(2) | 5444(1) | 28(1)          |
| C(12') | 1724(9)  | 4650(30) | 3364(7) | 27(1)          |
| C(5)   | 9091(1)  | 9697(2)  | 5748(1) | 34(1)          |
| B(10)  | 5862(1)  | 5690(2)  | 4283(1) | 20(1)          |
| B(8)   | 7531(1)  | 7252(2)  | 3529(1) | 23(1)          |
| B(2)   | 6232(1)  | 6187(2)  | 2956(1) | 23(1)          |
| B(1)   | 5954(1)  | 7325(2)  | 3661(1) | 19(1)          |
| B(7)   | 6069(1)  | 3543(2)  | 3961(1) | 24(1)          |
| B(4)   | 7375(1)  | 4600(2)  | 4533(1) | 24(1)          |
| B(9)   | 8406(1)  | 5560(2)  | 4065(1) | 26(1)          |
| B(6)   | 7749(1)  | 5089(2)  | 3204(1) | 28(1)          |
| B(5)   | 6303(1)  | 3851(2)  | 3139(1) | 25(1)          |
| B(3)   | 7652(1)  | 3453(2)  | 3824(1) | 29(1)          |
| N(2)   | 3222(11) | 4740(30) | 3615(7) | 27(2)          |
| C(10)  | 1929(13) | 4560(40) | 3402(9) | 29(2)          |
| C(10') | 1936(11) | 5520(30) | 2327(8) | 26(2)          |
| C(9')  | 3360(20) | 5520(30) | 2501(9) | 24(2)          |

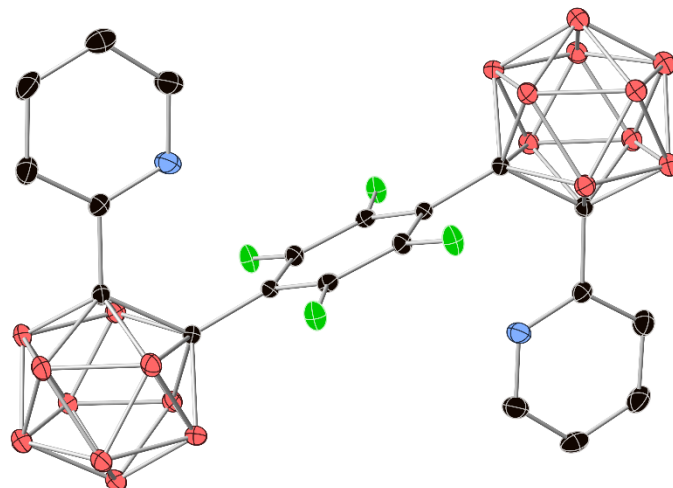

**Figure S5.** Single crystal X-ray structure of **2H**. H-atoms omitted for clarity.

**Table S12.** Crystal data and structure refinement for **2H**.

|                                   |                                                                               |                 |
|-----------------------------------|-------------------------------------------------------------------------------|-----------------|
| Compound                          | <b>2H</b>                                                                     |                 |
| Empirical formula                 | C <sub>20</sub> H <sub>28</sub> B <sub>20</sub> F <sub>4</sub> N <sub>2</sub> |                 |
| Formula weight                    | 588.64                                                                        |                 |
| Temperature                       | 100 K                                                                         |                 |
| Wavelength                        | 0.71073 Å                                                                     |                 |
| Crystal system                    | Monoclinic                                                                    |                 |
| Space group                       | P 2 <sub>1</sub> /n                                                           |                 |
| Unit cell dimensions              | a = 7.2661(12) Å                                                              | α = 90°.        |
|                                   | b = 15.0779(18) Å                                                             | β = 90.604(5)°. |
|                                   | c = 13.2917(16) Å                                                             | γ = 90°.        |
| Volume                            | 1456.1(3) Å <sup>3</sup>                                                      |                 |
| Z                                 | 2                                                                             |                 |
| Density (calculated)              | 1.343 Mg/m <sup>3</sup>                                                       |                 |
| Absorption coefficient            | 0.086 mm <sup>-1</sup>                                                        |                 |
| F(000)                            | 596                                                                           |                 |
| Crystal size                      | 0.32 x 0.29 x 0.25 mm <sup>3</sup>                                            |                 |
| Crystal color, habit              | Colorless block                                                               |                 |
| Theta range for data collection   | 2.702 to 28.296°.                                                             |                 |
| Index ranges                      | -9 ≤ h ≤ 8, -19 ≤ k ≤ 19, -17 ≤ l ≤ 17                                        |                 |
| Reflections collected             | 13668                                                                         |                 |
| Independent reflections           | 3596 [R(int) = 0.0356]                                                        |                 |
| Completeness to theta = 25.242°   | 99.8 %                                                                        |                 |
| Absorption correction             | Semi-empirical from equivalents                                               |                 |
| Max. and min. transmission        | 0.3343 and 0.2814                                                             |                 |
| Refinement method                 | Full-matrix least-squares on F <sup>2</sup>                                   |                 |
| Data / restraints / parameters    | 3596 / 0 / 208                                                                |                 |
| Goodness-of-fit on F <sup>2</sup> | 1.076                                                                         |                 |
| Final R indices [I > 2σ(I)]       | R1 = 0.0489, wR2 = 0.1211                                                     |                 |
| R indices (all data)              | R1 = 0.0605, wR2 = 0.1274                                                     |                 |
| Extinction coefficient            | n/a                                                                           |                 |
| Largest diff. peak and hole       | 0.368 and -0.261 e.Å <sup>-3</sup>                                            |                 |



**Table S13.** Atomic coordinates ( $\times 10^4$ ) and equivalent isotropic displacement parameters ( $\text{\AA}^2 \times 10^3$ ) for spok41\_a (**2H**).  $U(\text{eq})$  is defined as one third of the trace of the orthogonalized  $U^{ij}$  tensor.

|       | x       | y       | z       | $U(\text{eq})$ |
|-------|---------|---------|---------|----------------|
| F(2)  | 3265(1) | 3442(1) | 5279(1) | 16(1)          |
| F(1)  | 1817(1) | 4550(1) | 4076(1) | 16(1)          |
| N(1)  | 4107(2) | 4811(1) | 7532(1) | 18(1)          |
| C(9)  | 4179(2) | 4208(1) | 5177(1) | 11(1)          |
| C(8)  | 5795(2) | 4375(1) | 5716(1) | 11(1)          |
| C(10) | 3402(2) | 4807(1) | 4508(1) | 12(1)          |
| C(1)  | 6704(2) | 3706(1) | 6403(1) | 11(1)          |
| C(2)  | 6212(2) | 3575(1) | 7656(1) | 12(1)          |
| C(6)  | 2146(2) | 5245(1) | 8885(1) | 19(1)          |
| C(7)  | 2804(2) | 5337(1) | 7915(1) | 21(1)          |
| C(3)  | 4768(2) | 4167(1) | 8116(1) | 13(1)          |
| C(4)  | 4205(2) | 4022(1) | 9097(1) | 19(1)          |
| C(5)  | 2863(2) | 4580(1) | 9483(1) | 22(1)          |
| B(9)  | 9938(2) | 3234(1) | 7420(1) | 15(1)          |
| B(4)  | 5494(2) | 2768(1) | 6821(1) | 14(1)          |
| B(6)  | 7176(3) | 1923(1) | 6913(1) | 16(1)          |
| B(10) | 8837(3) | 2243(1) | 7843(1) | 17(1)          |
| B(5)  | 9338(3) | 2377(1) | 6546(1) | 17(1)          |
| B(8)  | 8158(2) | 3294(1) | 8322(1) | 15(1)          |
| B(1)  | 8247(2) | 4078(1) | 7327(1) | 13(1)          |
| B(3)  | 7275(2) | 2700(1) | 5908(1) | 14(1)          |
| B(2)  | 8990(2) | 3506(1) | 6220(1) | 14(1)          |
| B(7)  | 6462(3) | 2490(1) | 8013(1) | 16(1)          |

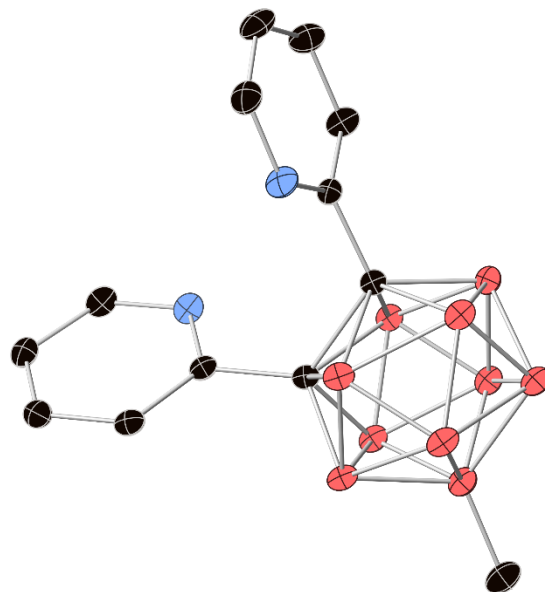

**Figure S6.** Single crystal X-ray structure of **2I**. H-atoms omitted for clarity.

**Table S14.** Crystal data and structure refinement for **2I**.

|                                   |                                                                |          |
|-----------------------------------|----------------------------------------------------------------|----------|
| Compound                          | <b>2I</b>                                                      |          |
| Empirical formula                 | C <sub>13</sub> H <sub>20</sub> B <sub>10</sub> N <sub>2</sub> |          |
| Formula weight                    | 312.41                                                         |          |
| Temperature                       | 100.0 K                                                        |          |
| Wavelength                        | 0.71073 Å                                                      |          |
| Crystal system                    | Orthorhombic                                                   |          |
| Space group                       | Pbca                                                           |          |
| Unit cell dimensions              | a = 12.747(3) Å                                                | α = 90°. |
|                                   | b = 14.141(4) Å                                                | β = 90°. |
|                                   | c = 18.749(5) Å                                                | γ = 90°. |
| Volume                            | 3379.4(15) Å <sup>3</sup>                                      |          |
| Z                                 | 8                                                              |          |
| Density (calculated)              | 1.228 Mg/m <sup>3</sup>                                        |          |
| Absorption coefficient            | 0.063 mm <sup>-1</sup>                                         |          |
| F(000)                            | 1296                                                           |          |
| Crystal size                      | 0.27 x 0.25 x 0.22 mm <sup>3</sup>                             |          |
| Theta range for data collection   | 2.410 to 30.311°.                                              |          |
| Index ranges                      | -16 ≤ h ≤ 18, -15 ≤ k ≤ 16, -17 ≤ l ≤ 24                       |          |
| Reflections collected             | 16565                                                          |          |
| Independent reflections           | 3733 [R(int) = 0.0416]                                         |          |
| Completeness to theta = 25.242°   | 99.1 %                                                         |          |
| Absorption correction             | Semi-empirical from equivalents                                |          |
| Max. and min. transmission        | 0.7455 and 0.6984                                              |          |
| Refinement method                 | Full-matrix least-squares on F <sup>2</sup>                    |          |
| Data / restraints / parameters    | 3733 / 0 / 227                                                 |          |
| Goodness-of-fit on F <sup>2</sup> | 1.078                                                          |          |
| Final R indices [I > 2σ(I)]       | R1 = 0.0523, wR2 = 0.1442                                      |          |
| R indices (all data)              | R1 = 0.0648, wR2 = 0.1559                                      |          |
| Extinction coefficient            | n/a                                                            |          |
| Largest diff. peak and hole       | 0.783 and -0.390 e.Å <sup>-3</sup>                             |          |

**Table S15.** Atomic coordinates ( $\times 10^4$ ) and equivalent isotropic displacement parameters ( $\text{\AA}^2 \times 10^3$ ) for spok121\_a (**2I**).  $U(\text{eq})$  is defined as one third of the trace of the orthogonalized  $U^{ij}$  tensor.

|       | x       | y       | z       | $U(\text{eq})$ |
|-------|---------|---------|---------|----------------|
| N(1)  | 5344(1) | 8076(1) | 4433(1) | 20(1)          |
| N(2)  | 3205(1) | 6177(1) | 4603(1) | 19(1)          |
| C(13) | 3681(1) | 6055(1) | 3990(1) | 14(1)          |
| C(4)  | 4423(1) | 8317(1) | 4385(1) | 14(1)          |
| C(12) | 4230(1) | 5177(1) | 3841(1) | 17(1)          |
| C(2)  | 3575(1) | 6922(1) | 3446(1) | 14(1)          |
| C(1)  | 3977(1) | 8125(1) | 3666(1) | 13(1)          |
| C(11) | 4272(1) | 4383(1) | 4346(1) | 19(1)          |
| C(10) | 3783(1) | 4496(1) | 4978(1) | 19(1)          |
| C(5)  | 3917(1) | 8774(1) | 4935(1) | 21(1)          |
| C(9)  | 3268(1) | 5409(1) | 5084(1) | 21(1)          |
| C(8)  | 5779(1) | 8300(1) | 5051(1) | 23(1)          |
| C(7)  | 5330(1) | 8750(1) | 5629(1) | 24(1)          |
| C(6)  | 4382(1) | 8995(1) | 5569(1) | 24(1)          |
| C(3)  | 2499(1) | 7382(1) | 1367(1) | 25(1)          |
| B(4)  | 2770(1) | 7907(1) | 3633(1) | 14(1)          |
| B(3)  | 4602(1) | 7379(1) | 3053(1) | 16(1)          |
| B(5)  | 3722(1) | 6702(1) | 2555(1) | 16(1)          |
| B(8)  | 2412(1) | 8387(1) | 2790(1) | 17(1)          |
| B(9)  | 2596(1) | 7024(1) | 2912(1) | 16(1)          |
| B(2)  | 4414(1) | 8748(1) | 2932(1) | 17(1)          |
| B(6)  | 4242(1) | 7865(1) | 2213(1) | 17(1)          |
| B(7)  | 3428(1) | 8913(1) | 2350(1) | 18(1)          |
| B(10) | 2993(1) | 7639(1) | 2108(1) | 17(1)          |
| B(1)  | 3283(1) | 9066(1) | 3287(1) | 16(1)          |

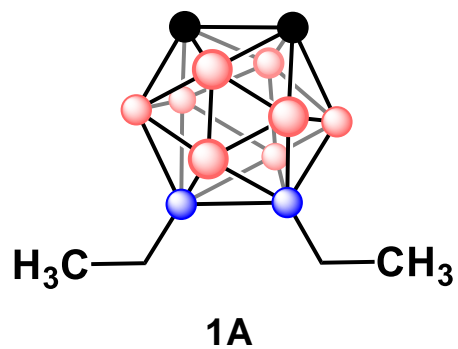

— 3.38

0.87  
0.85  
0.69

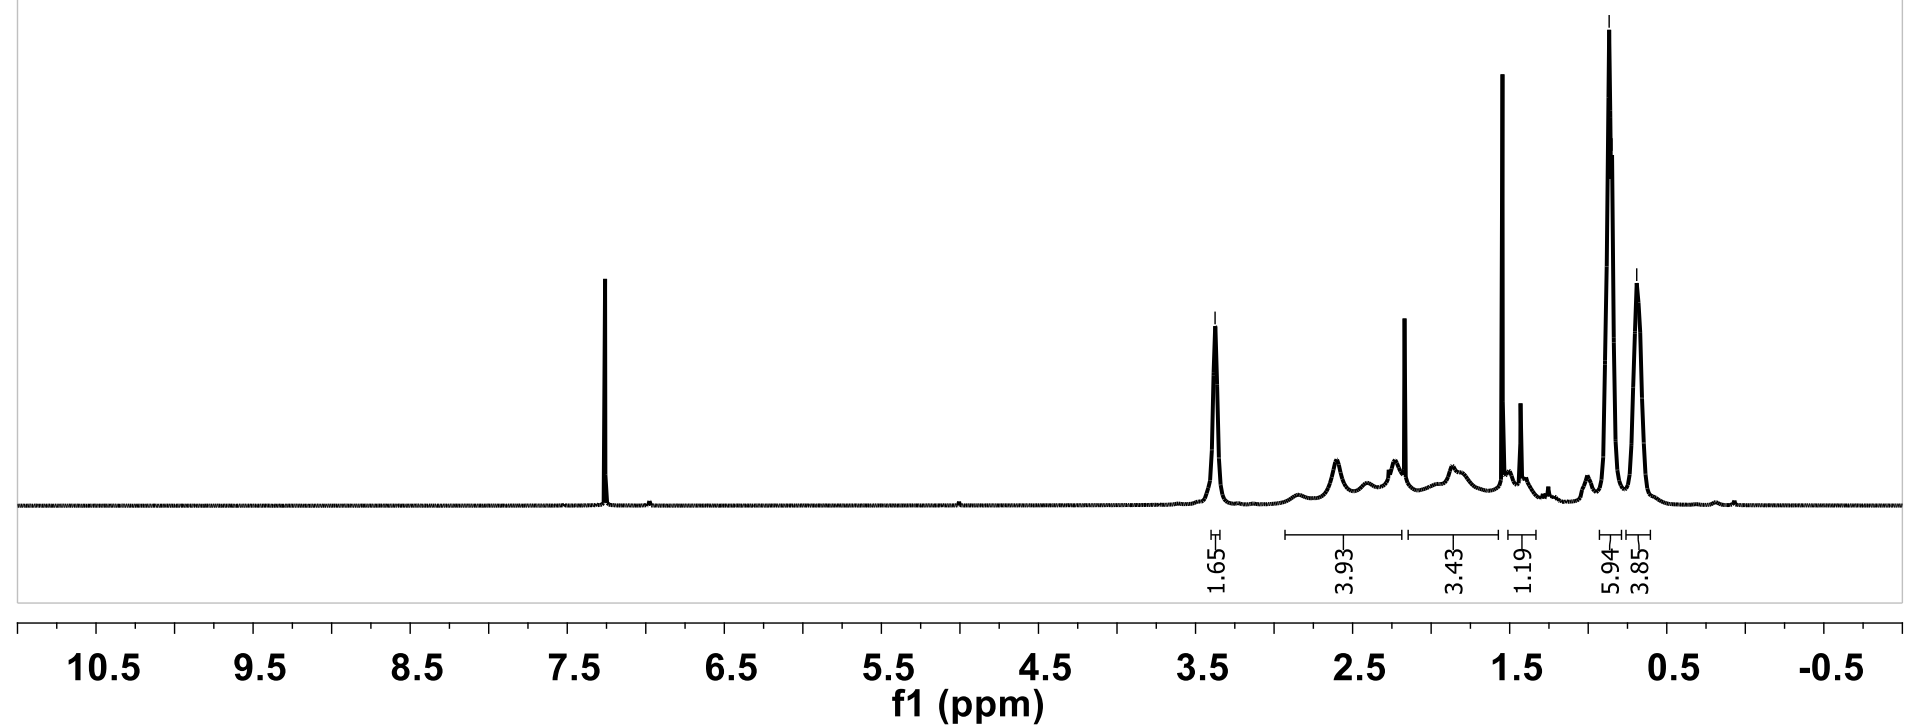

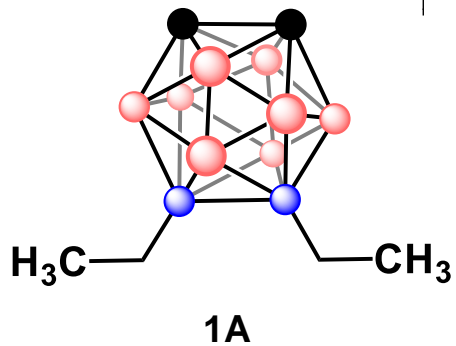

— 9.14

- 8.40
- 9.55
- 14.24
- 15.50
- 16.11
- 17.54

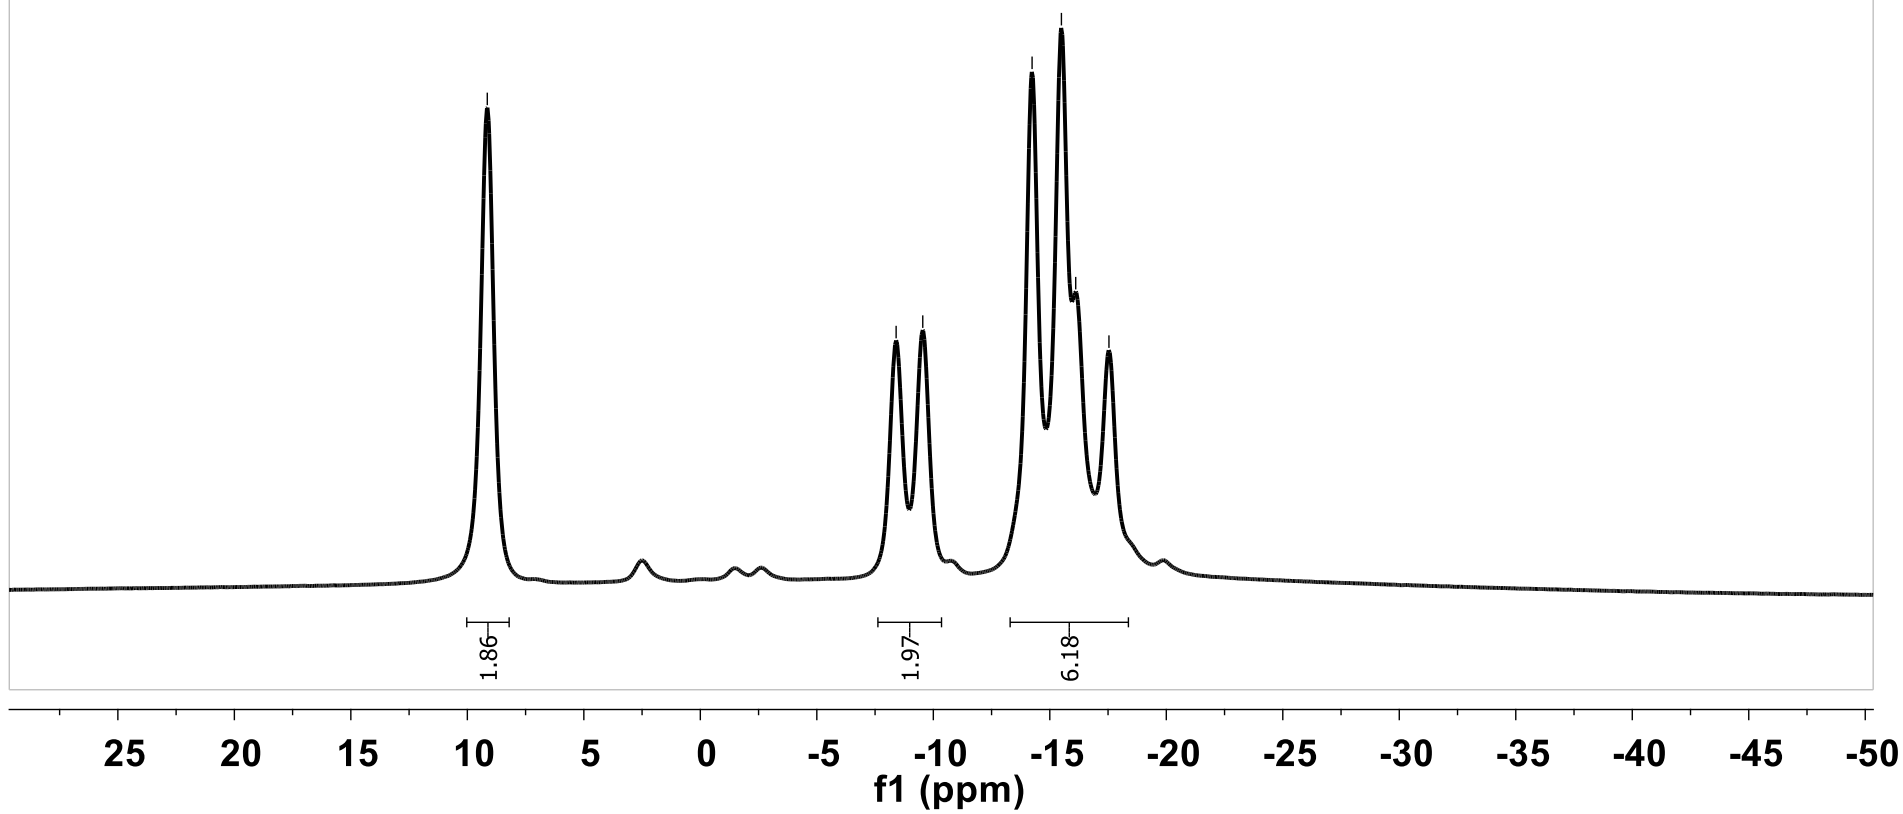

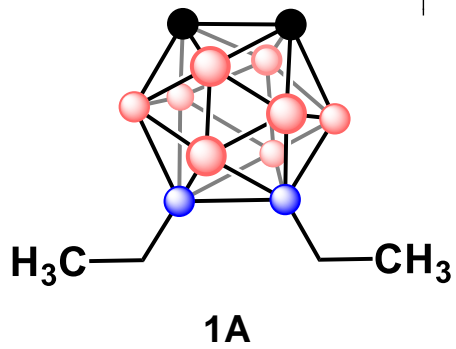

— 9.14

— -8.97

— -14.86

— -16.84

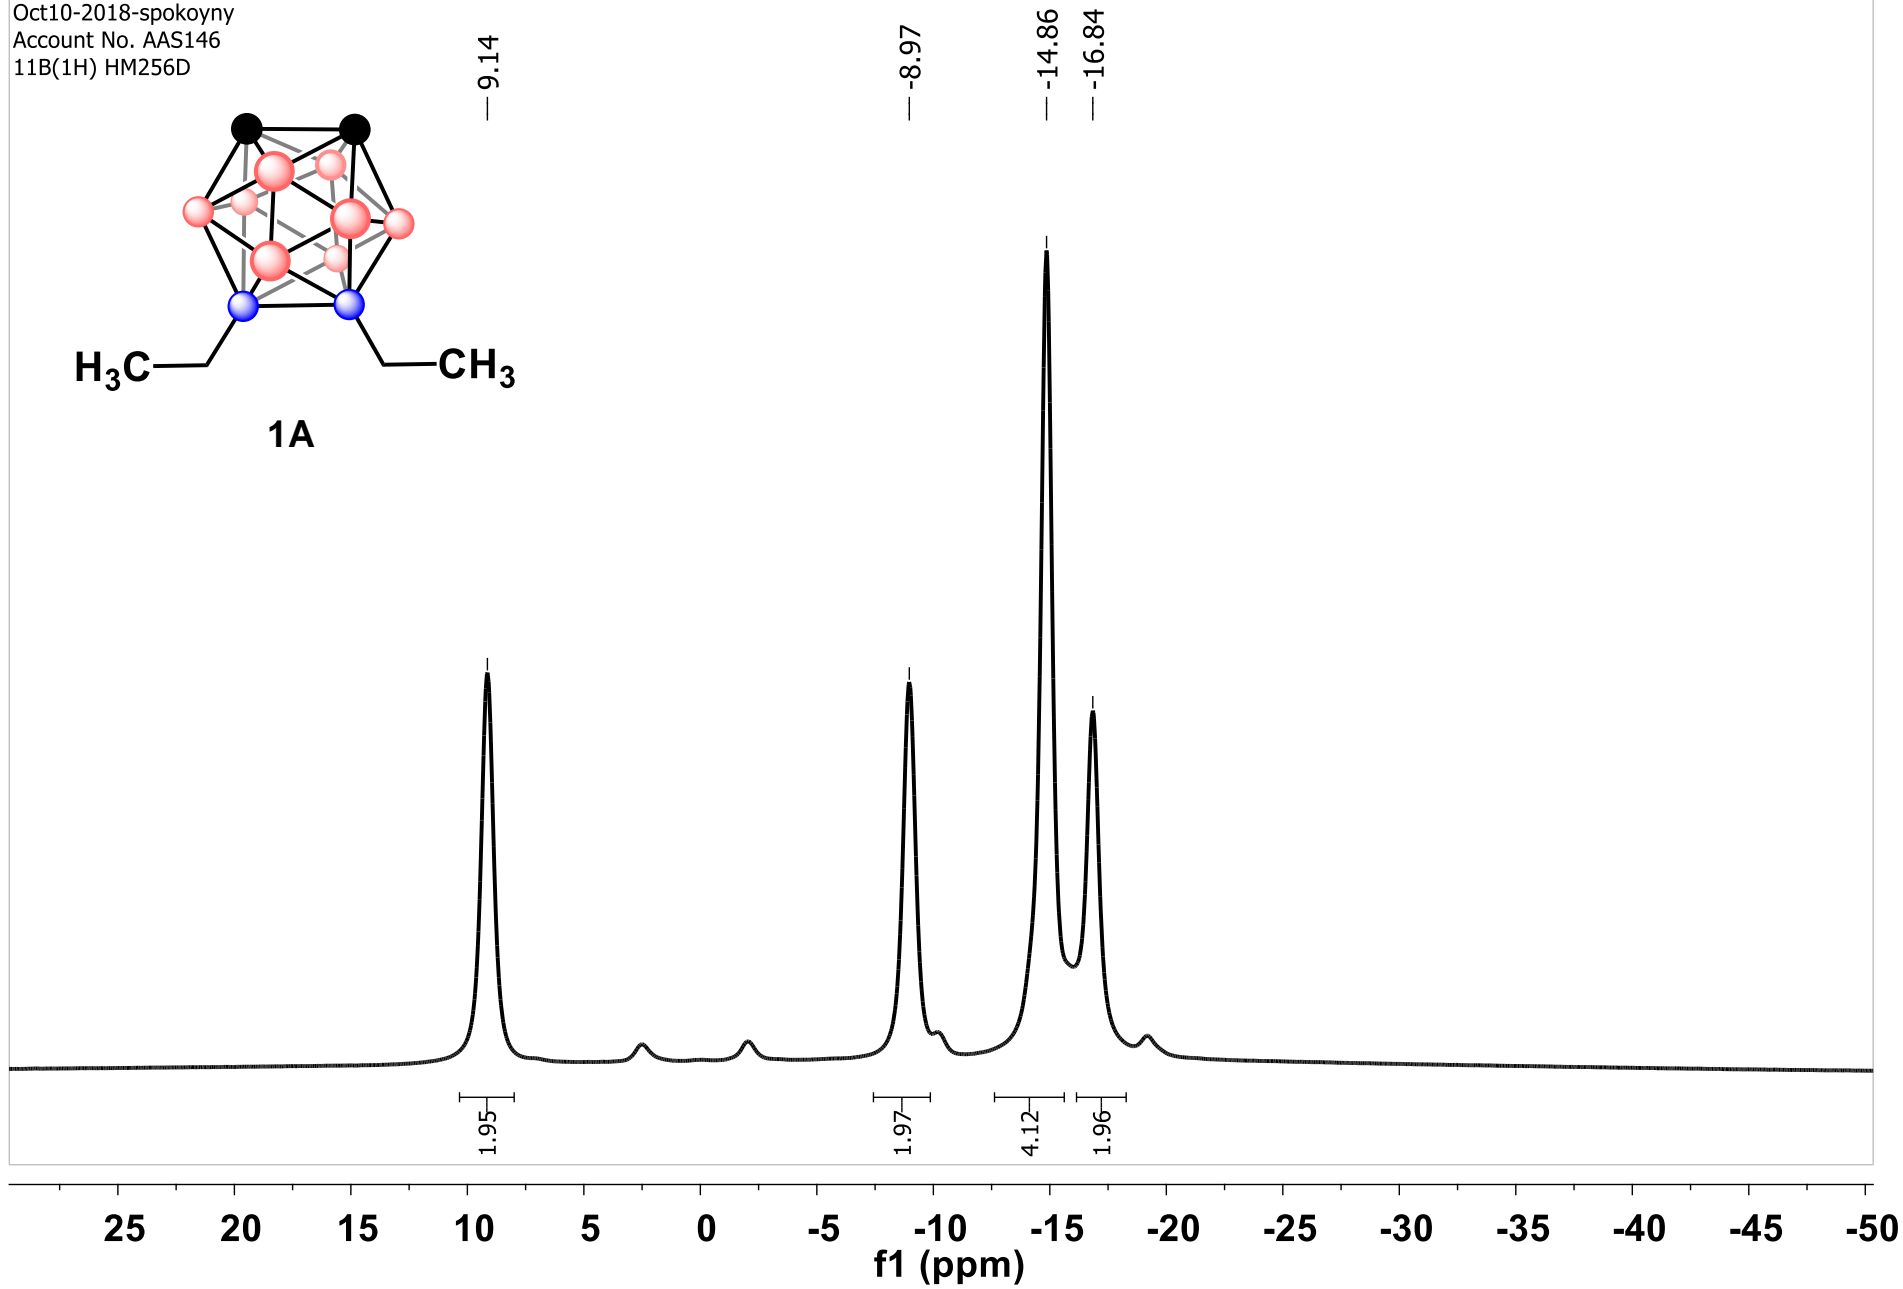

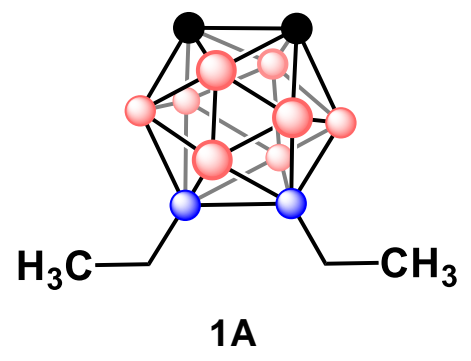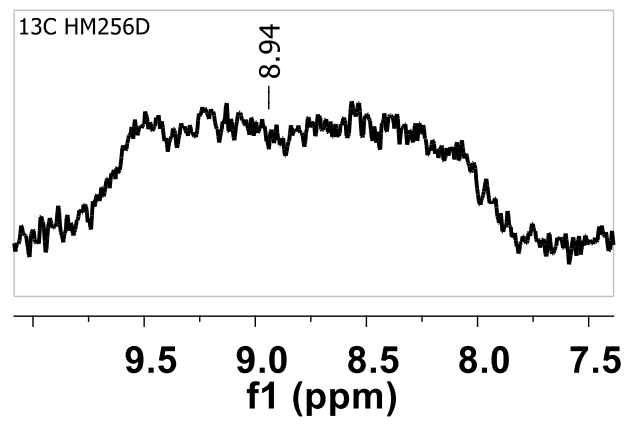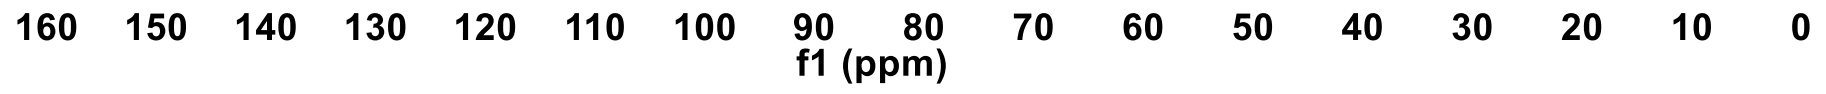





Oct05-2018-spokoyny  
Account No. AAS146  
1H HM256B

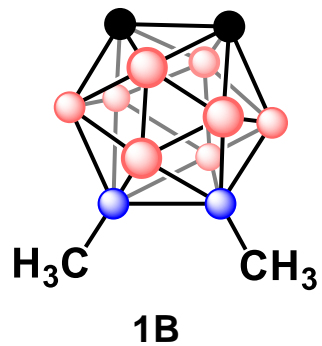

— 3.34

— 0.20

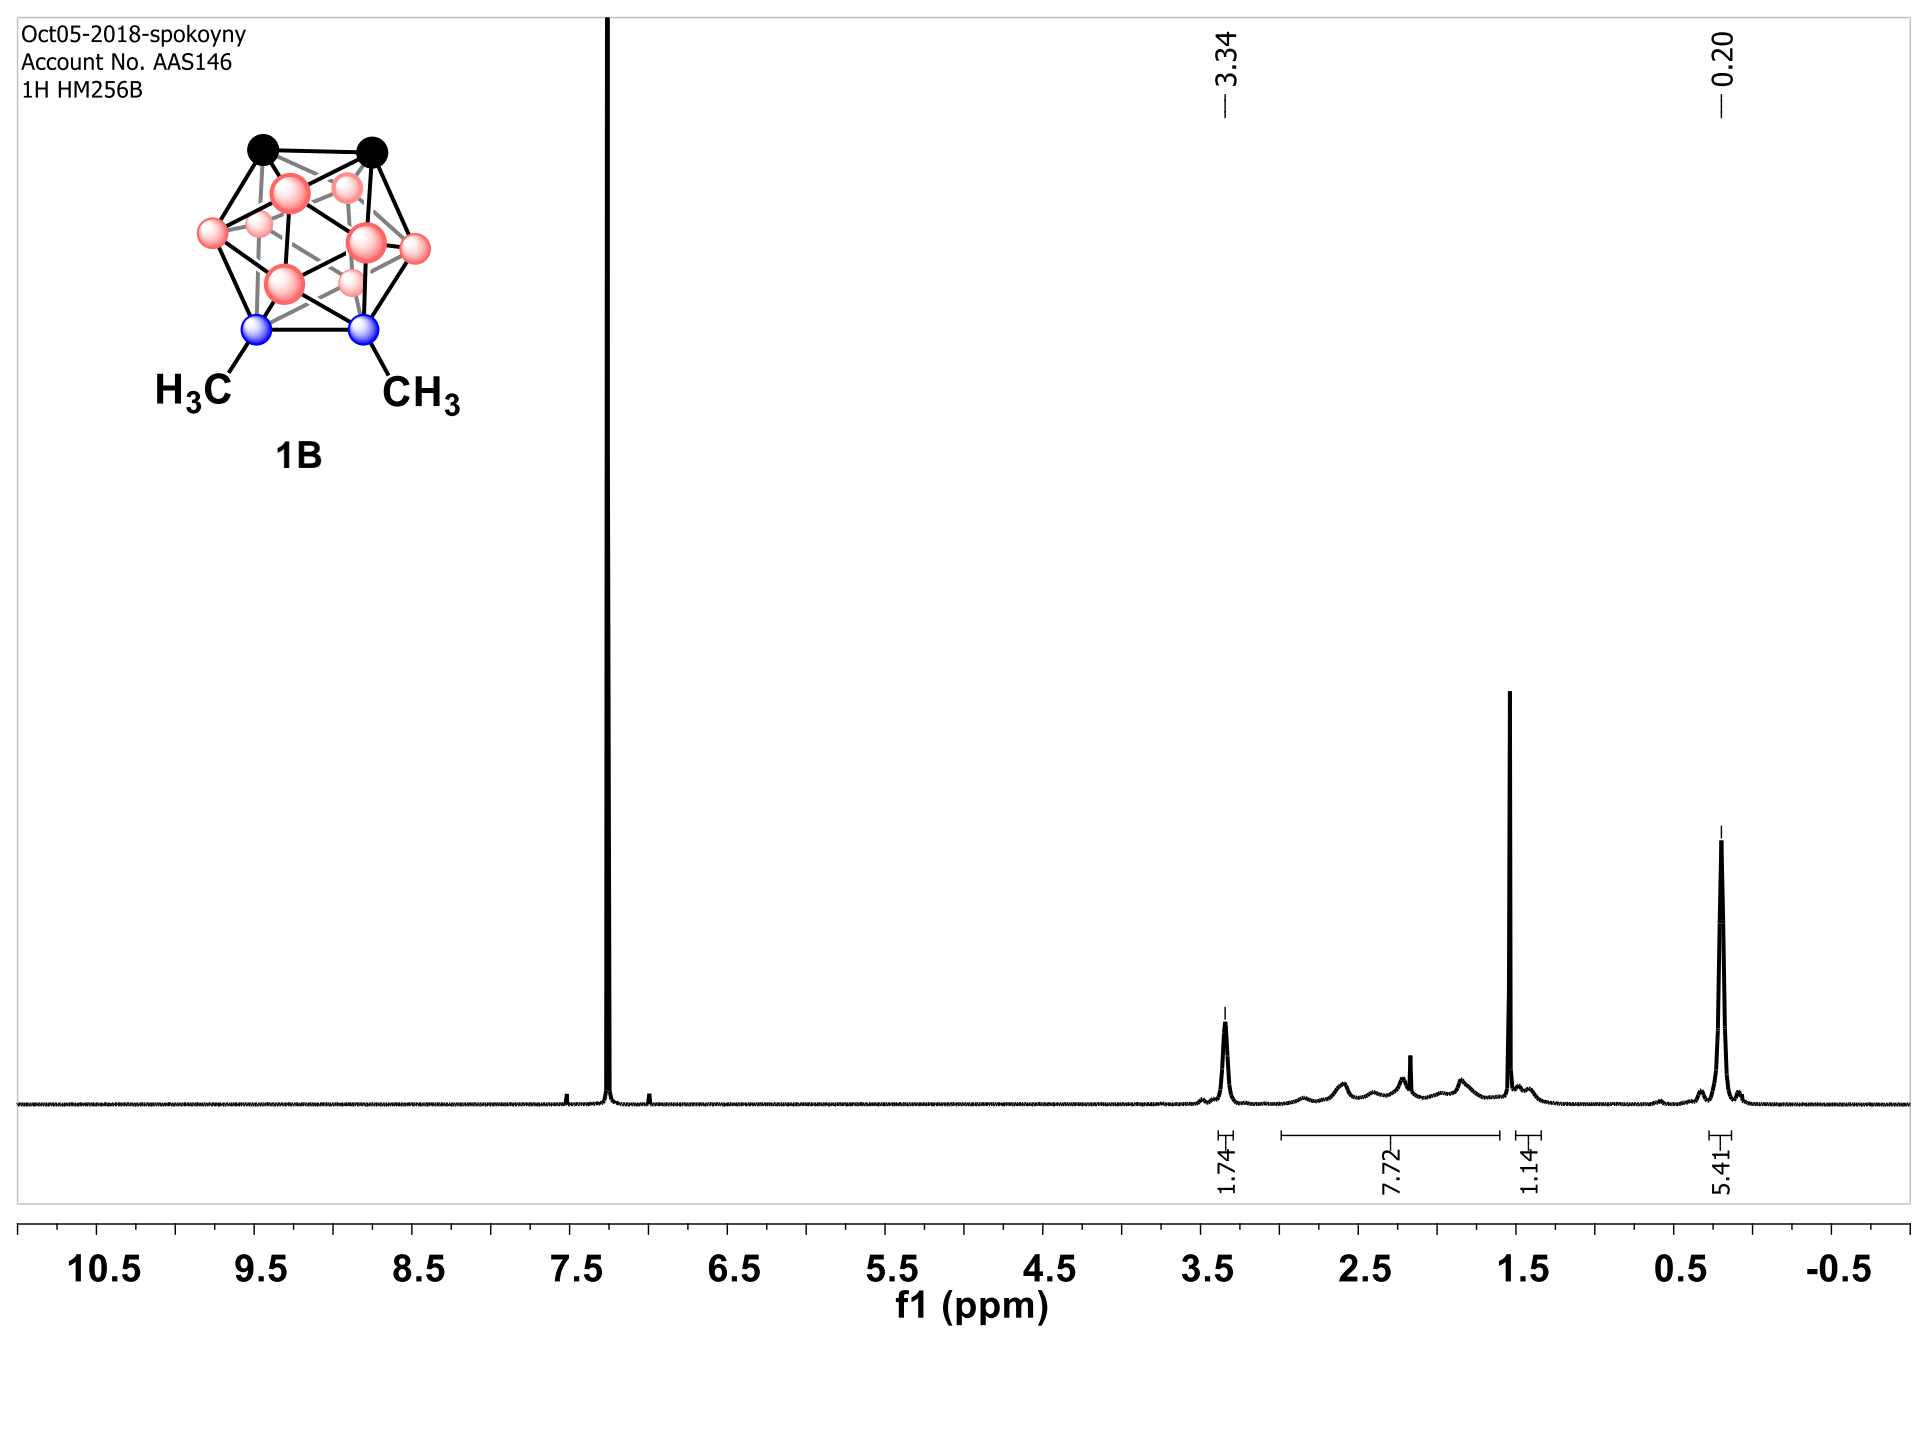

10.5

9.5

8.5

7.5

6.5

5.5

4.5

3.5

2.5

1.5

0.5

-0.5

f1 (ppm)



-7.13

-7.09

-8.22

-13.51

-14.77

-15.97

-17.33

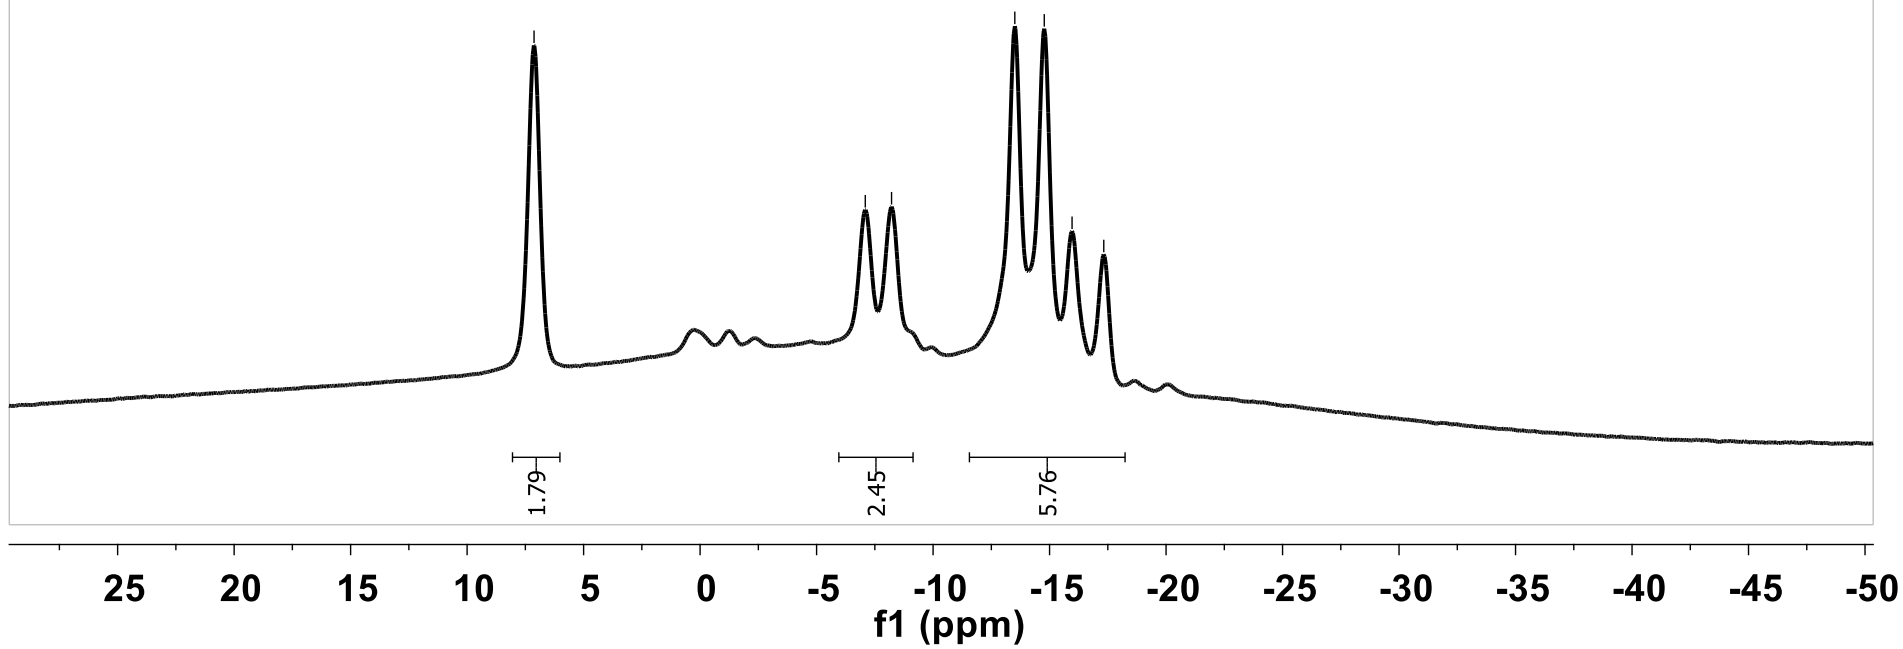

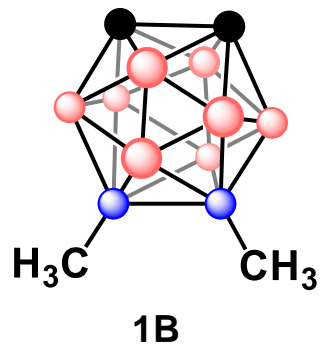

-7.13

-7.66

-14.14

-16.64

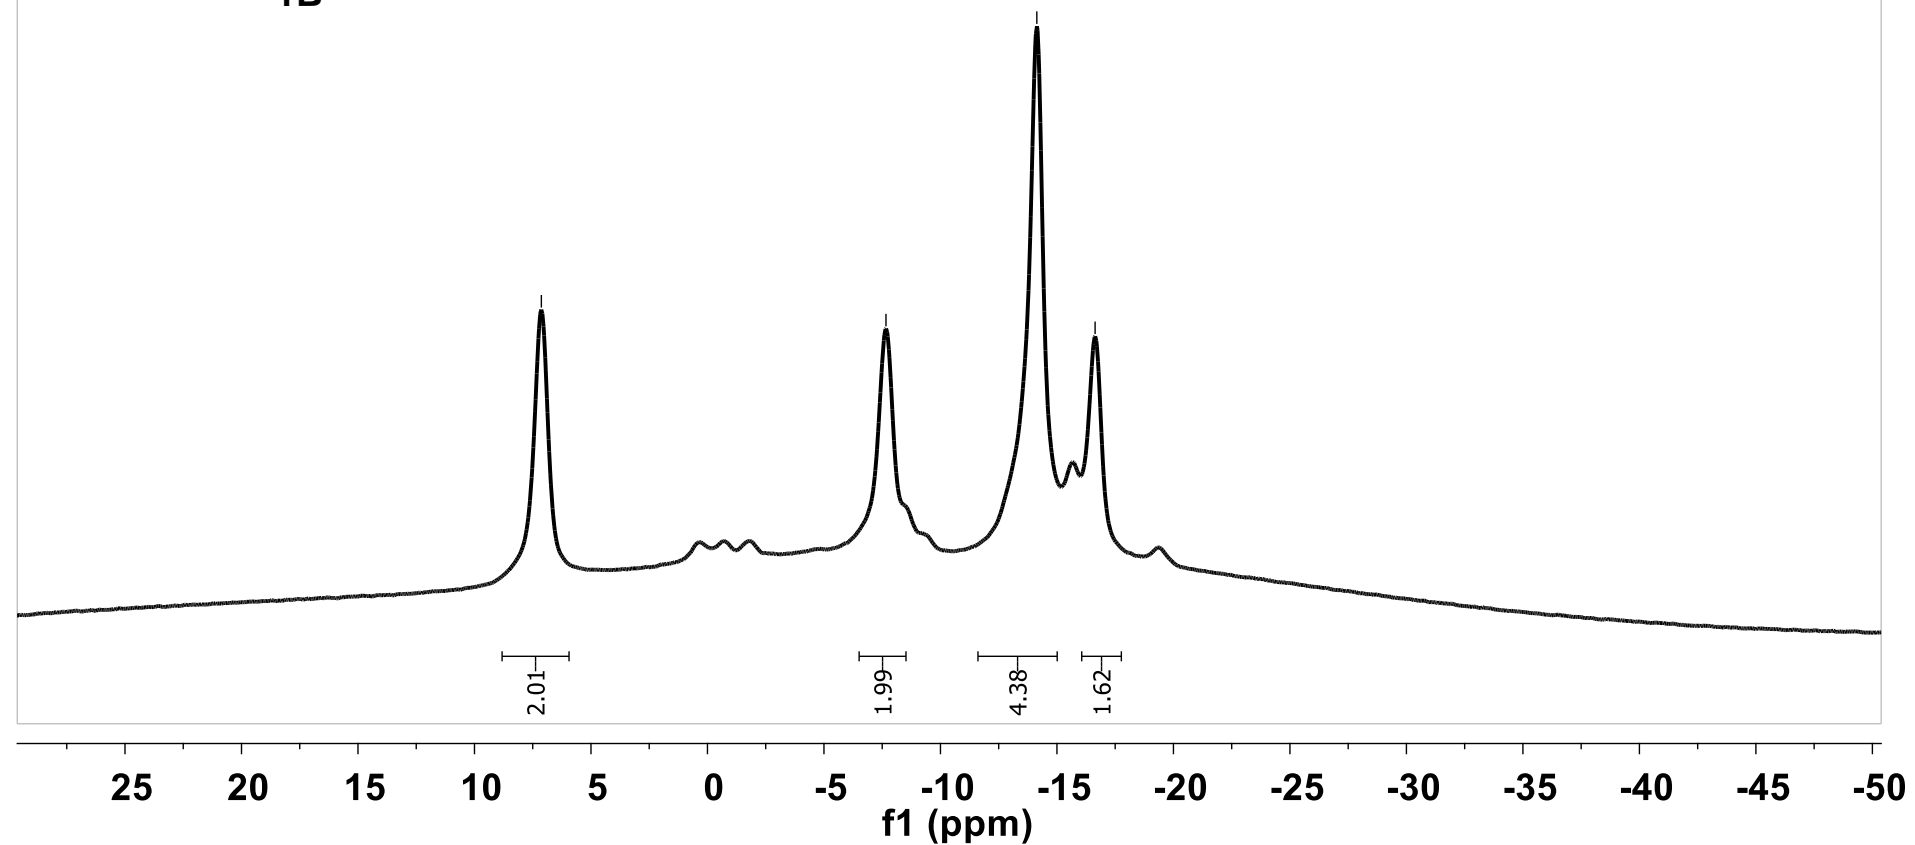

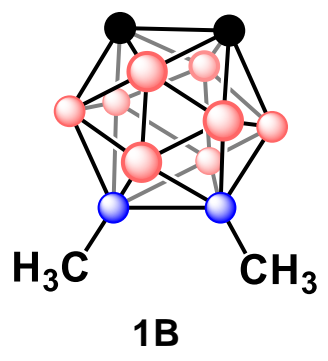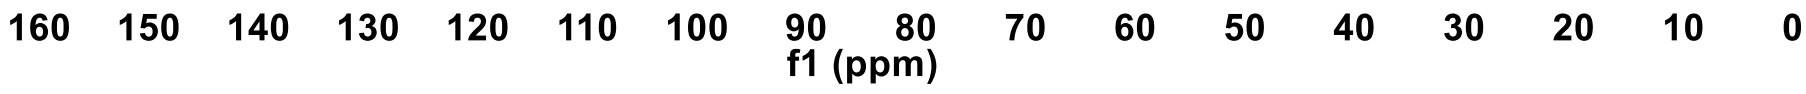

—47.38



Oct03-2018-spokoyny  
Account No. AAS146  
1H HM256G

7.17  
7.16  
7.05  
7.04  
7.03

4.64

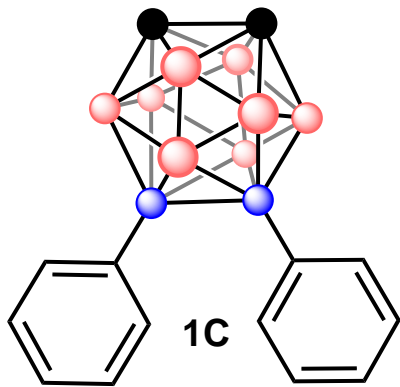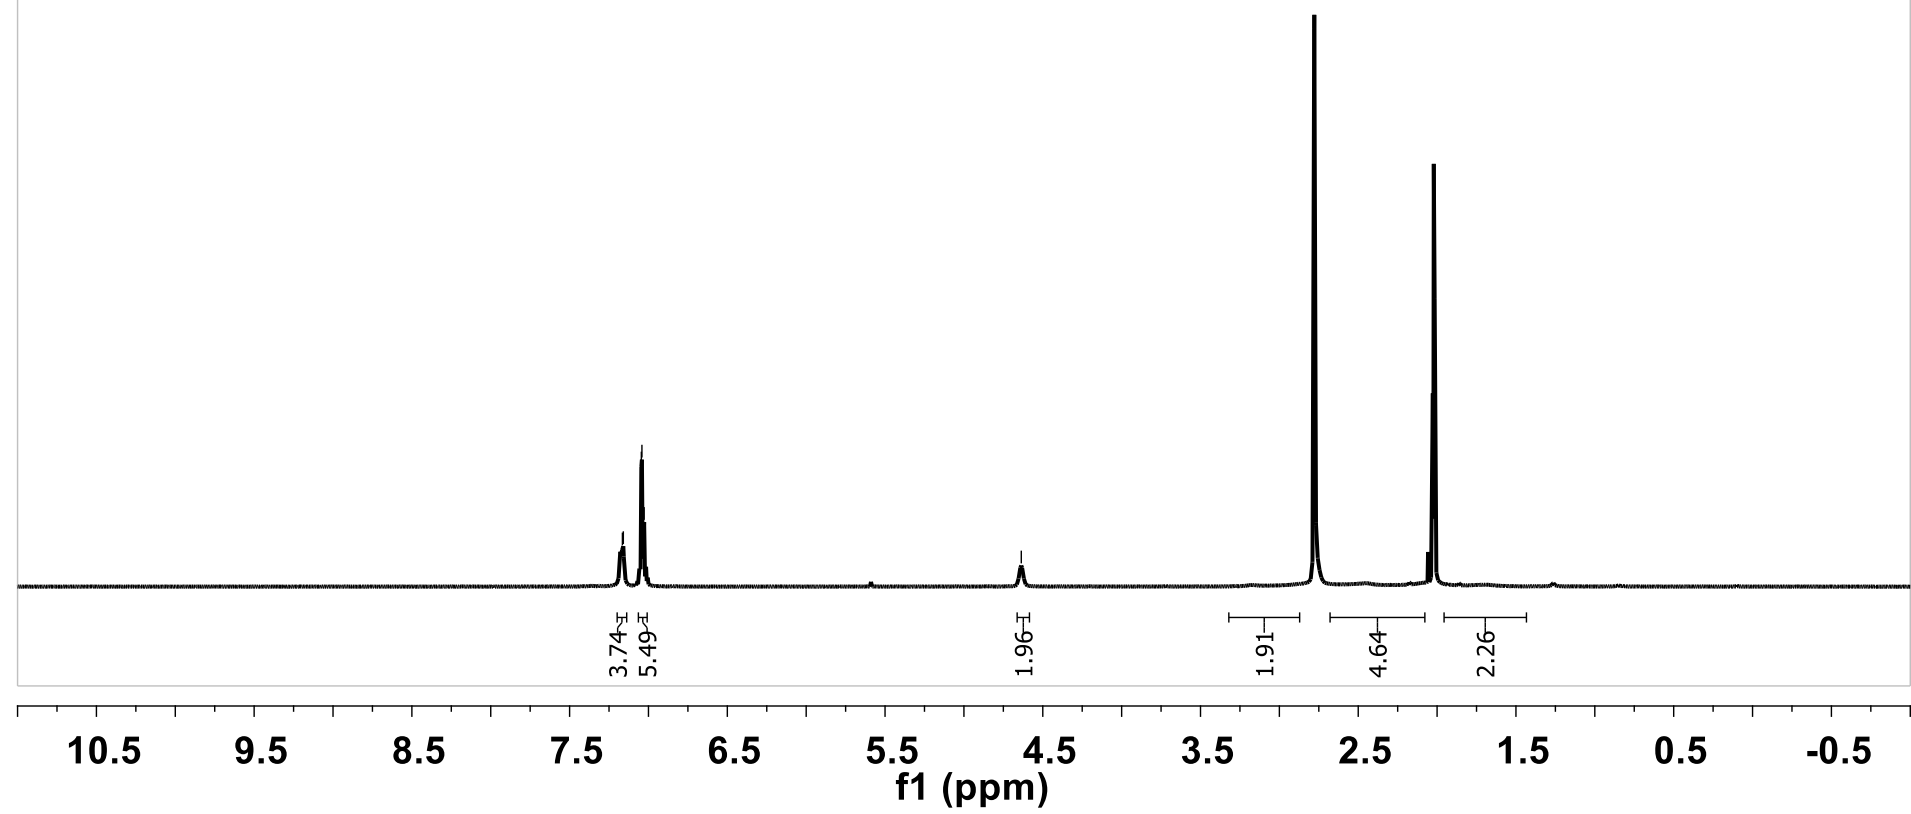

Oct03-2018-spokoyny  
Account No. AAS146  
11B HM256G

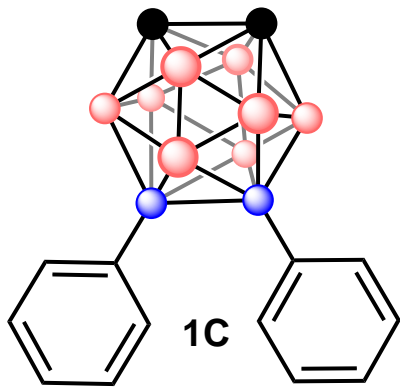

-7.02

-9.38  
-10.51  
-13.54  
-14.81  
-17.08

25 20 15 10 5 0 -5 -10 -15 -20 -25 -30 -35 -40 -45 -50  
f1 (ppm)

1.71

2.49

5.80

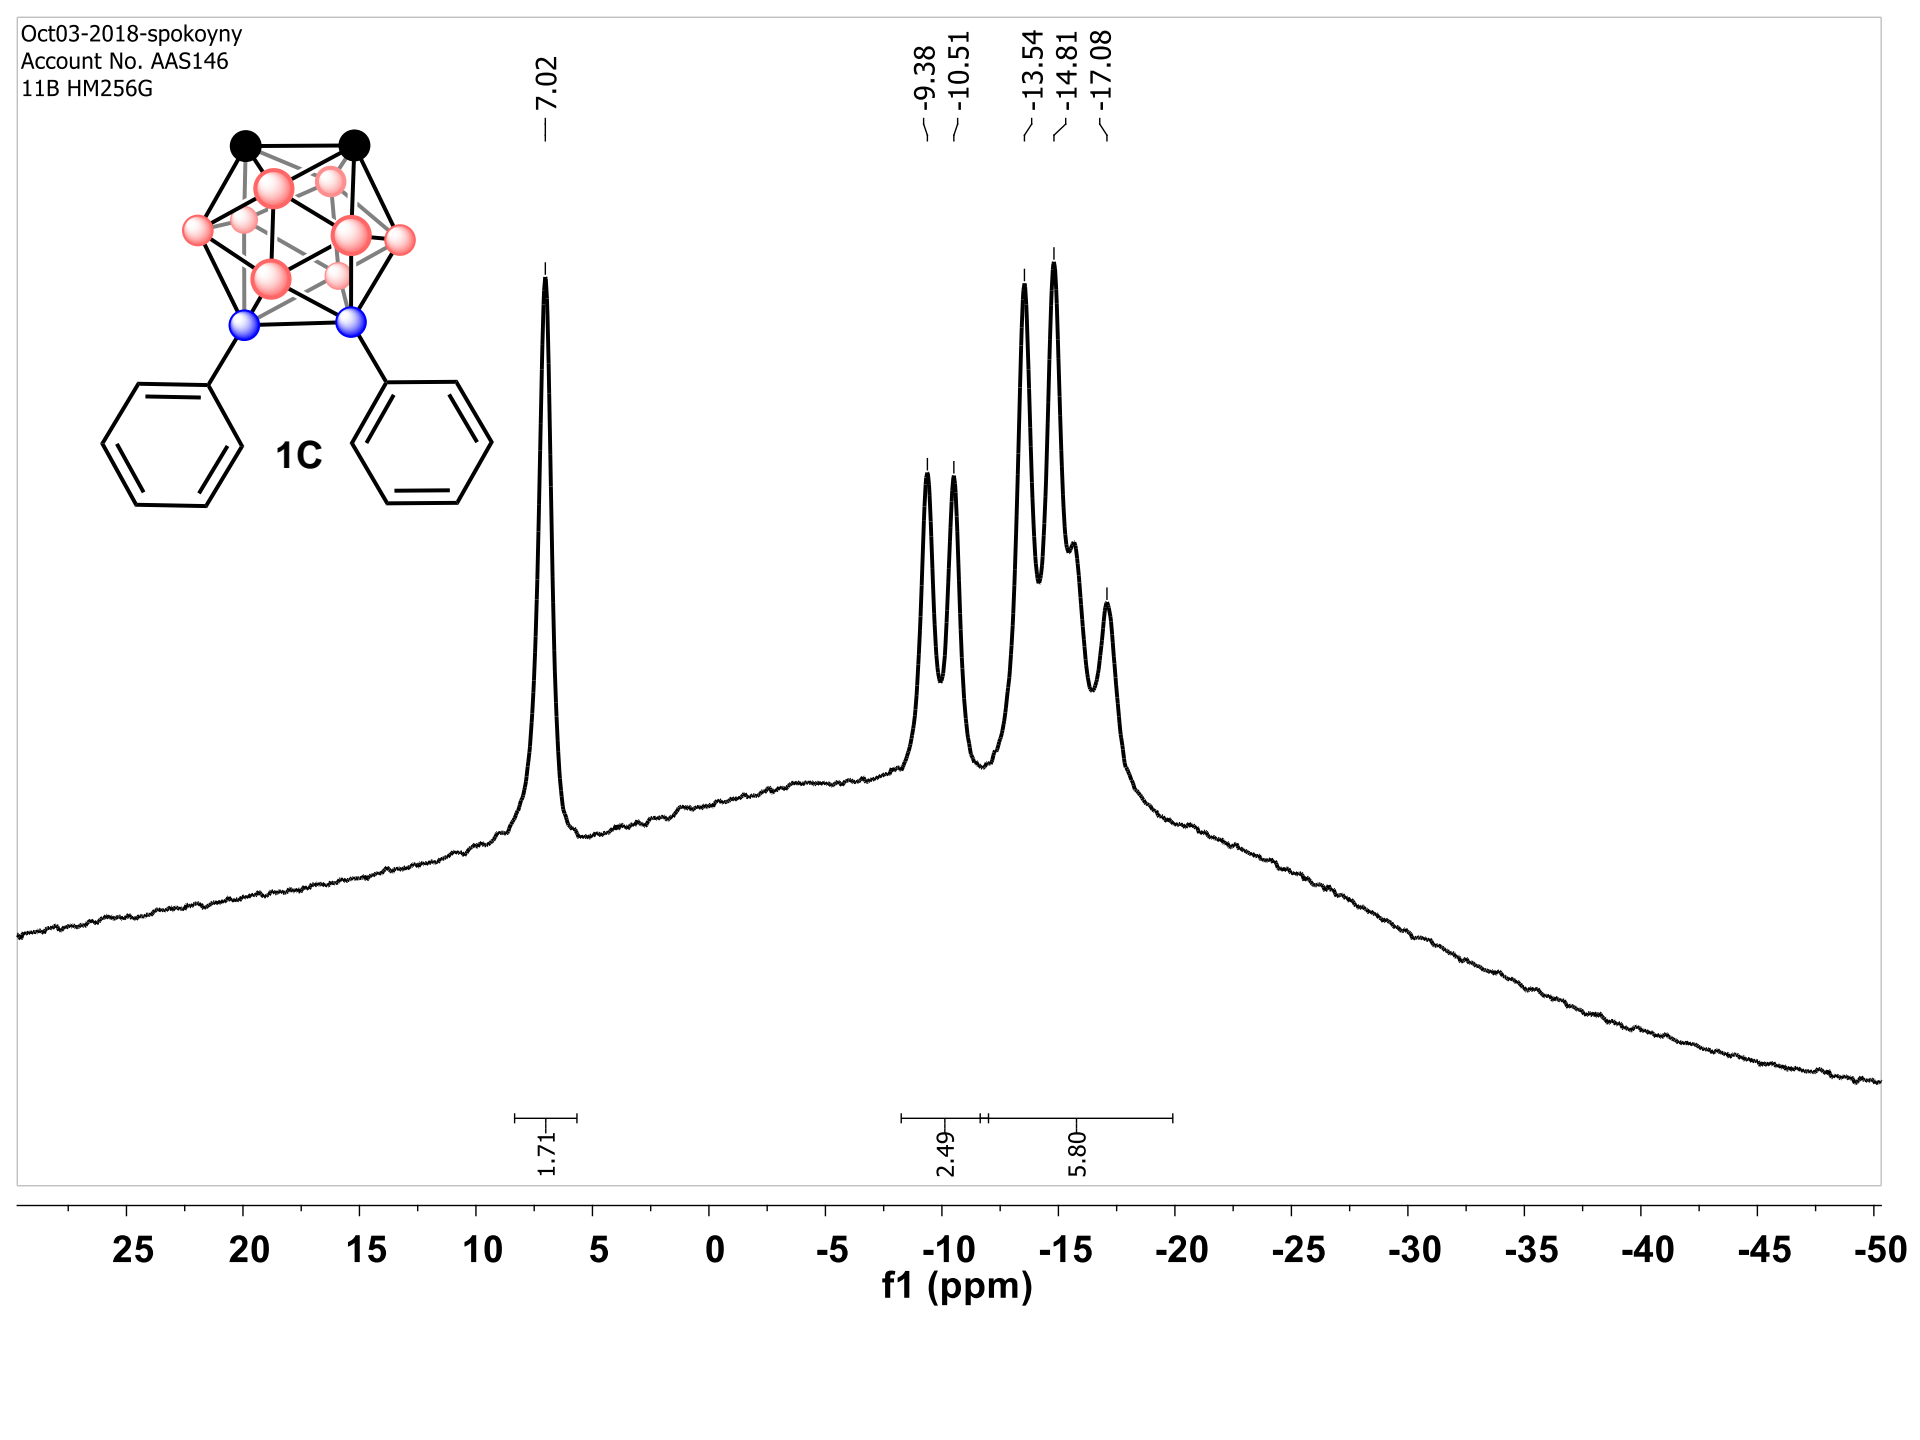

Oct10-2018-spokoyny  
Account No. AAS146  
11B(1H) HM256G

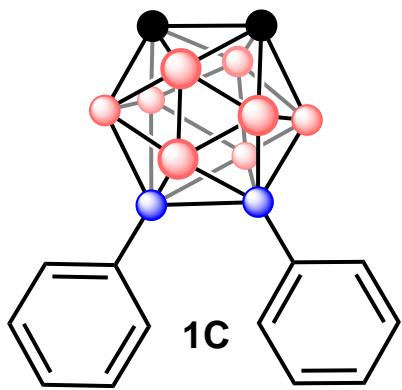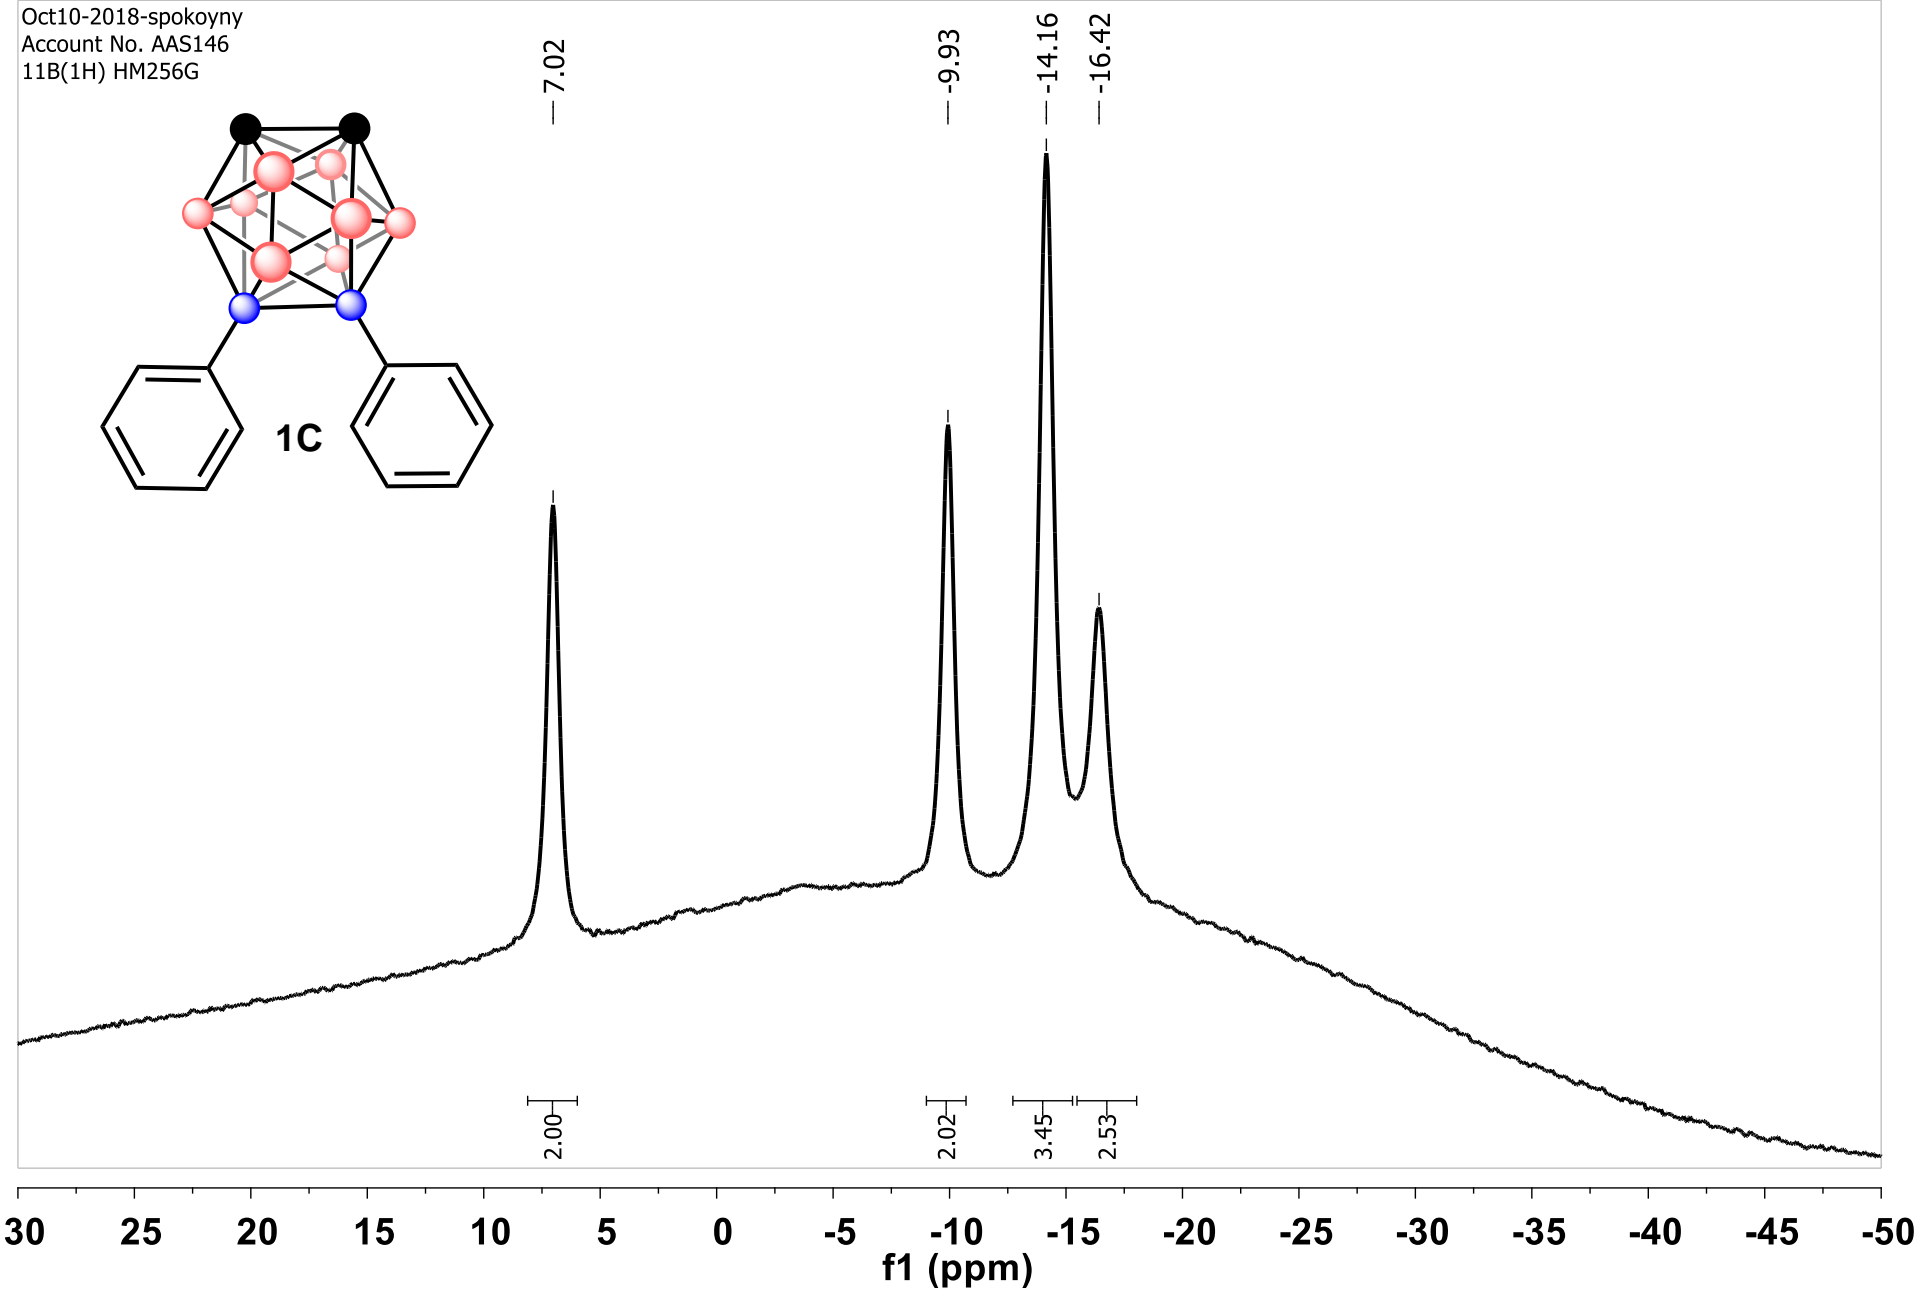



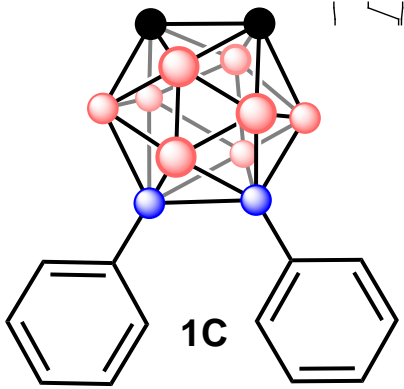

— 132.75  
└ 127.01  
└ 126.76

— 50.88

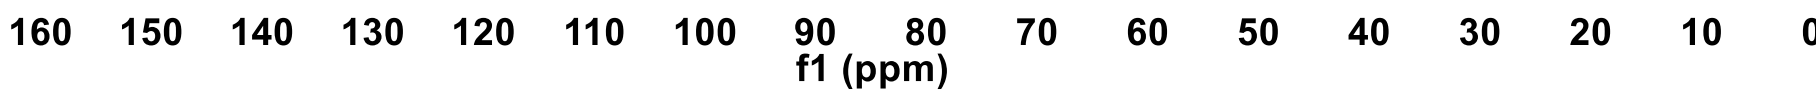

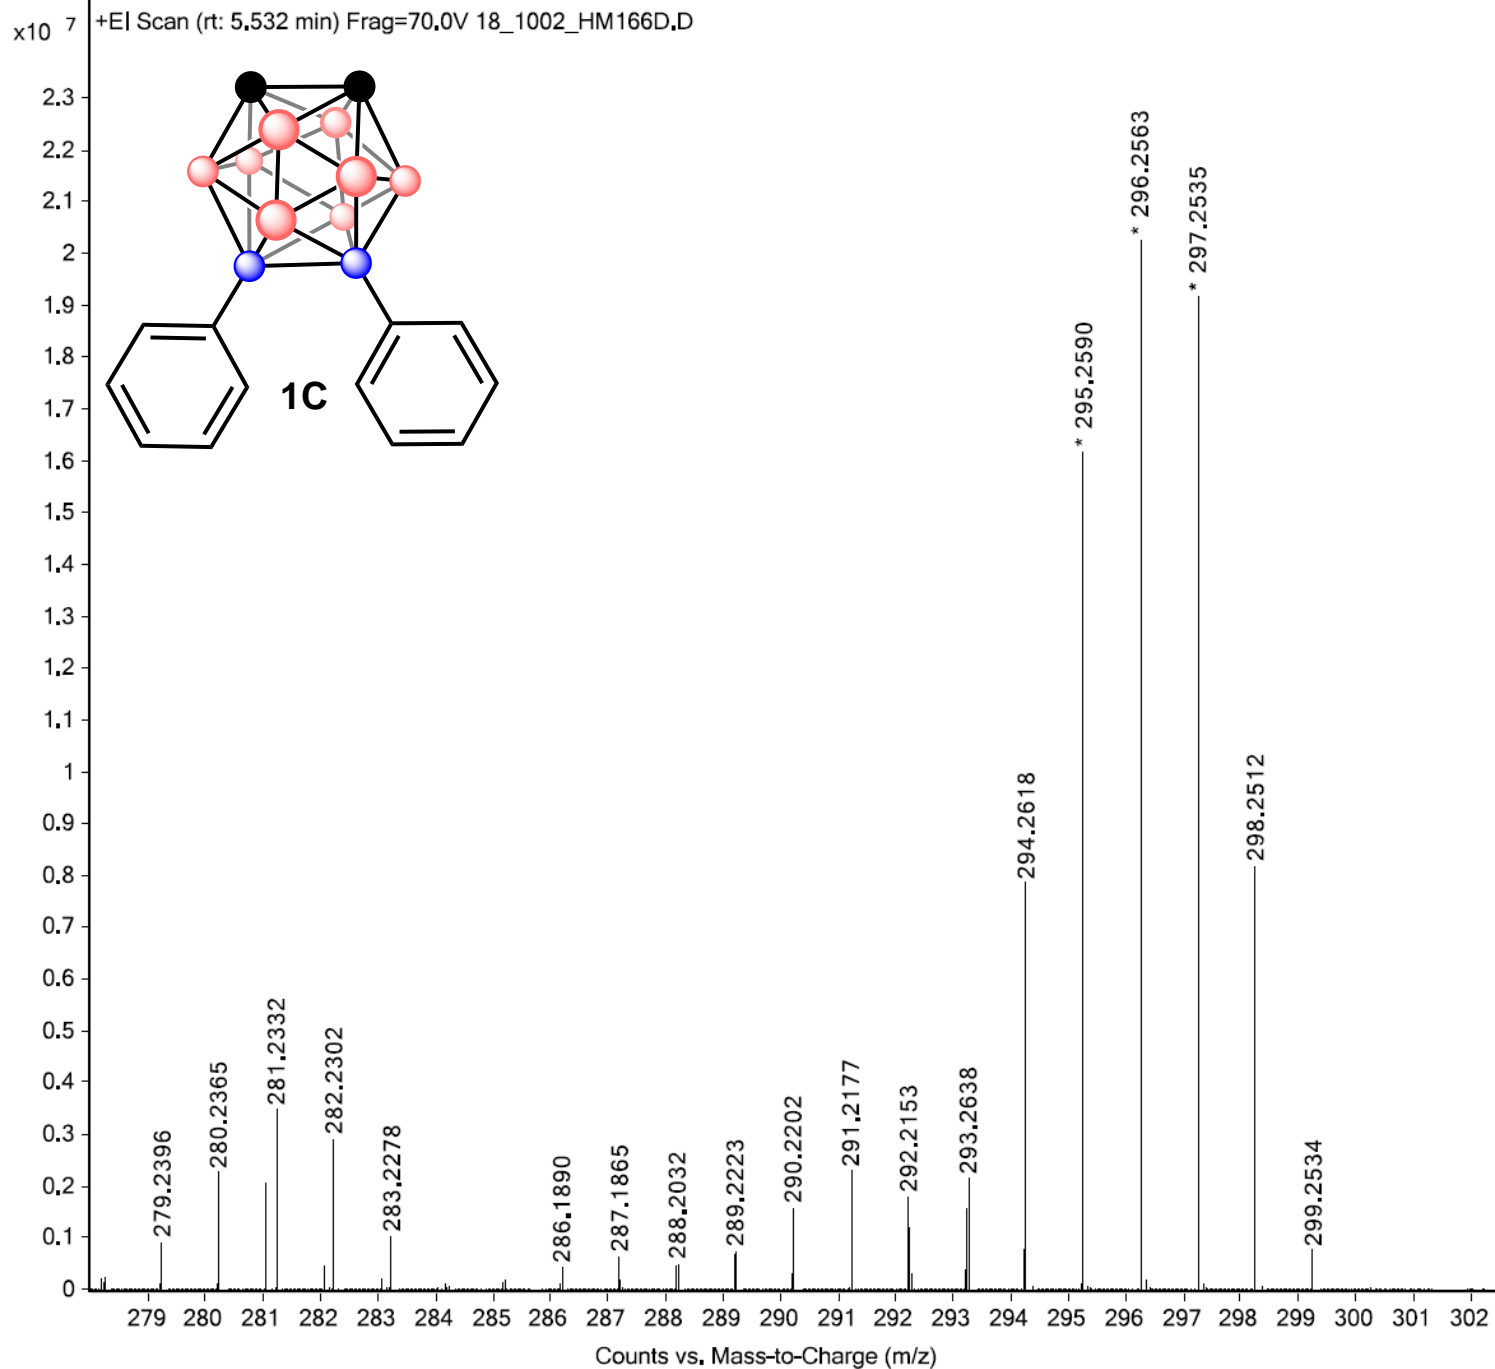

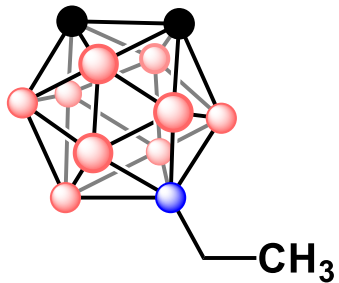

1D

3.48  
3.41

0.86  
0.72

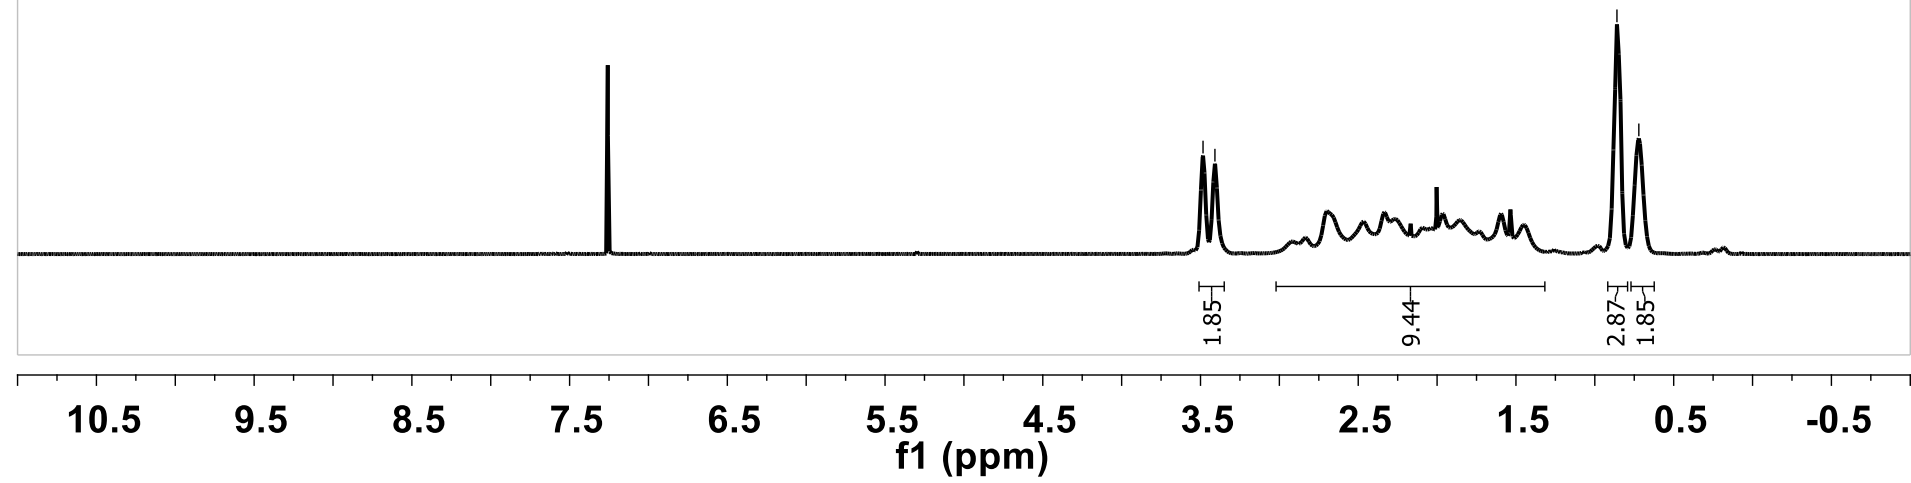

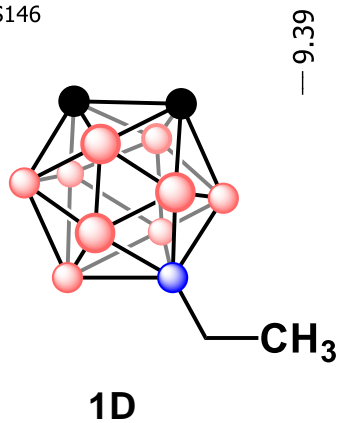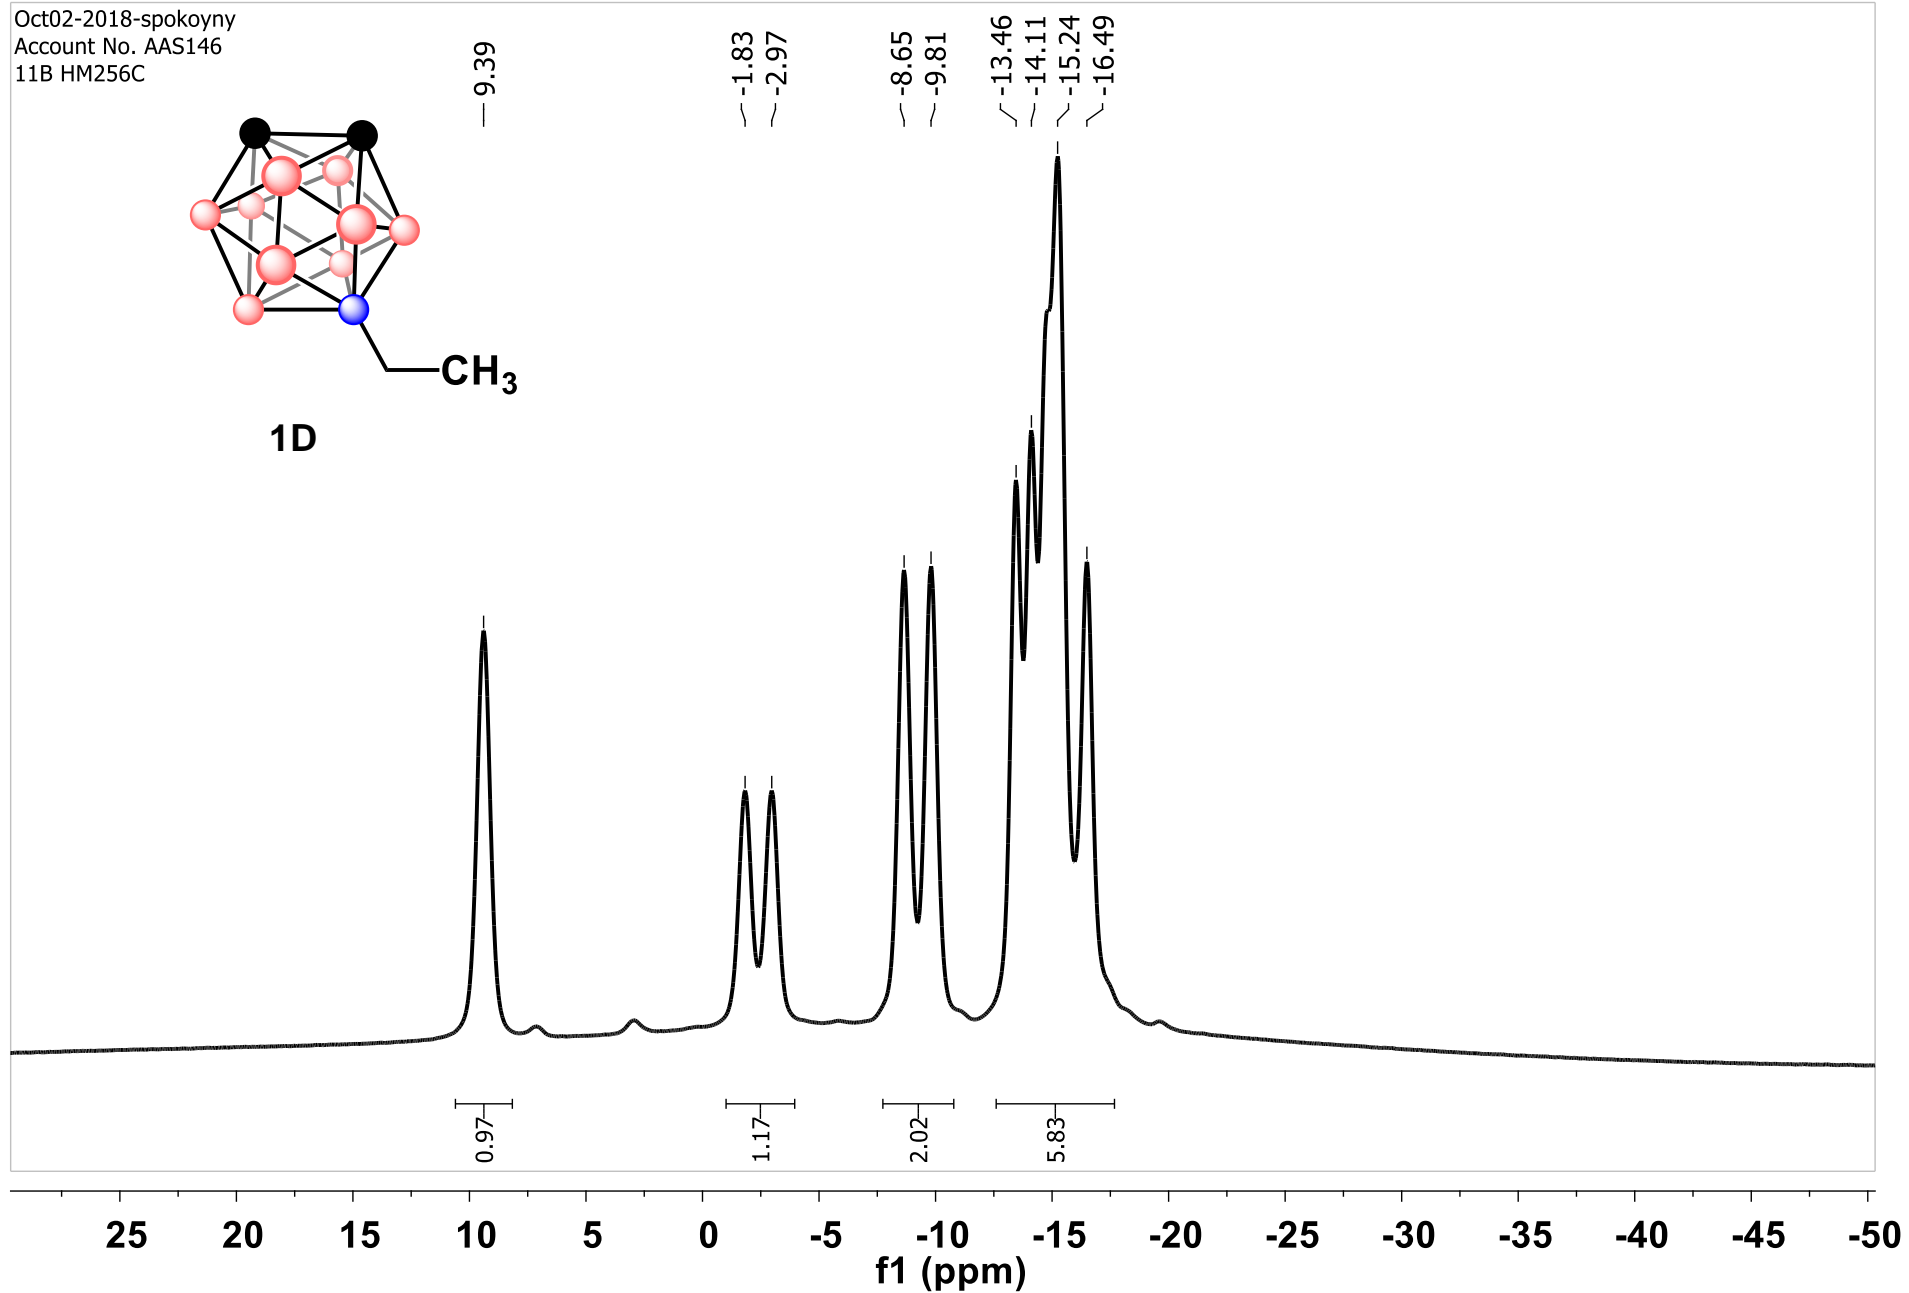

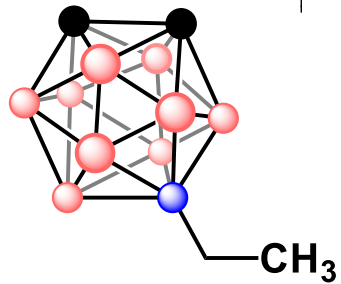

9.39

2.42

9.24

14.10

14.75

15.82

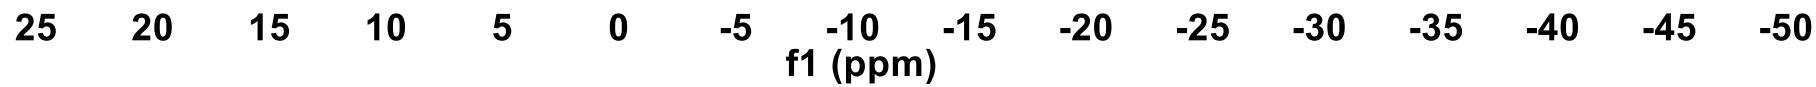

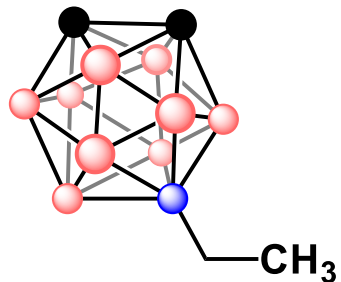

1D

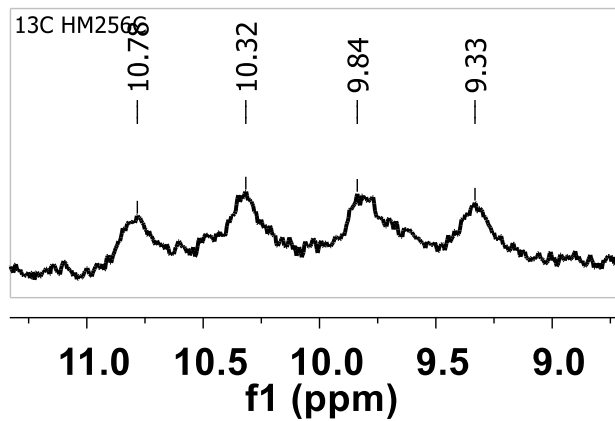

— 53.11

— 47.80

— 13.45

— 10.78

— 10.32

— 9.84

— 9.33

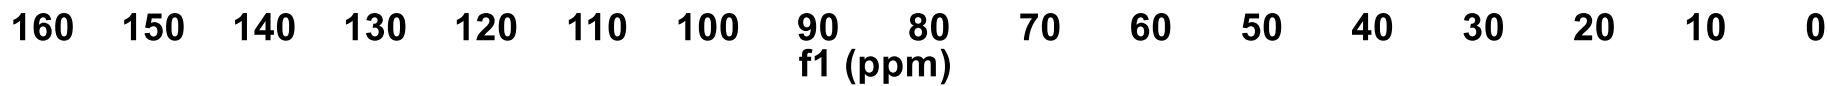

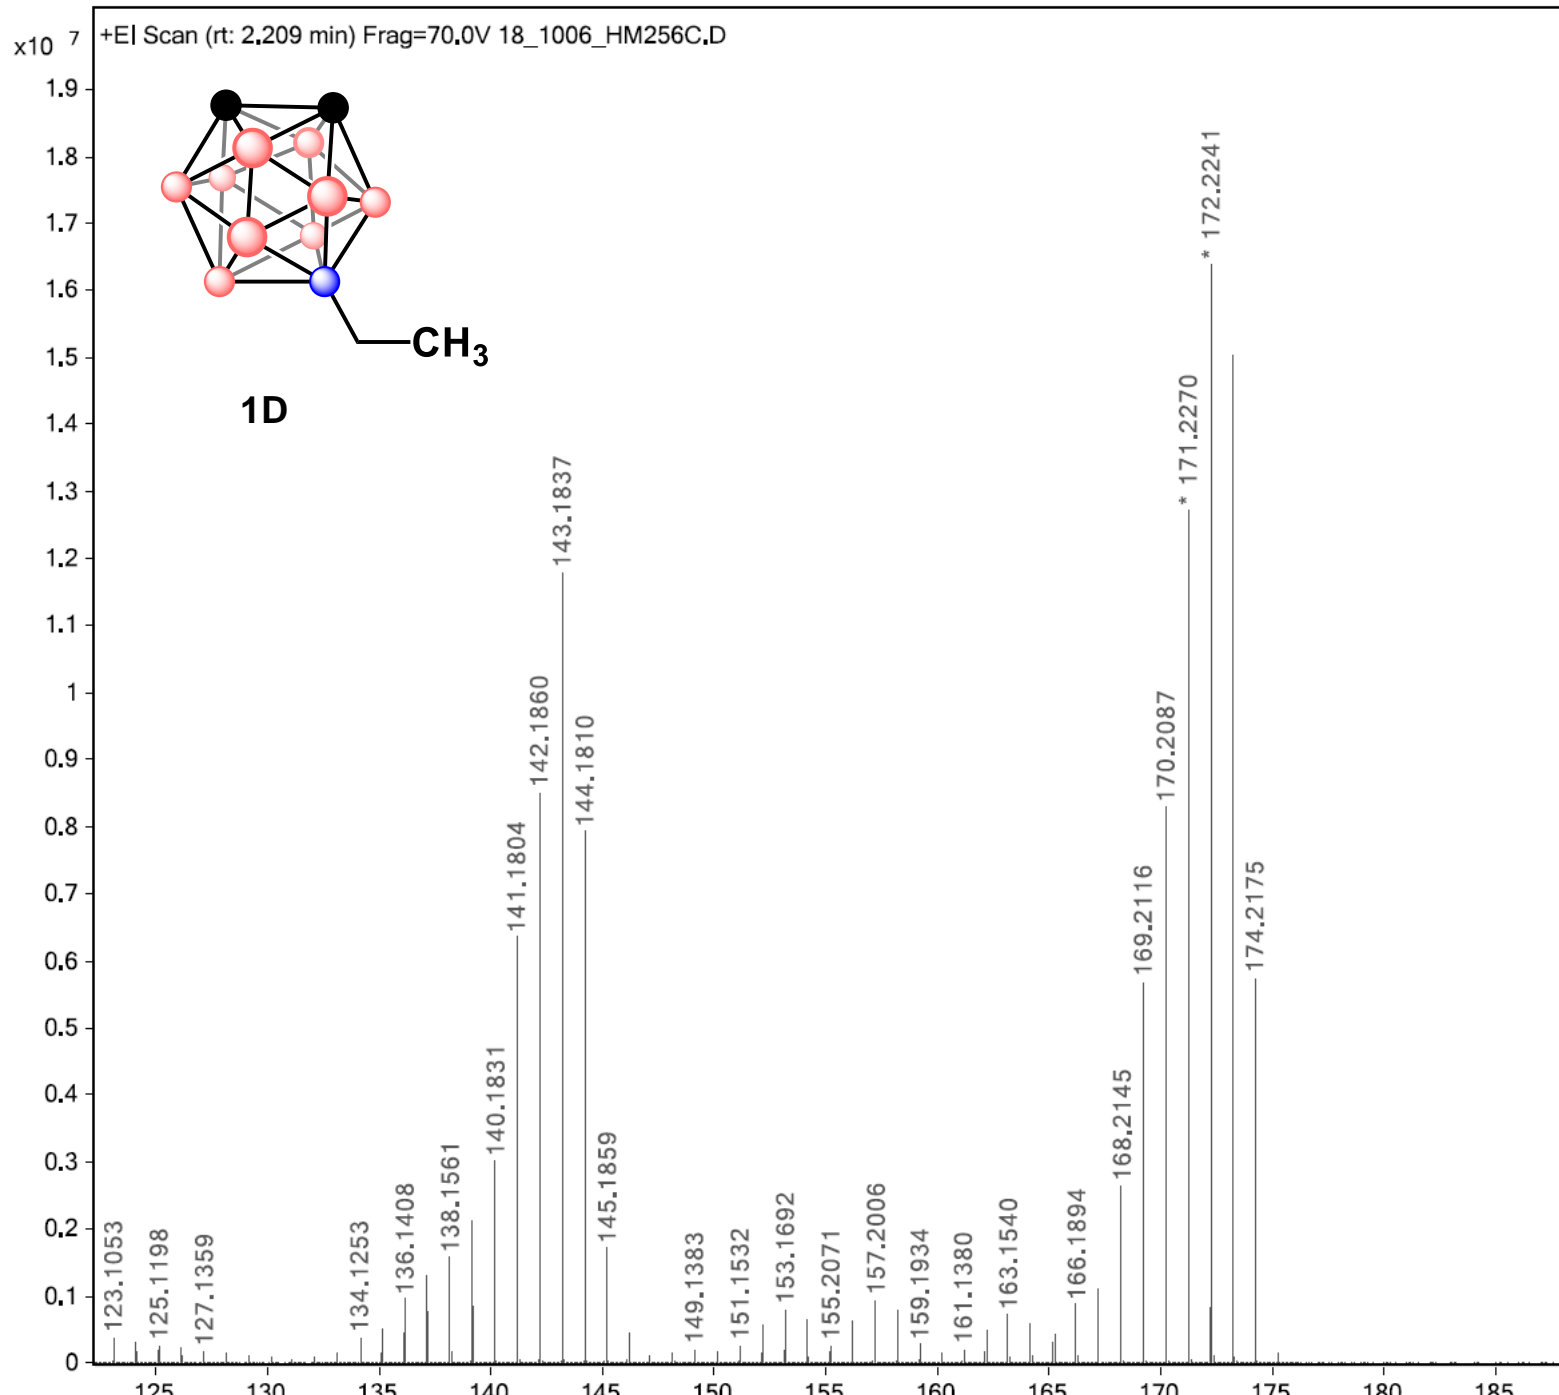

Oct05-2018-spokoyny  
Account No. AAS146  
1H HM256A

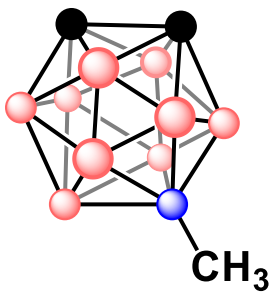

1E

3.49  
3.37

0.24

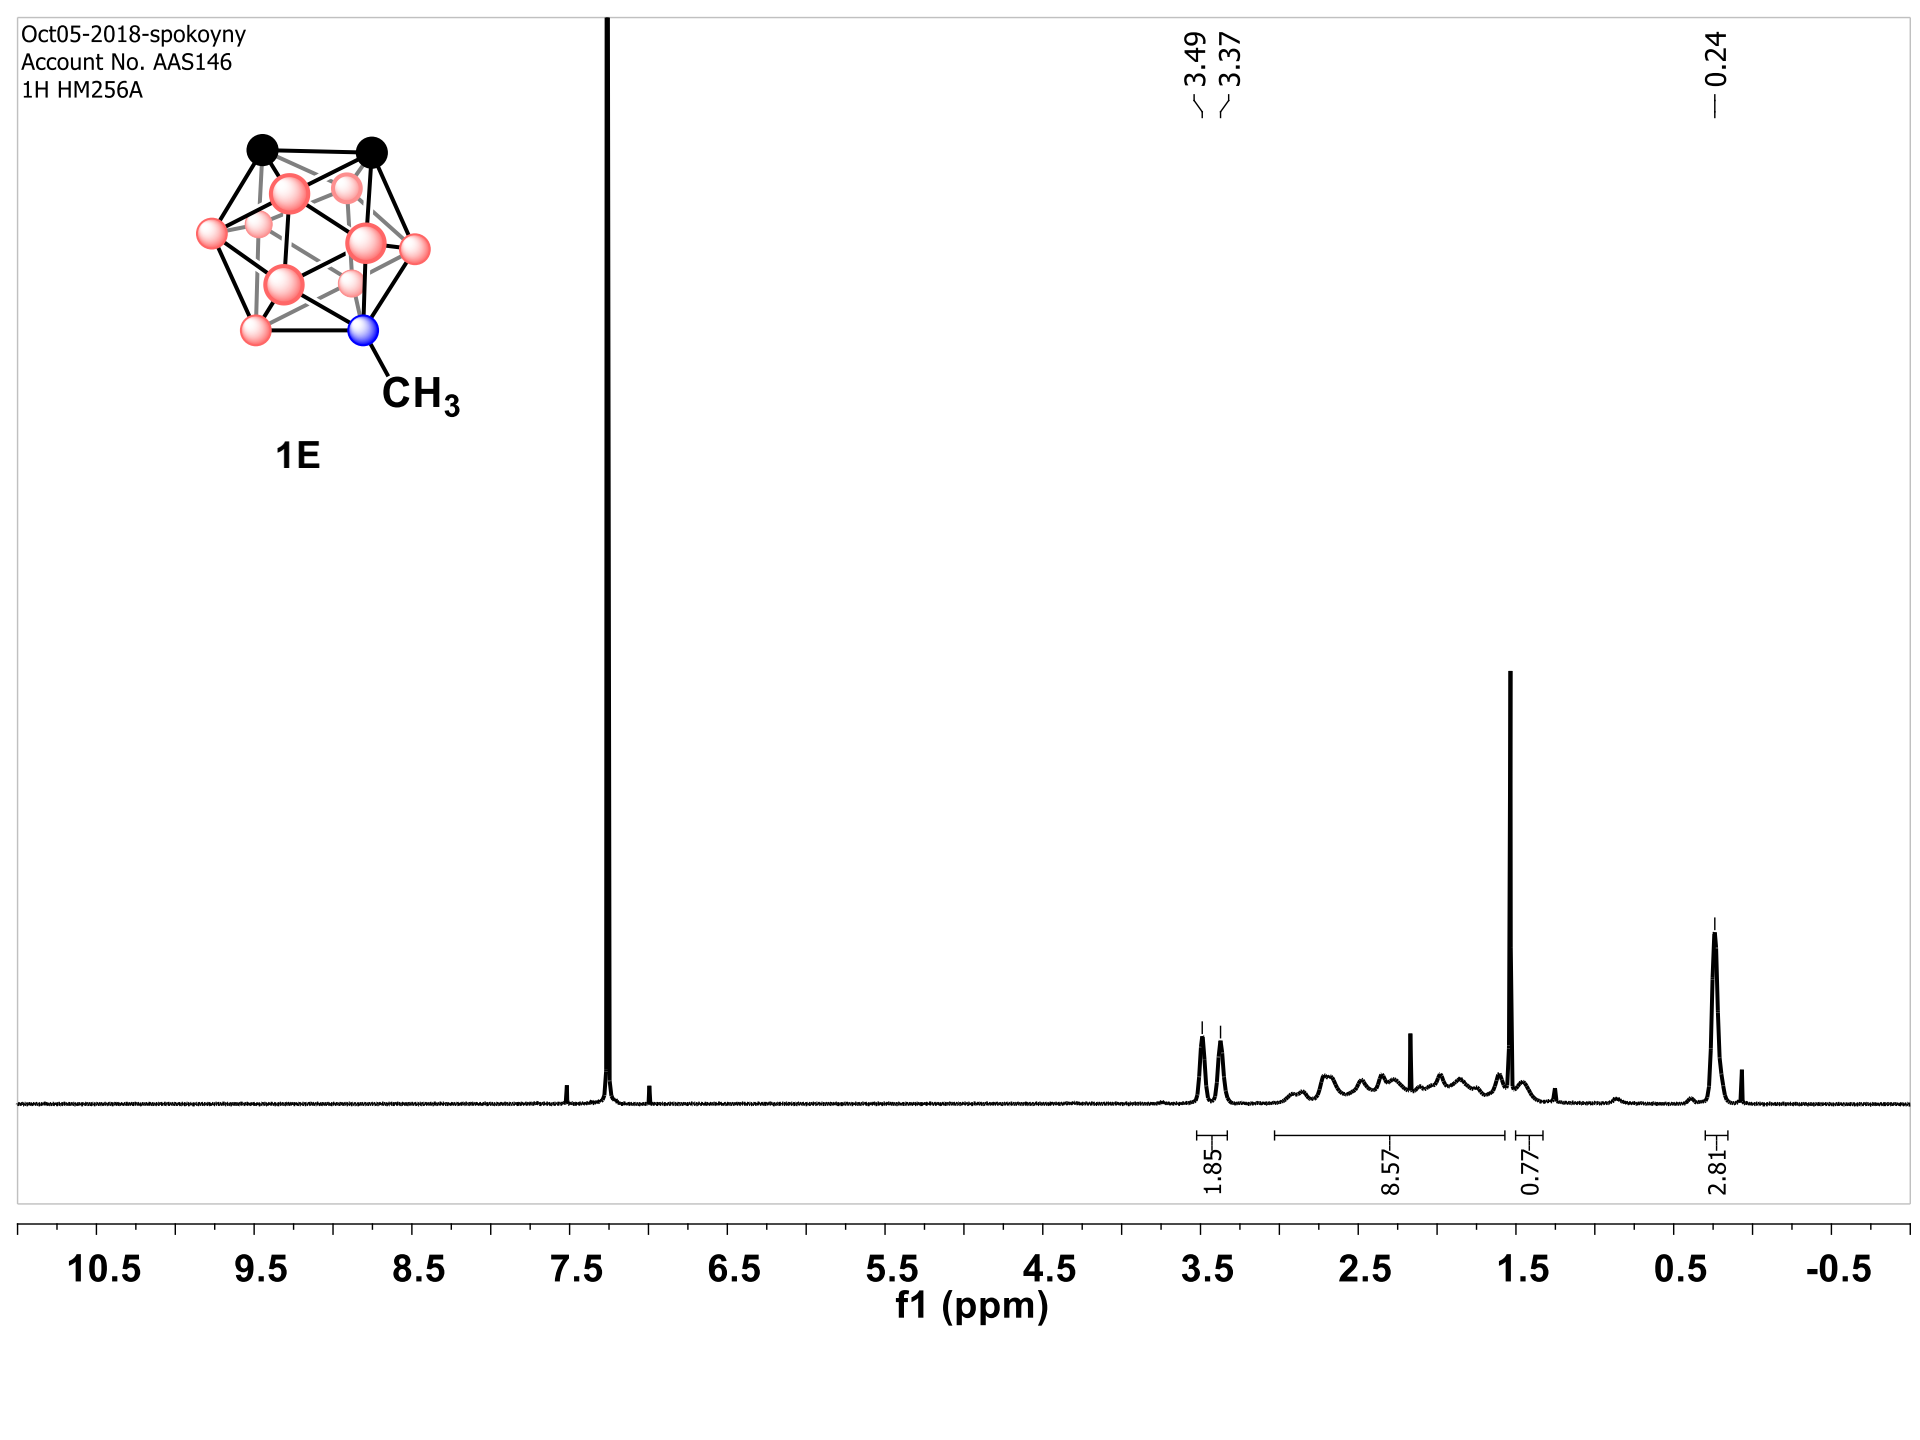

10.5

9.5

8.5

7.5

6.5

5.5

4.5

3.5

2.5

1.5

0.5

-0.5

f1 (ppm)

1.85

8.57

0.77

2.81



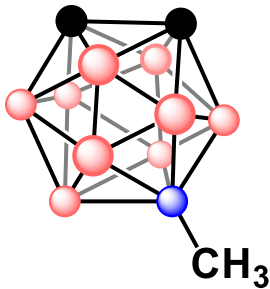

-7.25  
-1.23  
-2.36  
-8.02  
-9.17  
-12.98  
-14.12  
-15.16  
-16.44

1.21  
1.30  
2.31  
5.18

25 20 15 10 5 0 -5 -10 -15 -20 -25 -30 -35 -40 -45 -50  
f1 (ppm)

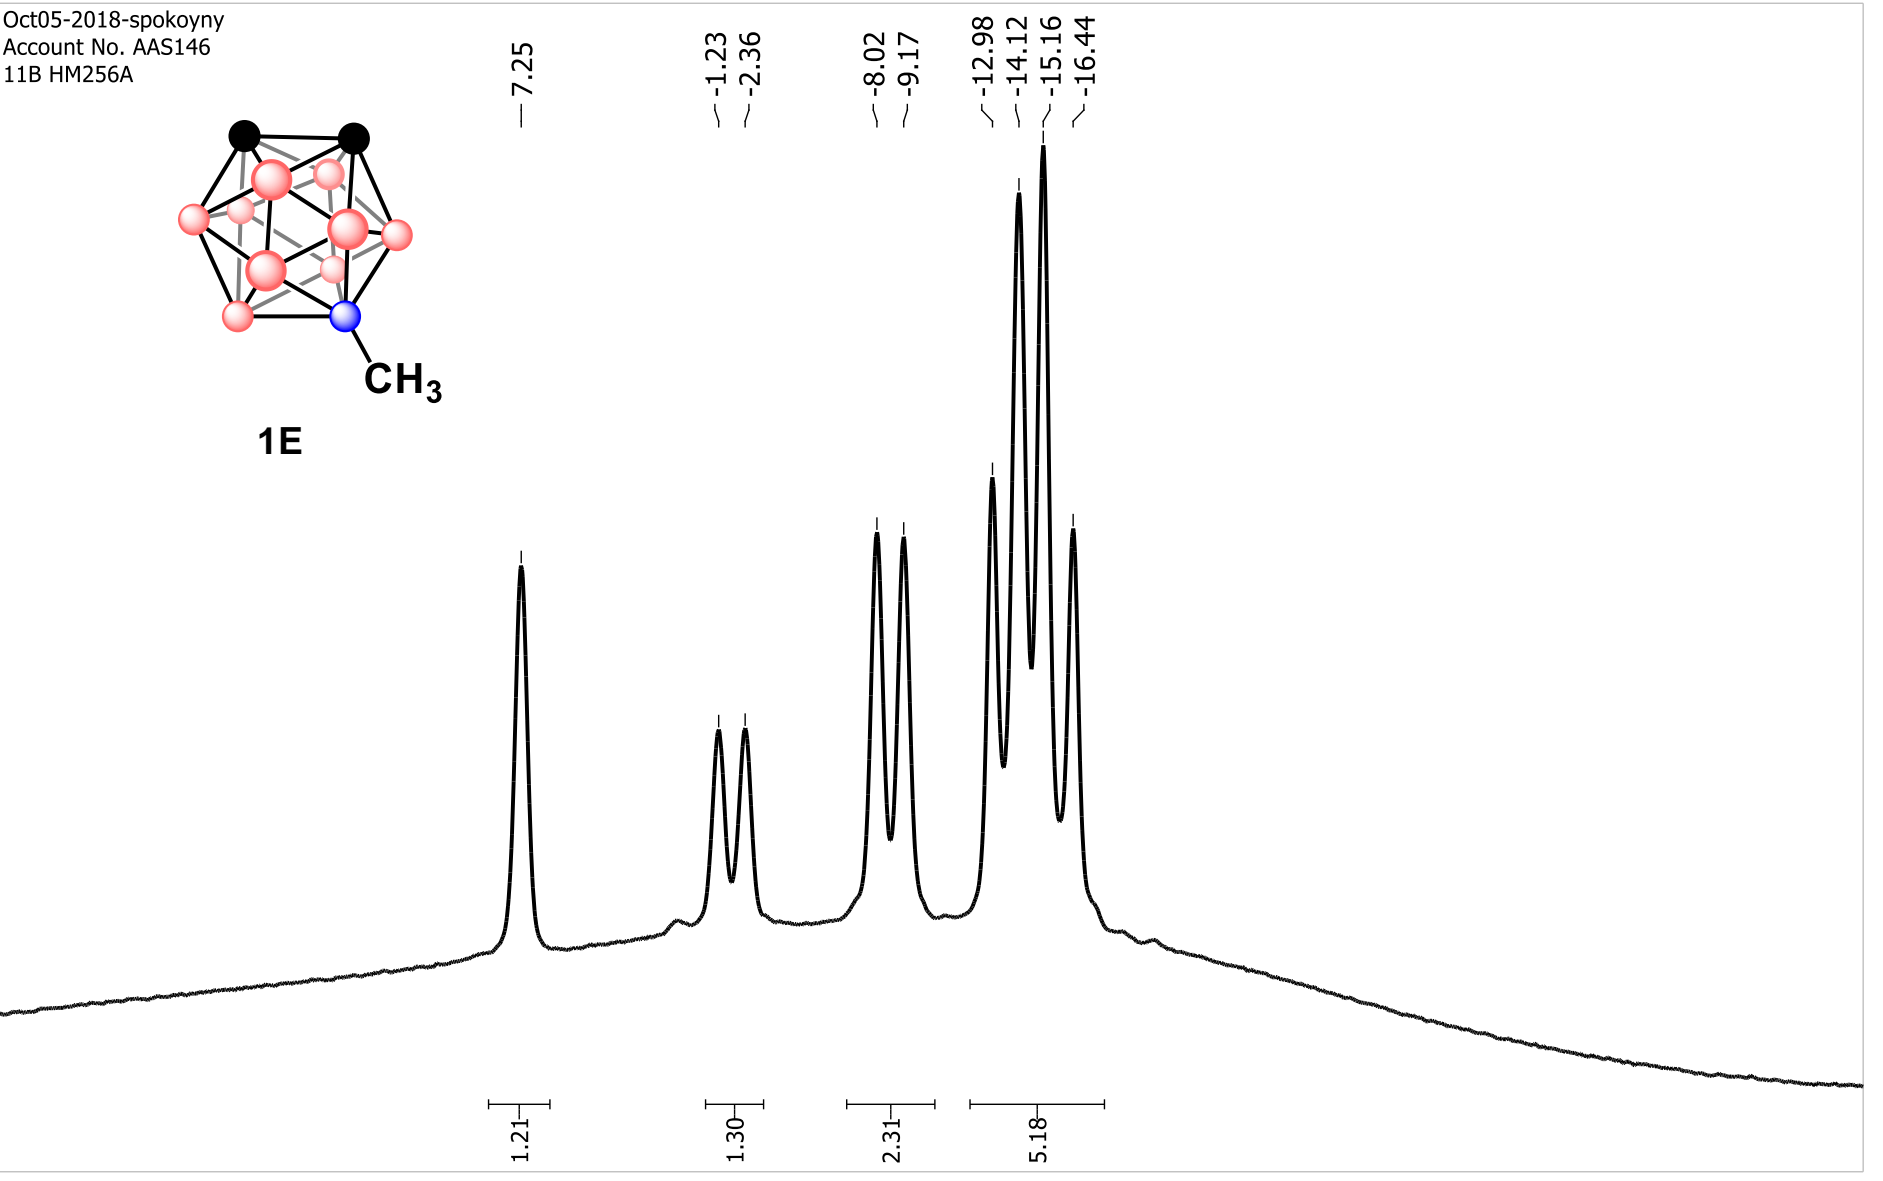

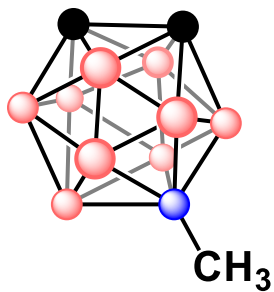

**1E**

— 7.25

— -1.78

— -8.57

∧ -13.59

∧ -14.59

∧ -15.72

1.13

1.28

1.95

5.65

25 20 15 10 5 0 -5 -10 -15 -20 -25 -30 -35 -40 -45 -50  
f1 (ppm)

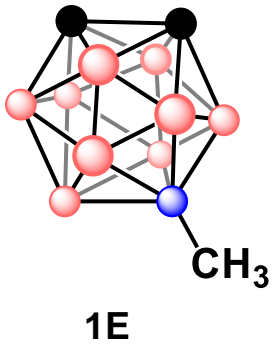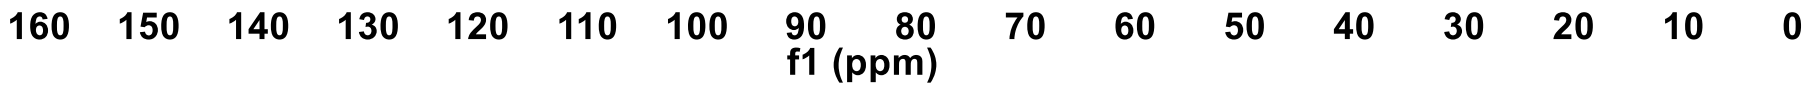

— 53.45  
— 47.21

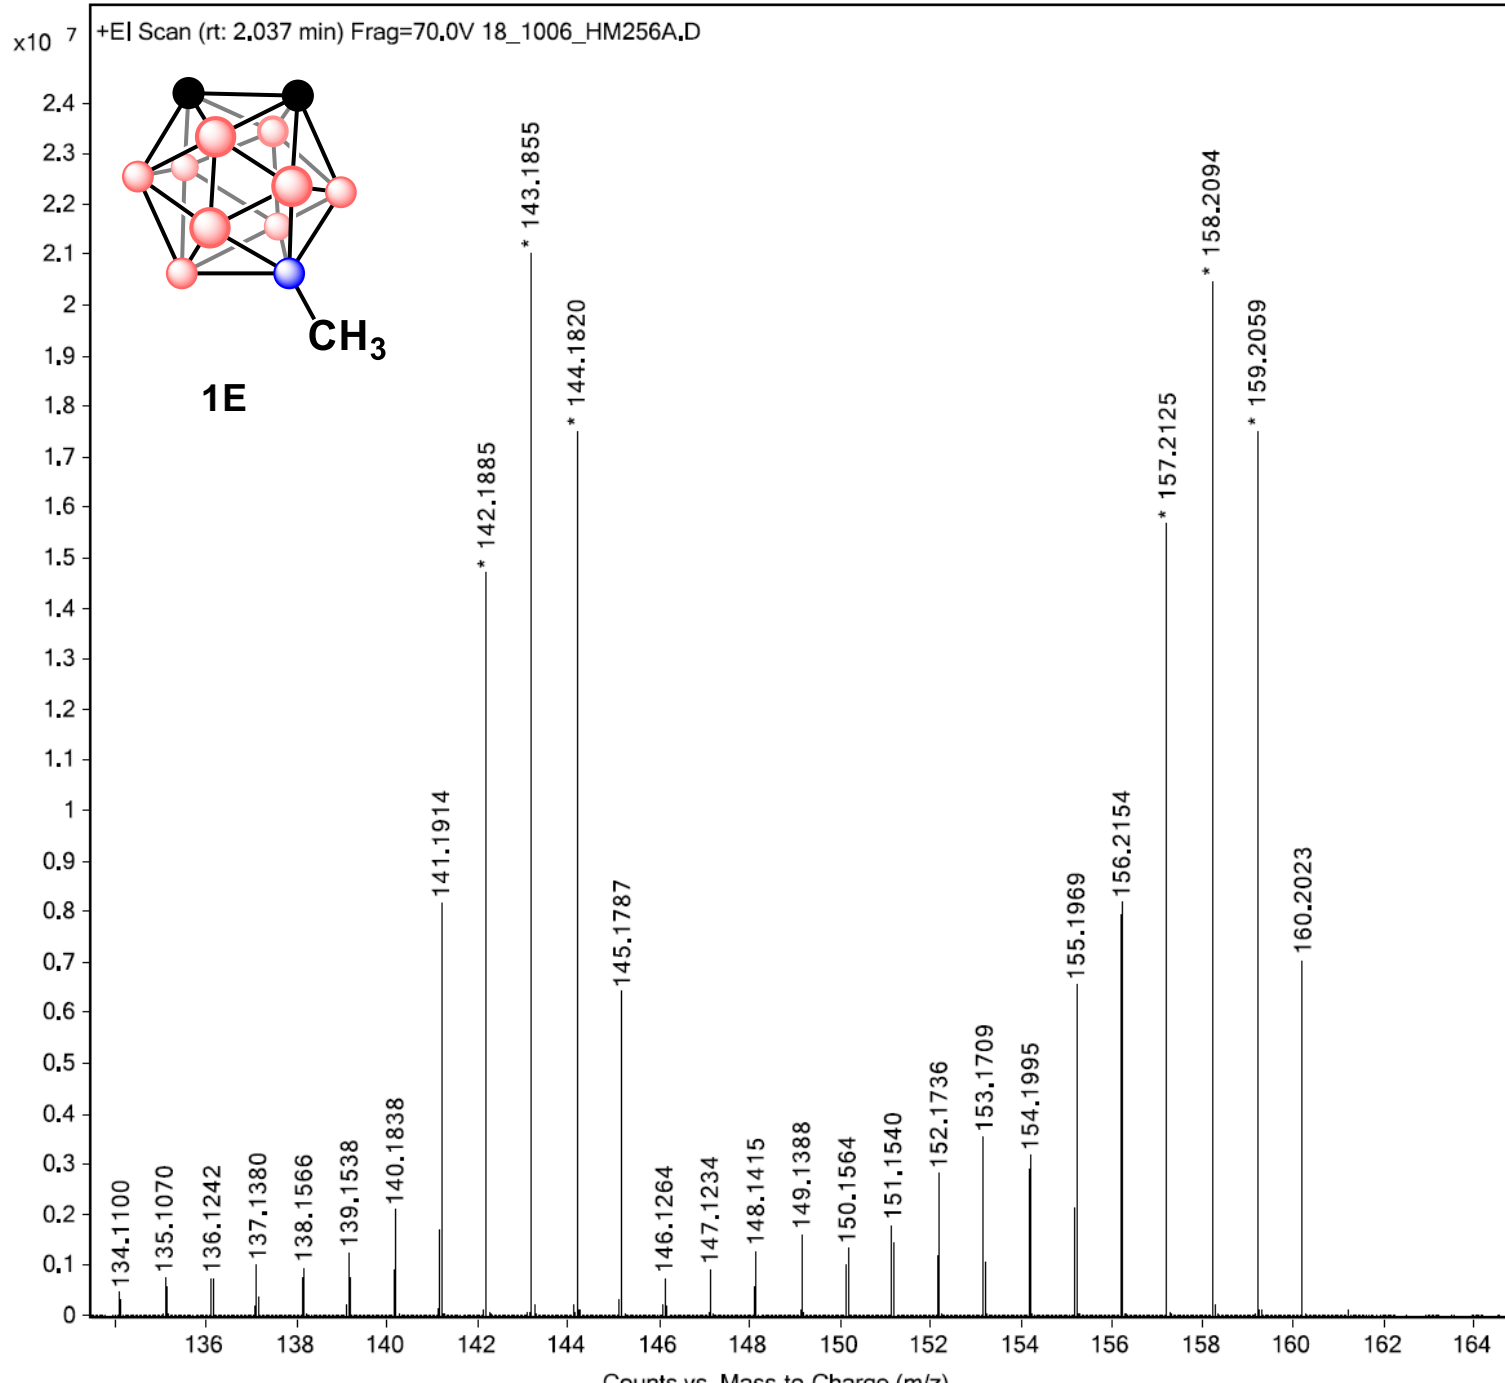

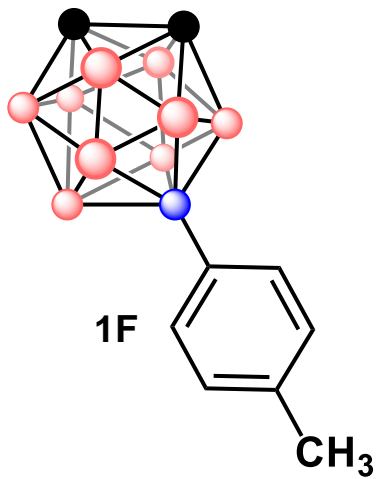

7.29  
7.27  
7.07  
7.05

3.58  
3.48

2.30

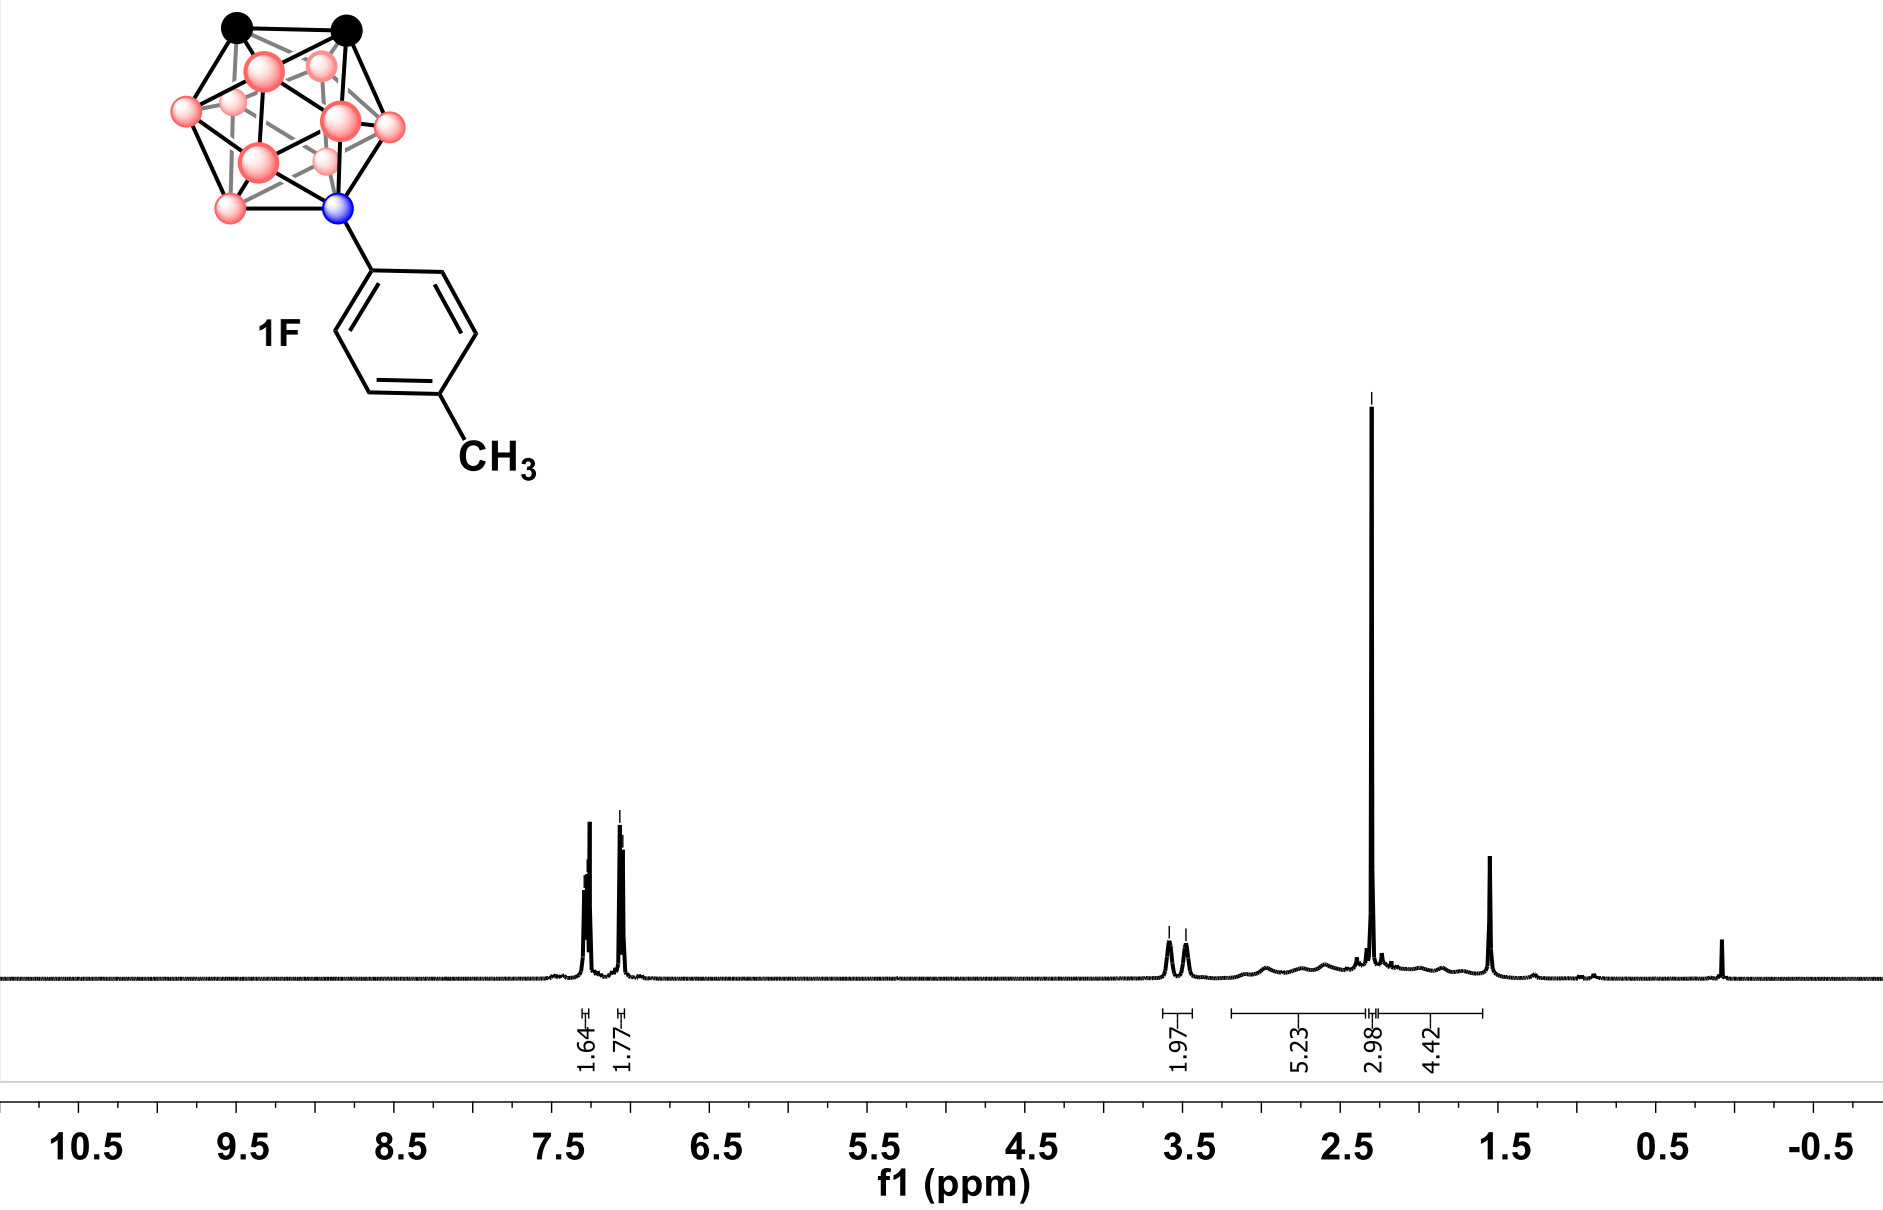

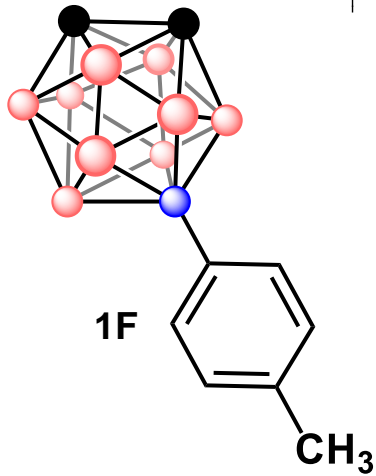

— 7.50  
~ -1.85  
~ -3.00  
~ -8.38  
~ -9.55  
~ -13.47  
~ -13.99  
~ -15.10  
~ -16.40

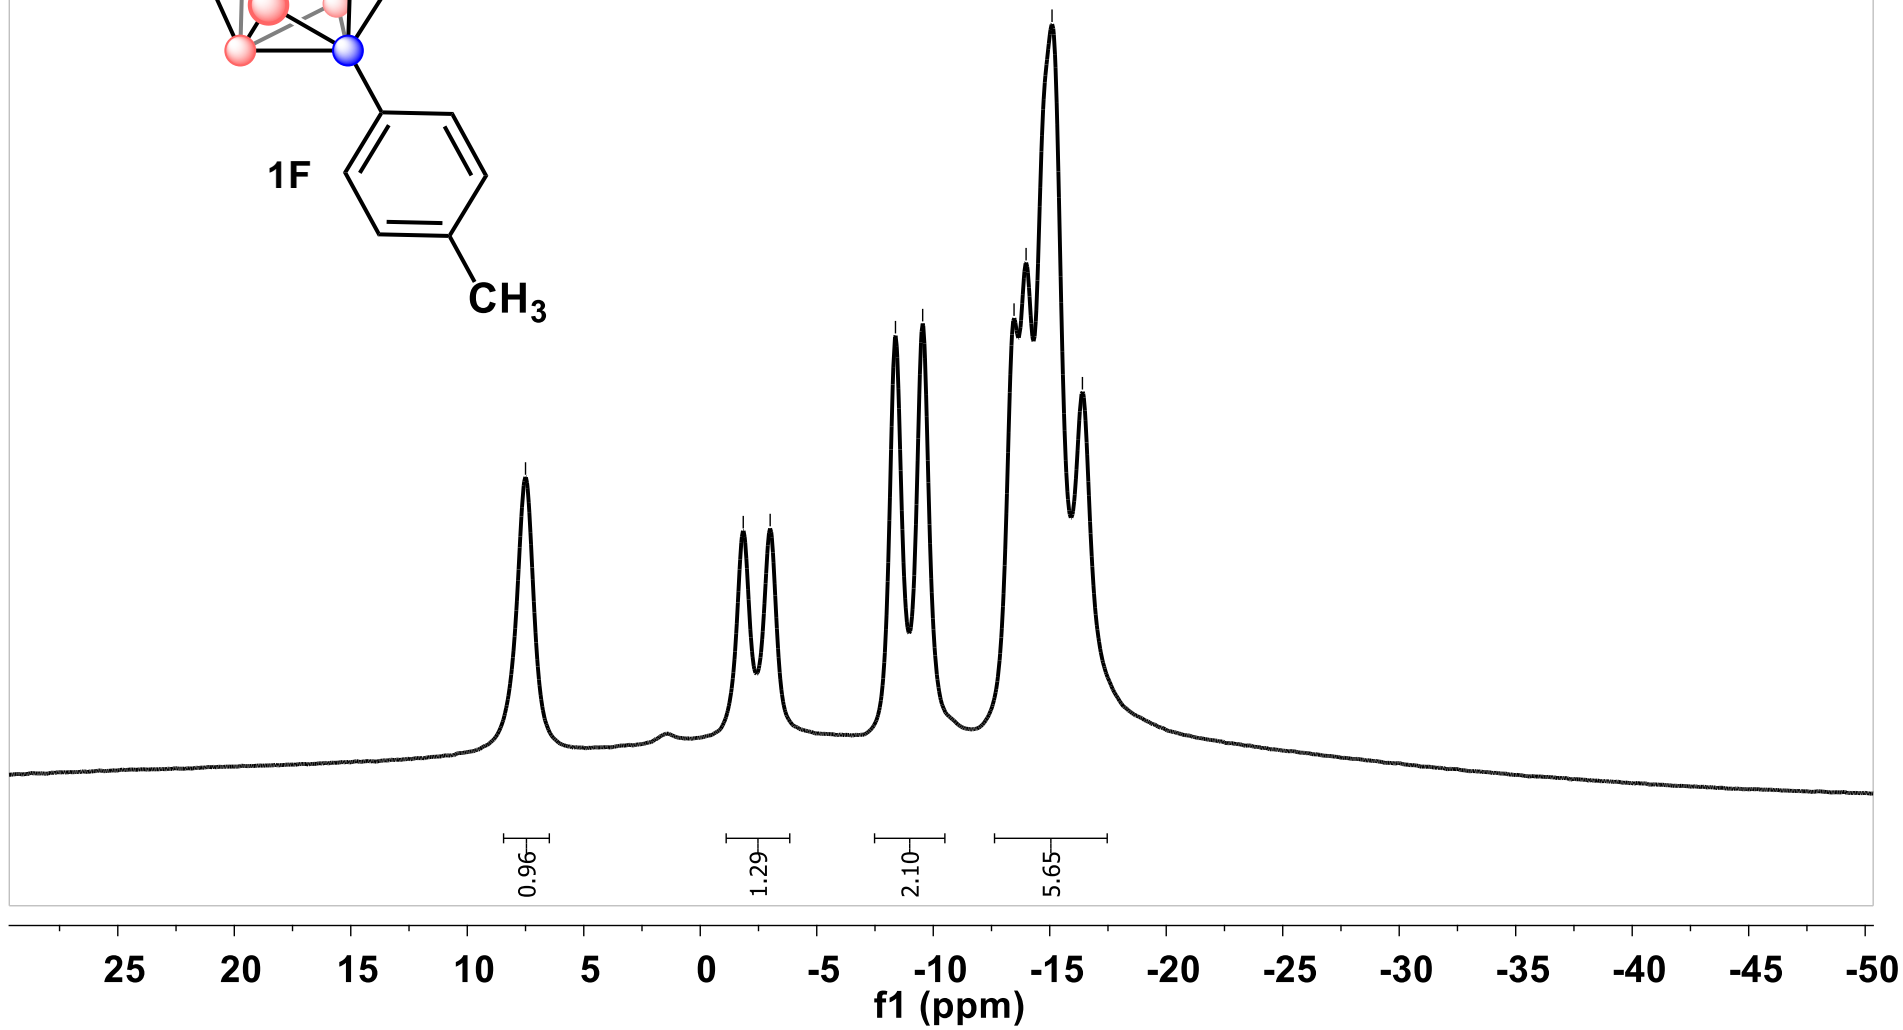

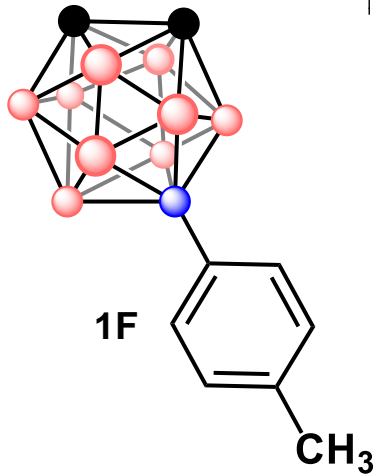

— 7.50  
— -2.41  
— -8.95  
∩ -14.08  
∩ -14.56  
∩ -15.68

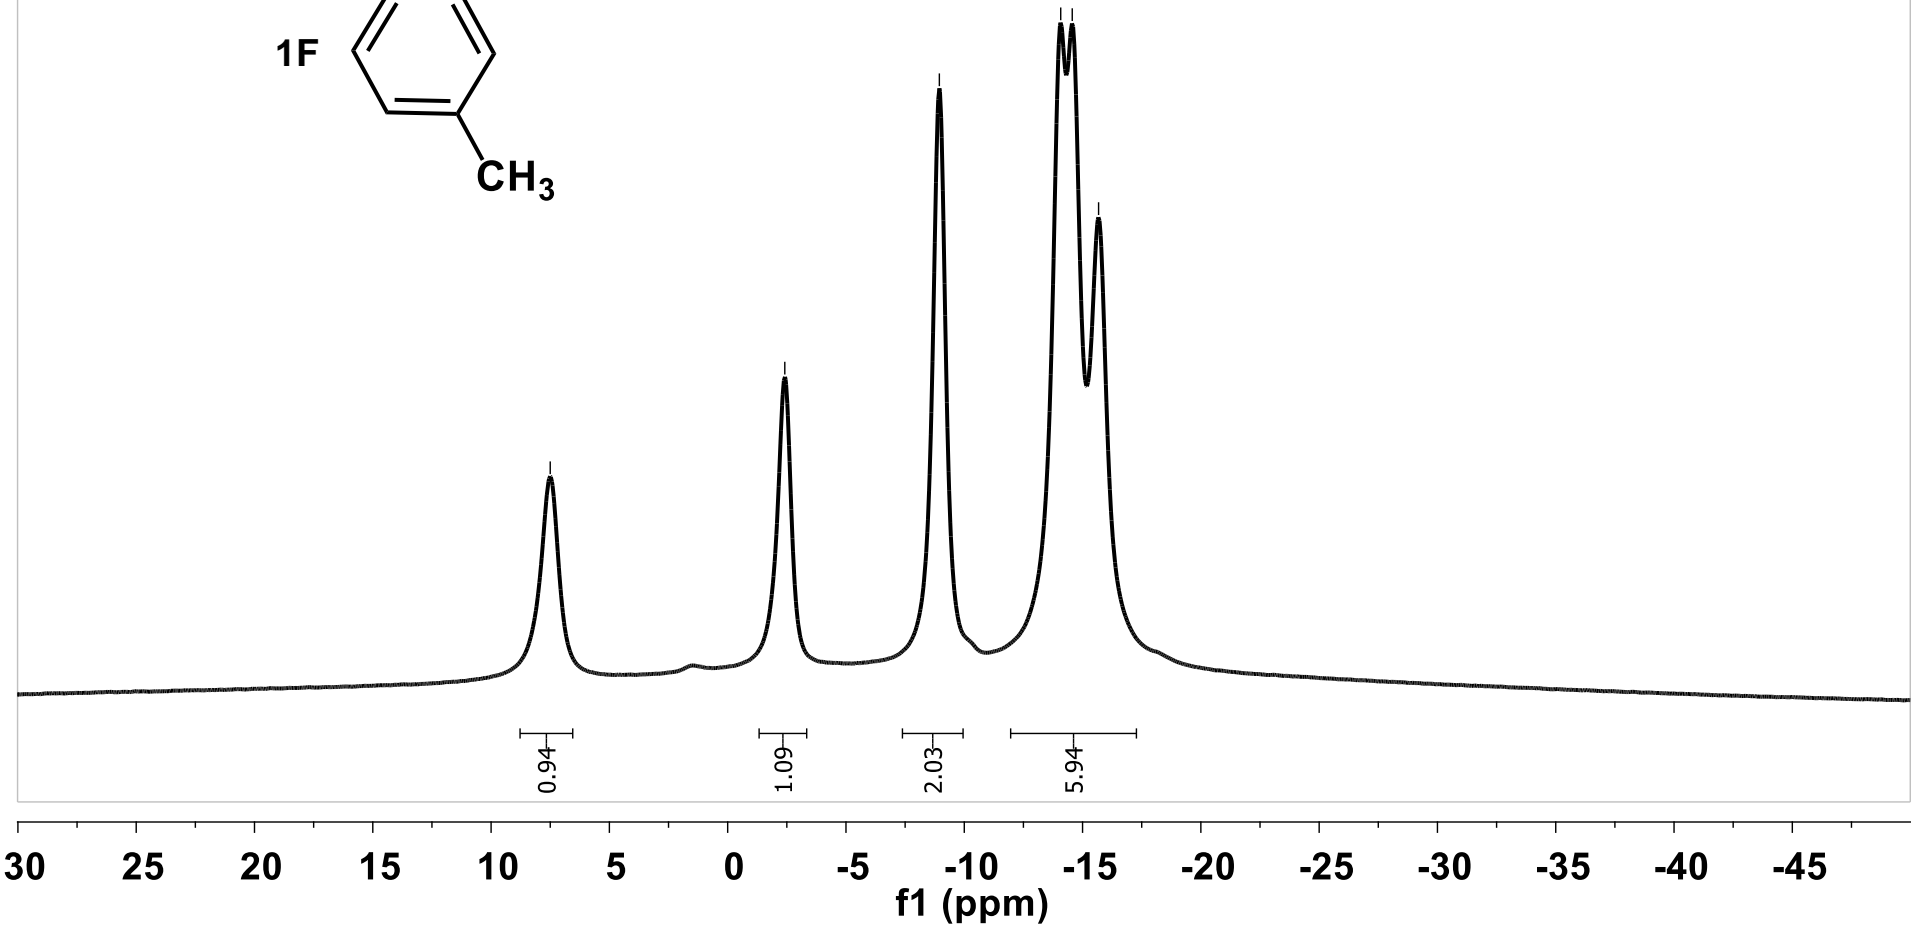

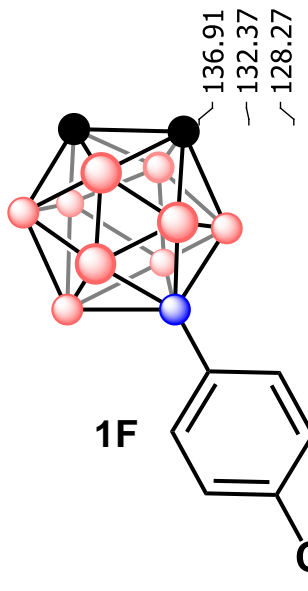

— 53.09  
— 48.64  
— 21.20





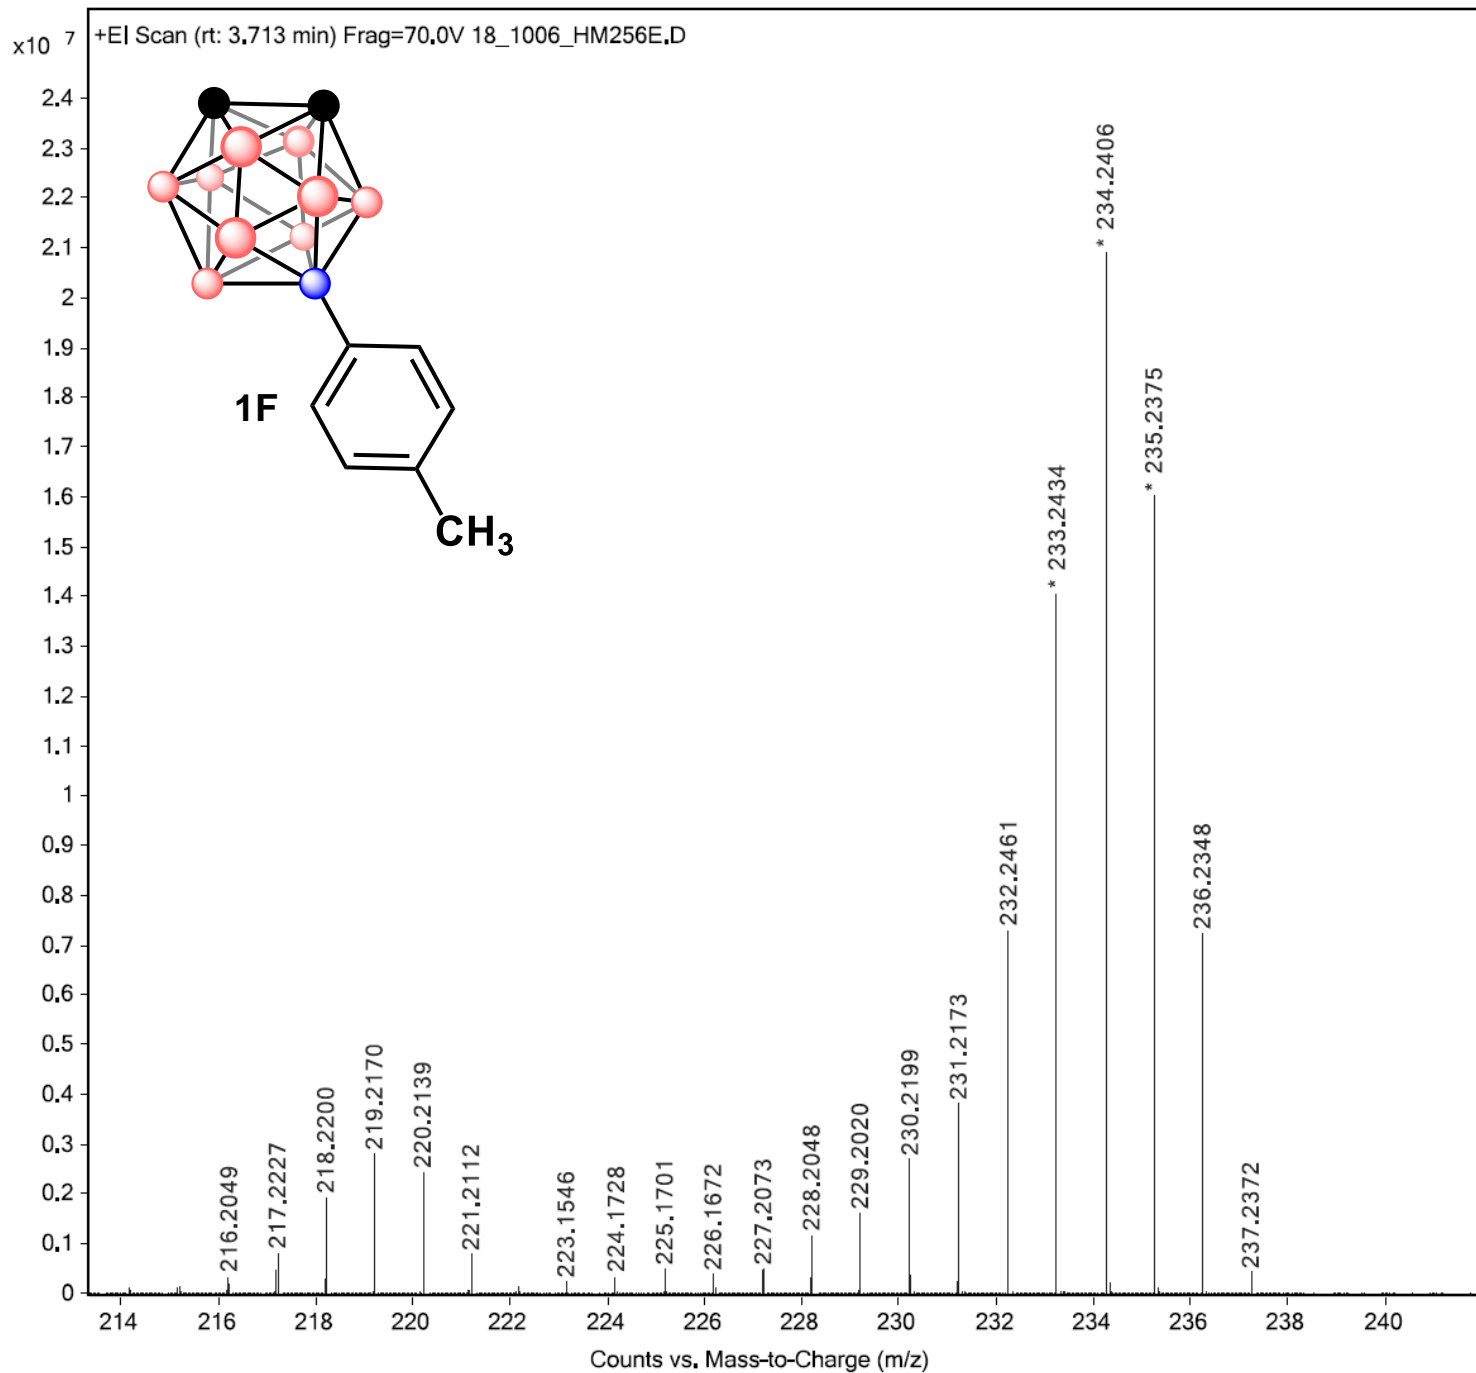

Sep30-2018-spokoyny  
Account No. AAS146  
1H HM256F

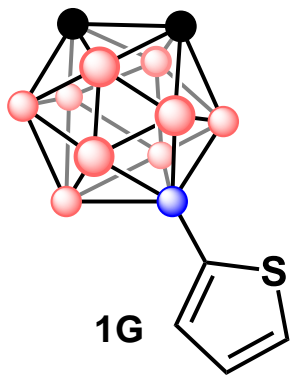

7.33  
7.33  
7.32  
7.32  
7.02  
7.01  
7.01  
7.00  
6.99

3.60  
3.49

0.89

1.86

2.04

7.10

2.10

10.5 9.5 8.5 7.5 6.5 5.5 4.5 3.5 2.5 1.5 0.5 -0.5  
f1 (ppm)



4.49  
-1.64  
-2.80  
-8.24  
-9.41  
-13.33  
-14.06  
-14.67  
-15.18  
-16.45

0.99  
1.17  
2.01  
5.83

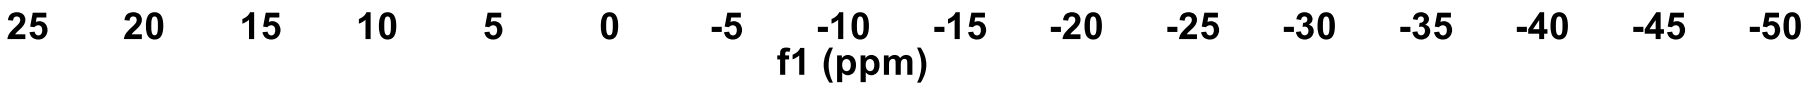

Oct10-2018-spokoyny  
Account No. AAS146  
11B(1H) HM256F

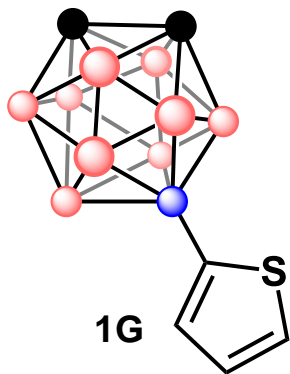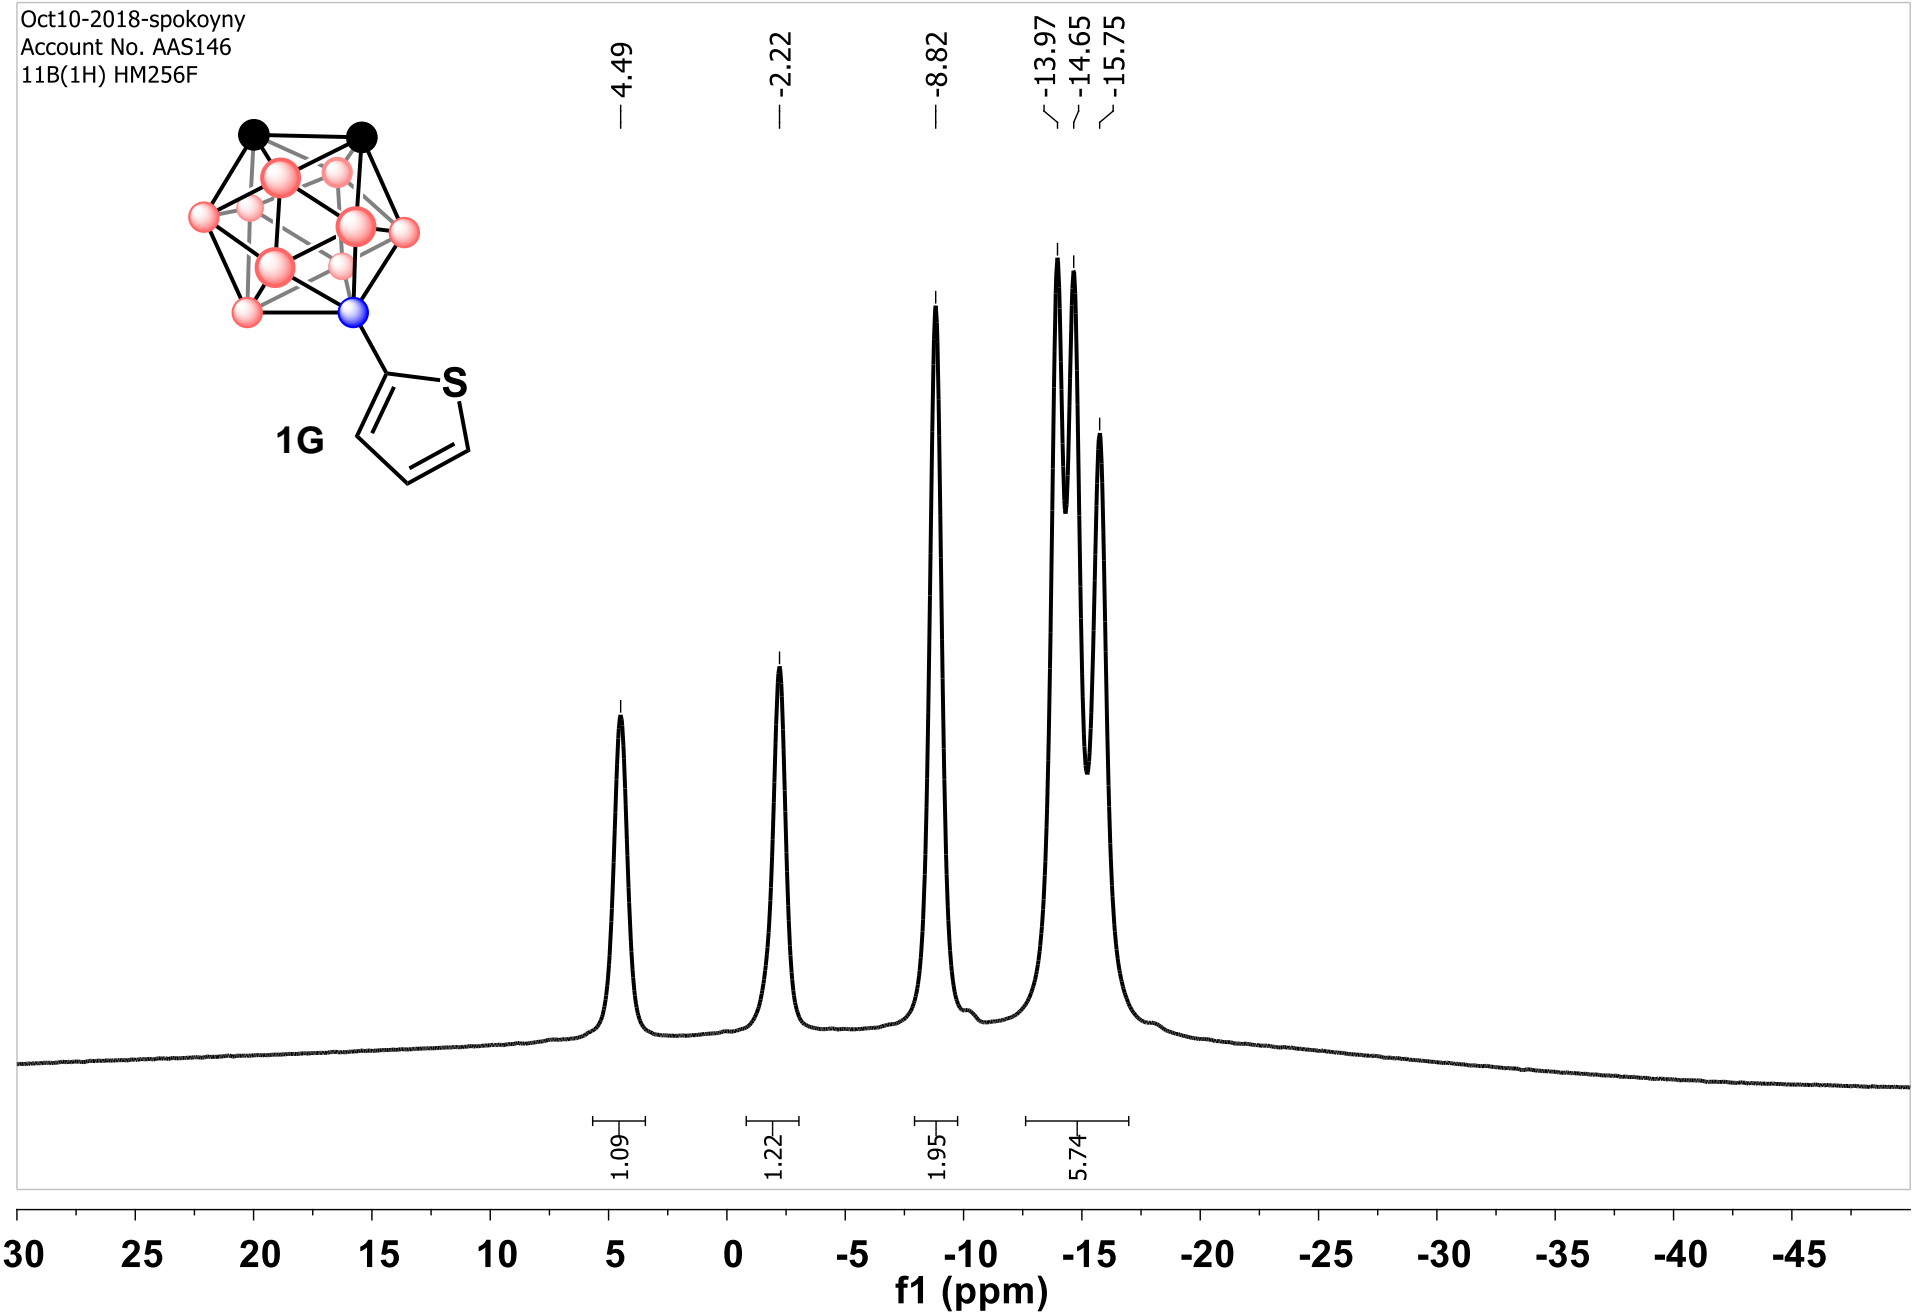

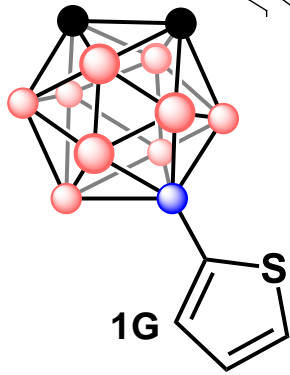

130.75  
127.91  
127.80

53.00  
48.87



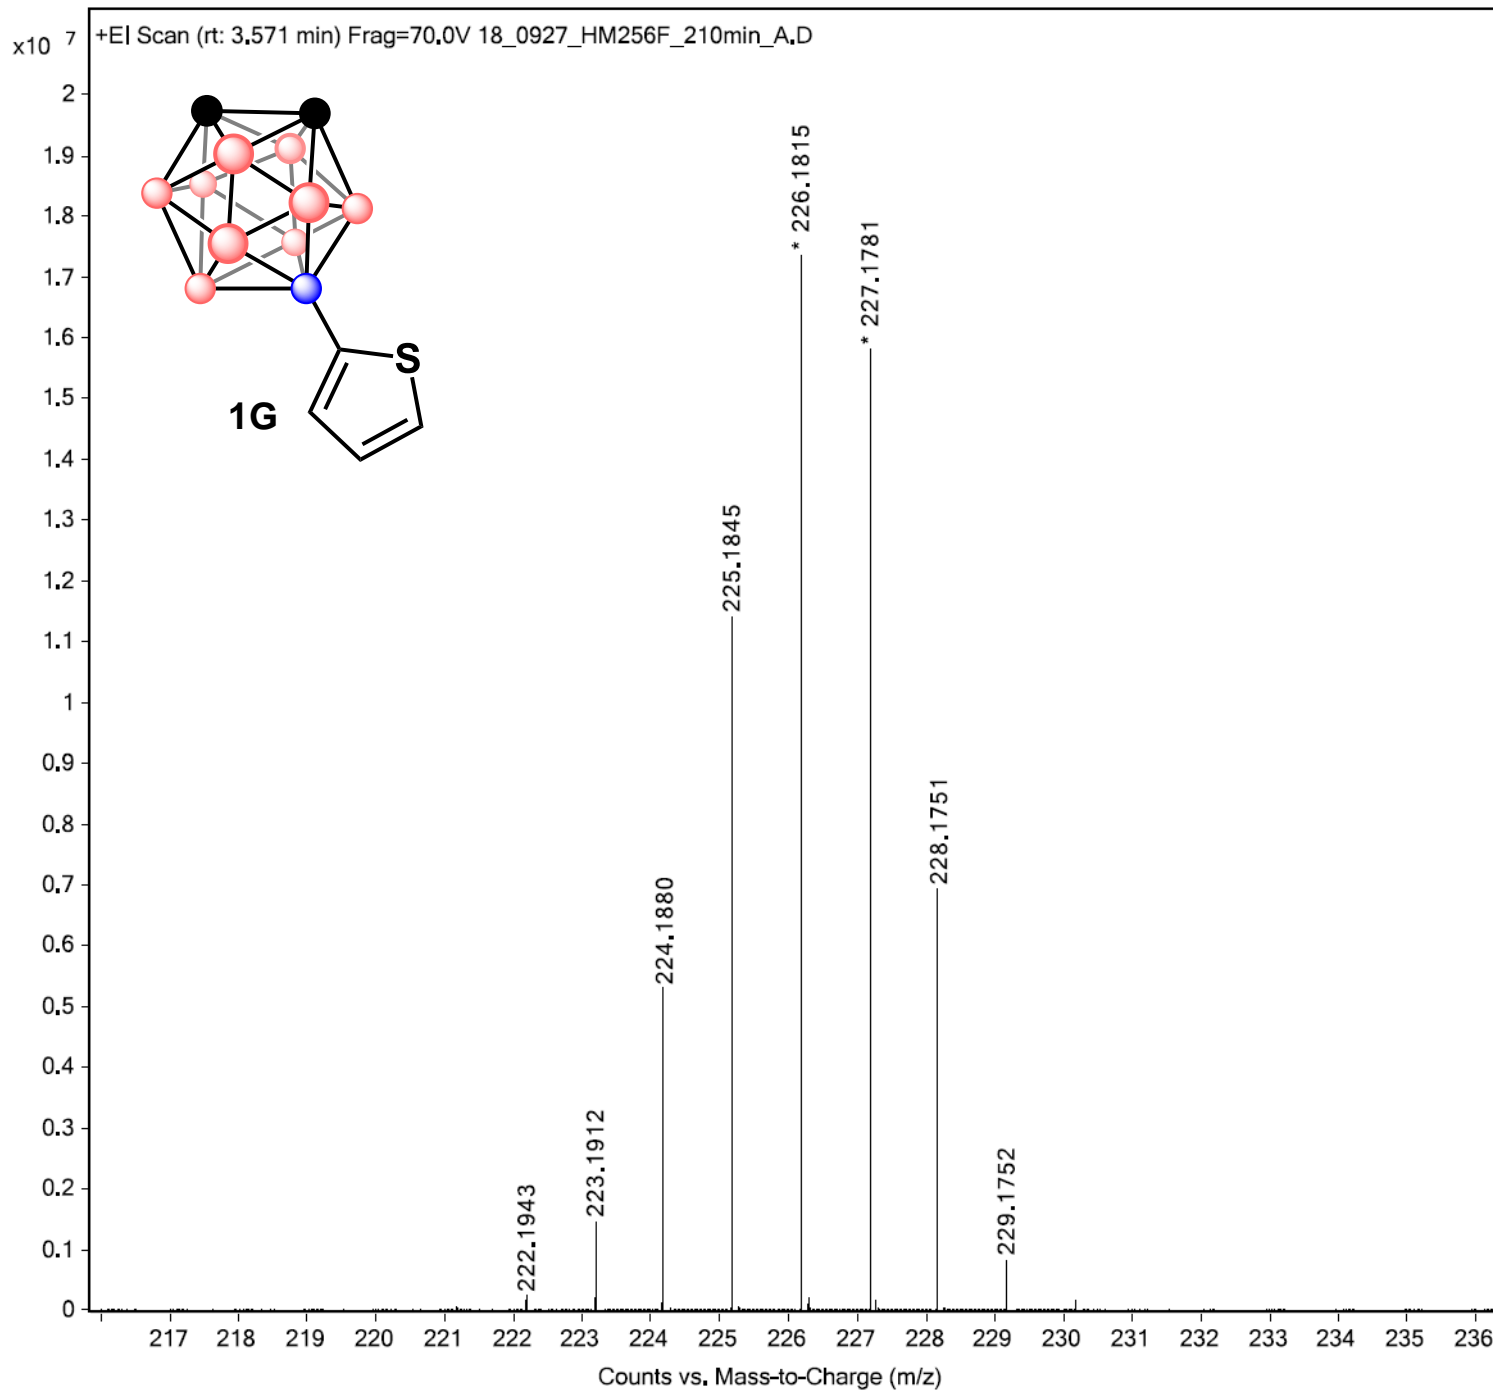

Oct05-2018-spokoyny  
Account No. AAS146  
1H HM256H

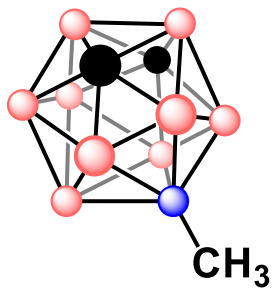

1H

— 2.86

— 0.36

0.63

2.42

8.03

2.92

10.5 9.5 8.5 7.5 6.5 5.5 4.5 3.5 2.5 1.5 0.5 -0.5  
f1 (ppm)

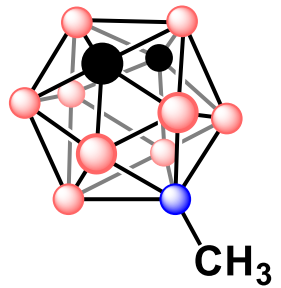

- -0.69
- ~ -5.73
- ~ -6.99
- ~ -9.14
- ~ -10.30
- ~ -12.48
- ~ -13.72
- ~ -14.97
- ~ -17.29
- ~ -18.69
- ~ -20.55
- ~ -21.95

- 1.05
- 2.00
- 1.25
- 3.29
- 1.26
- 1.15

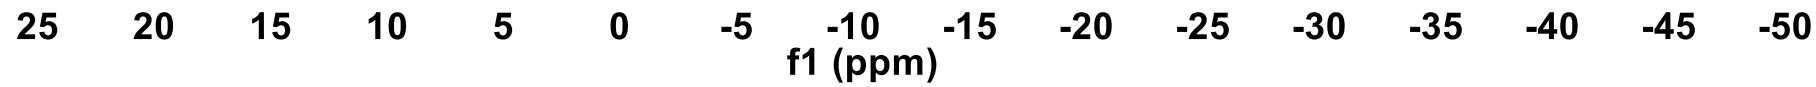



Oct10-2018-spokoyny  
Account No. AAS146  
11B(1H) HM256H

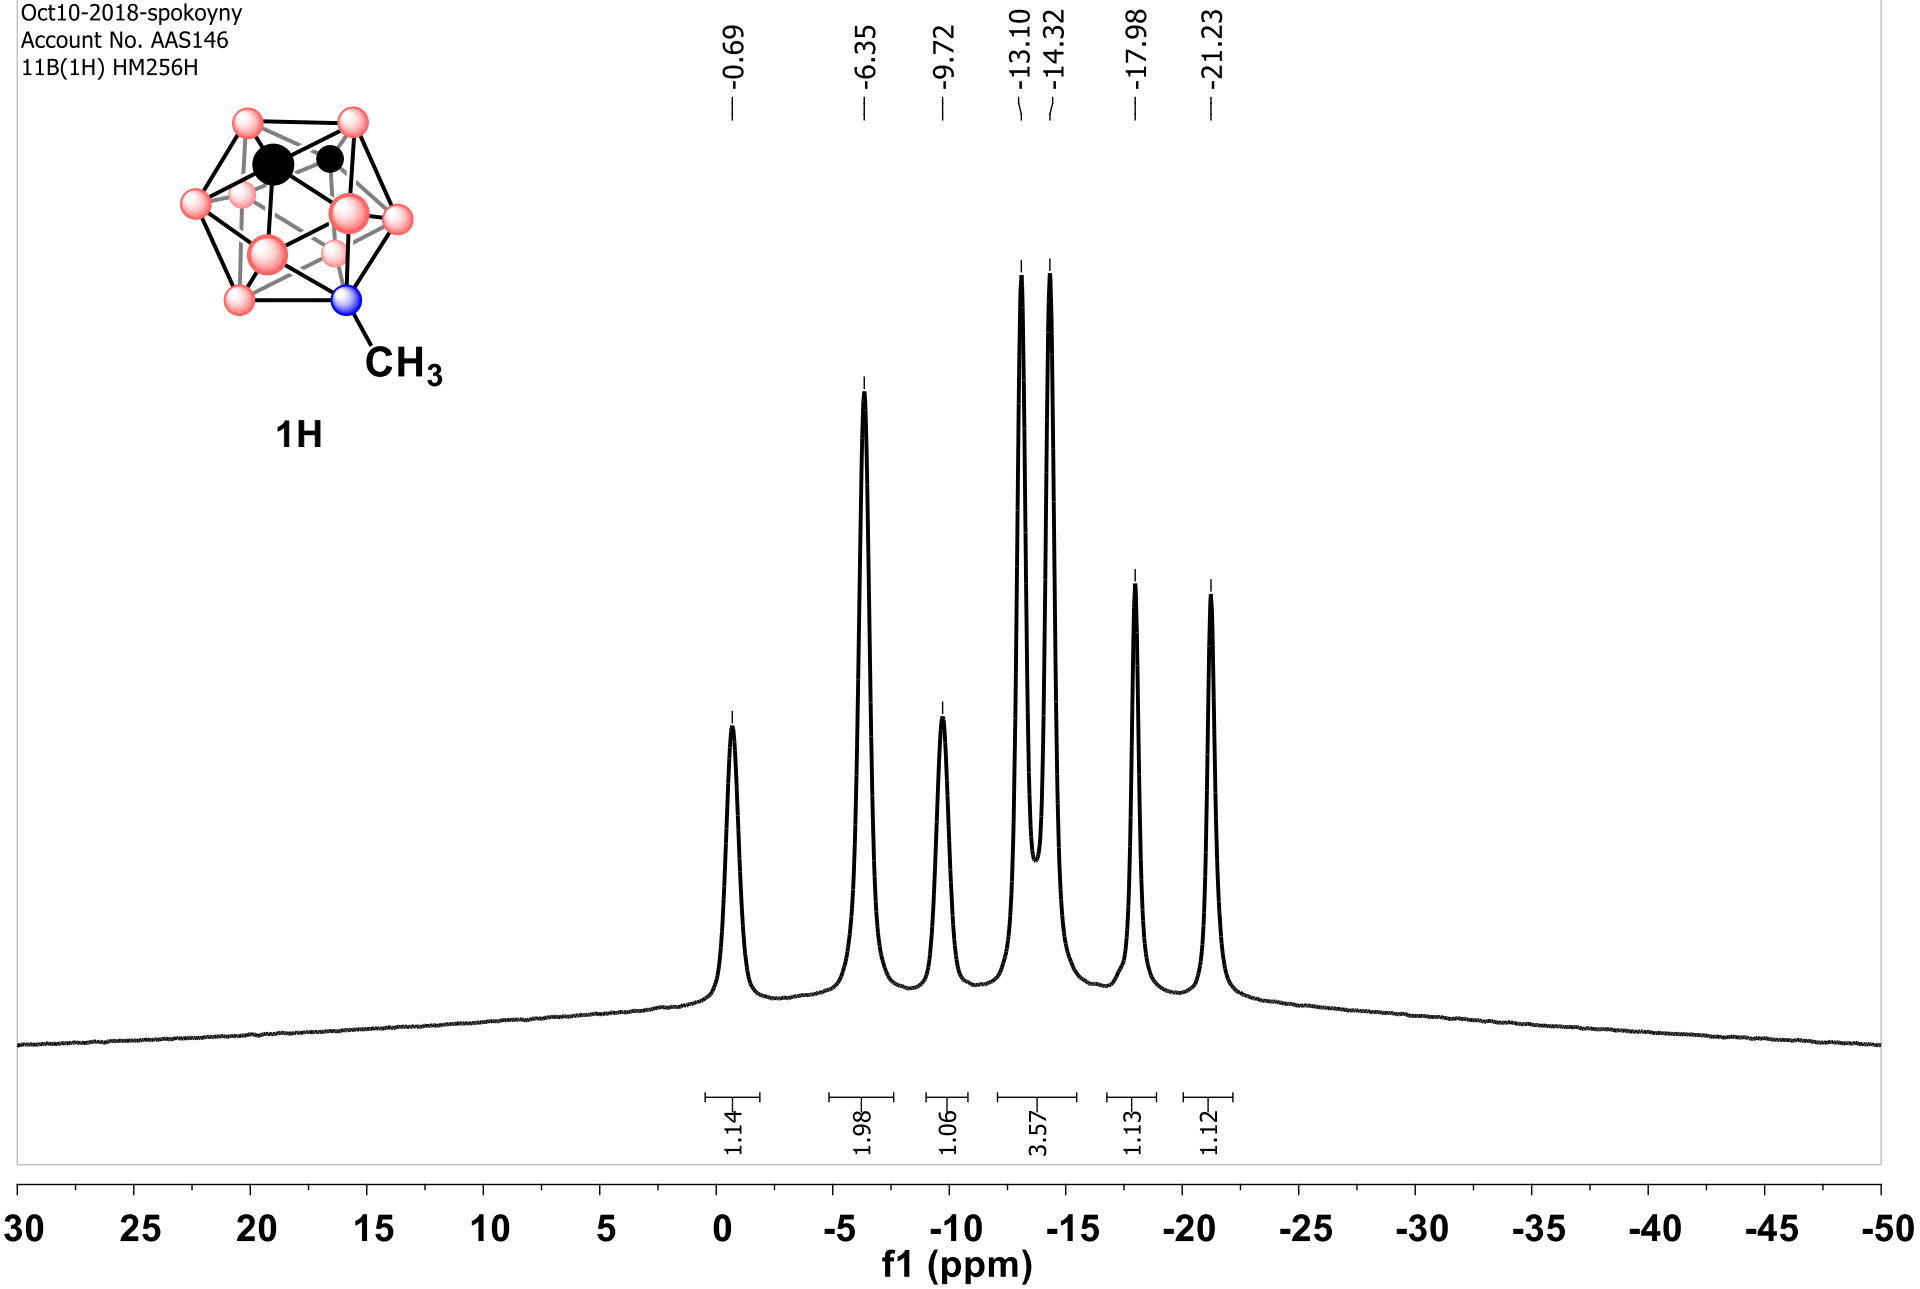



— 54.34

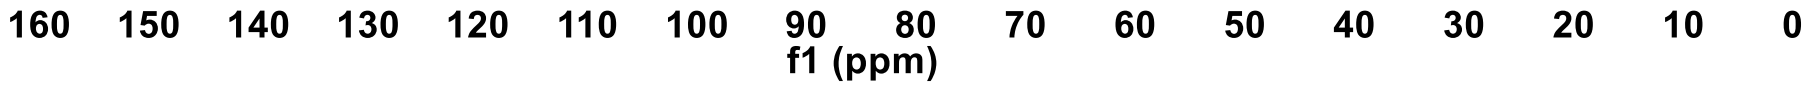

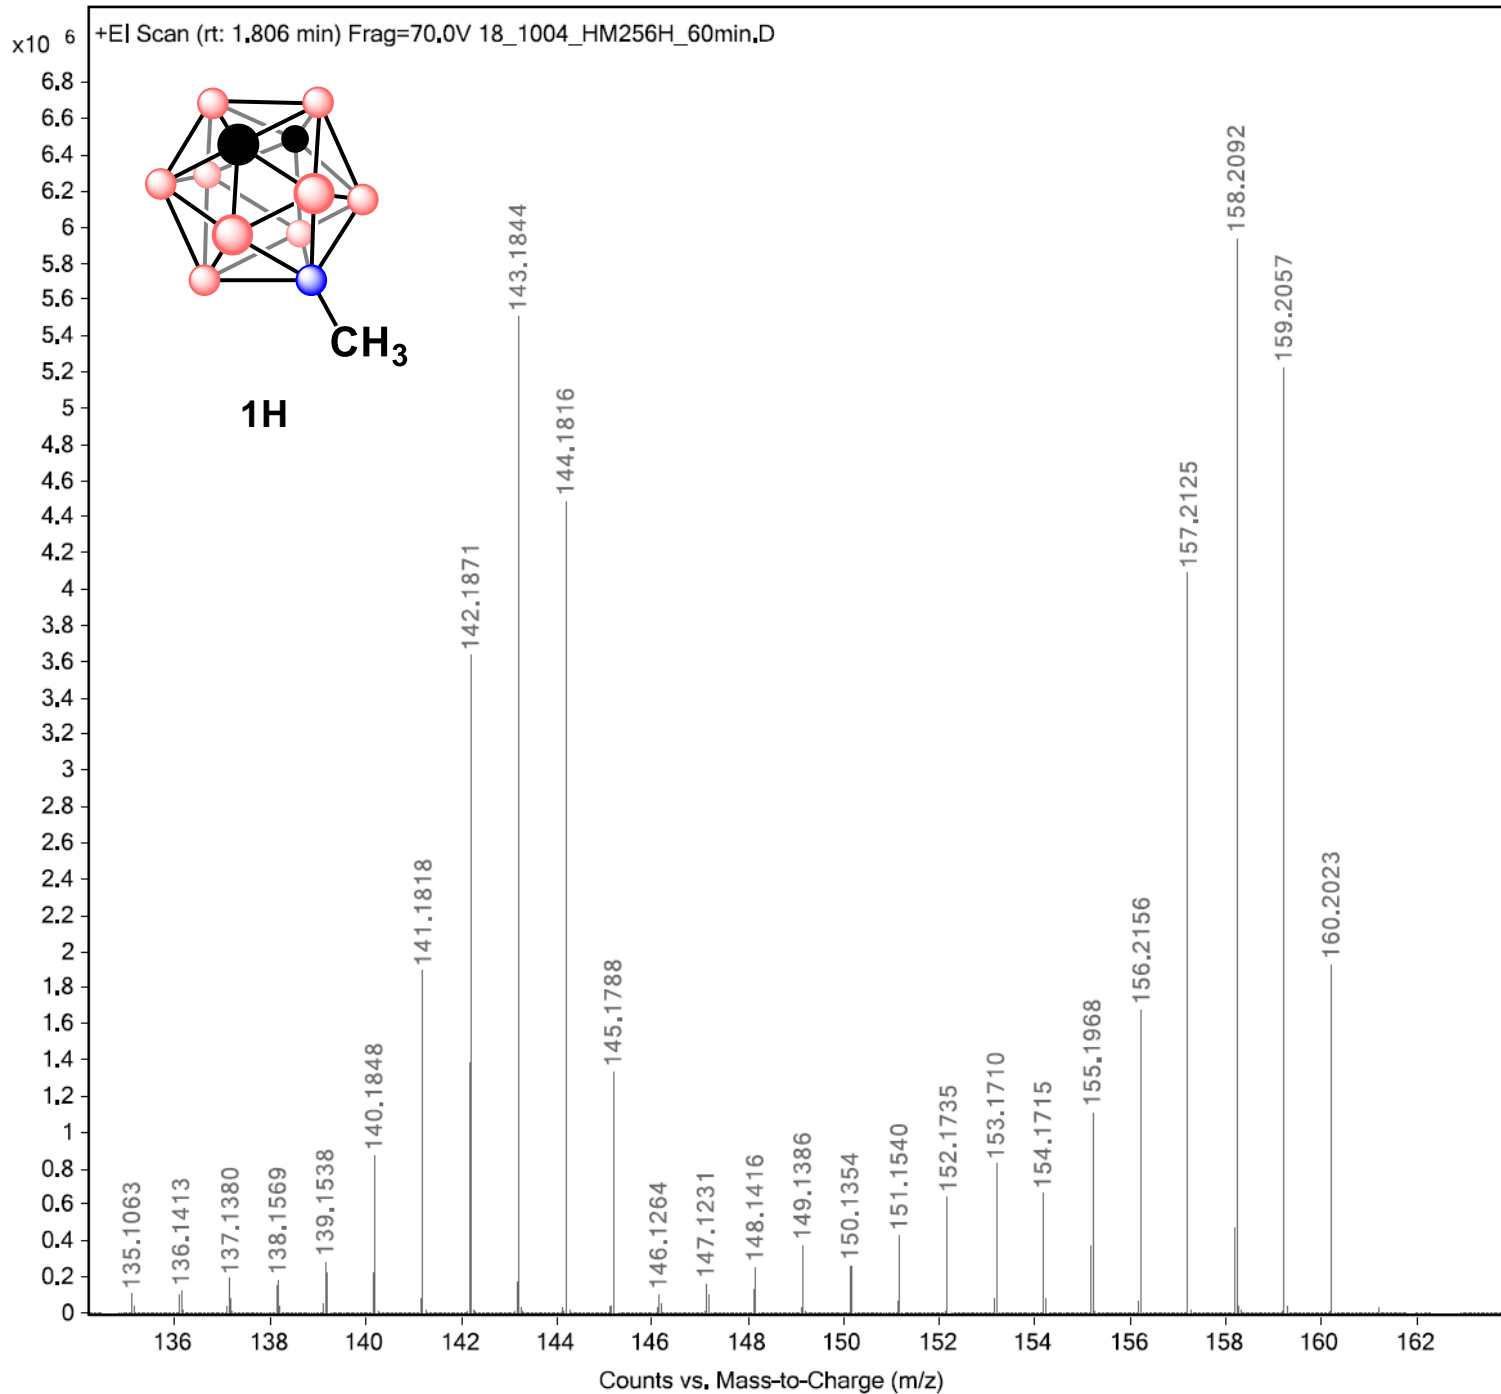

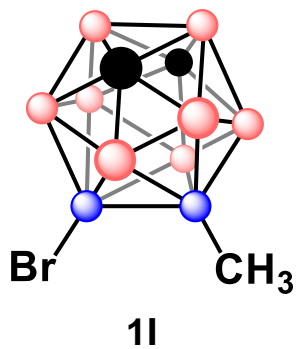

— 2.91

— 0.46

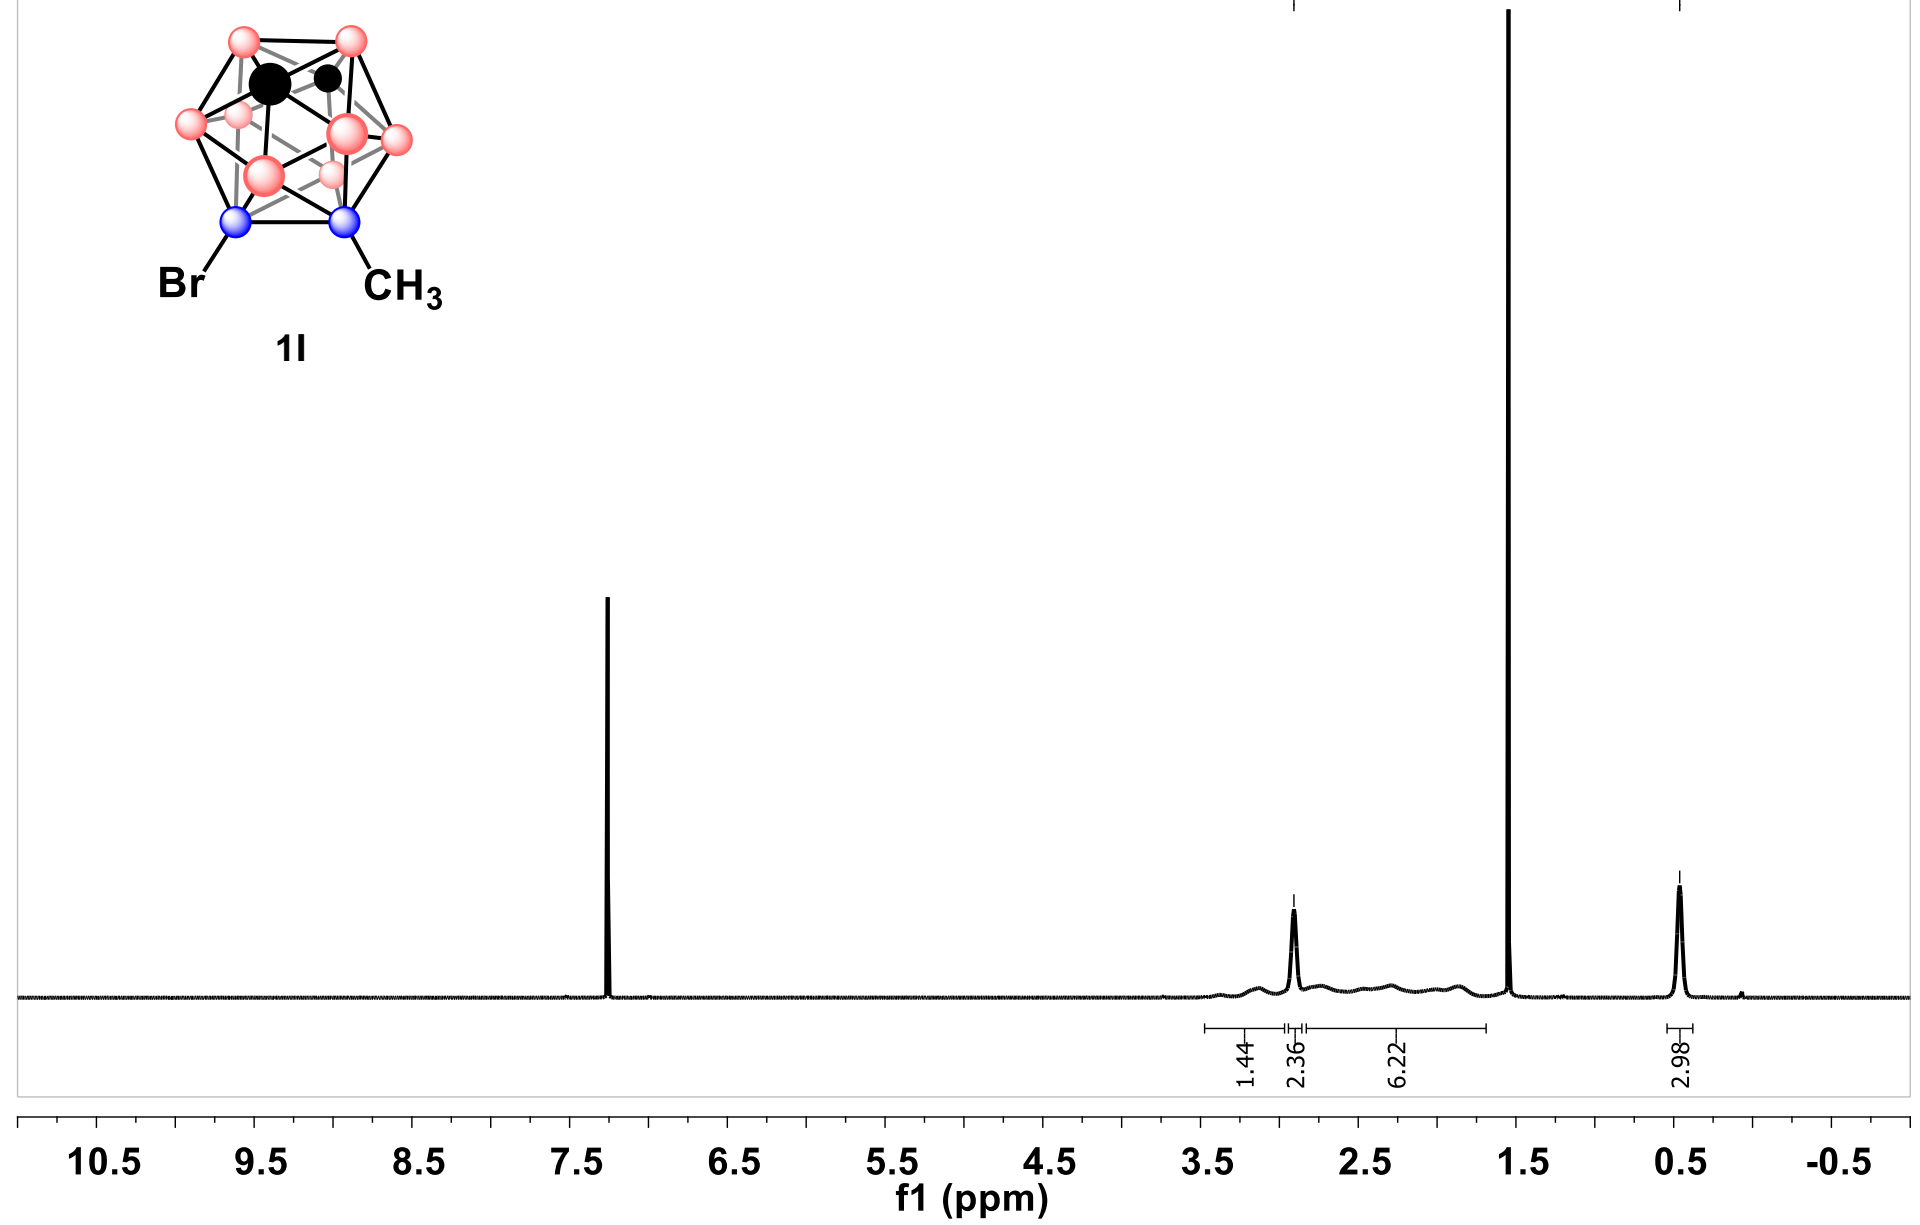



--1.05  
-5.30  
-6.35  
-13.26  
-14.52  
-21.09  
-22.50

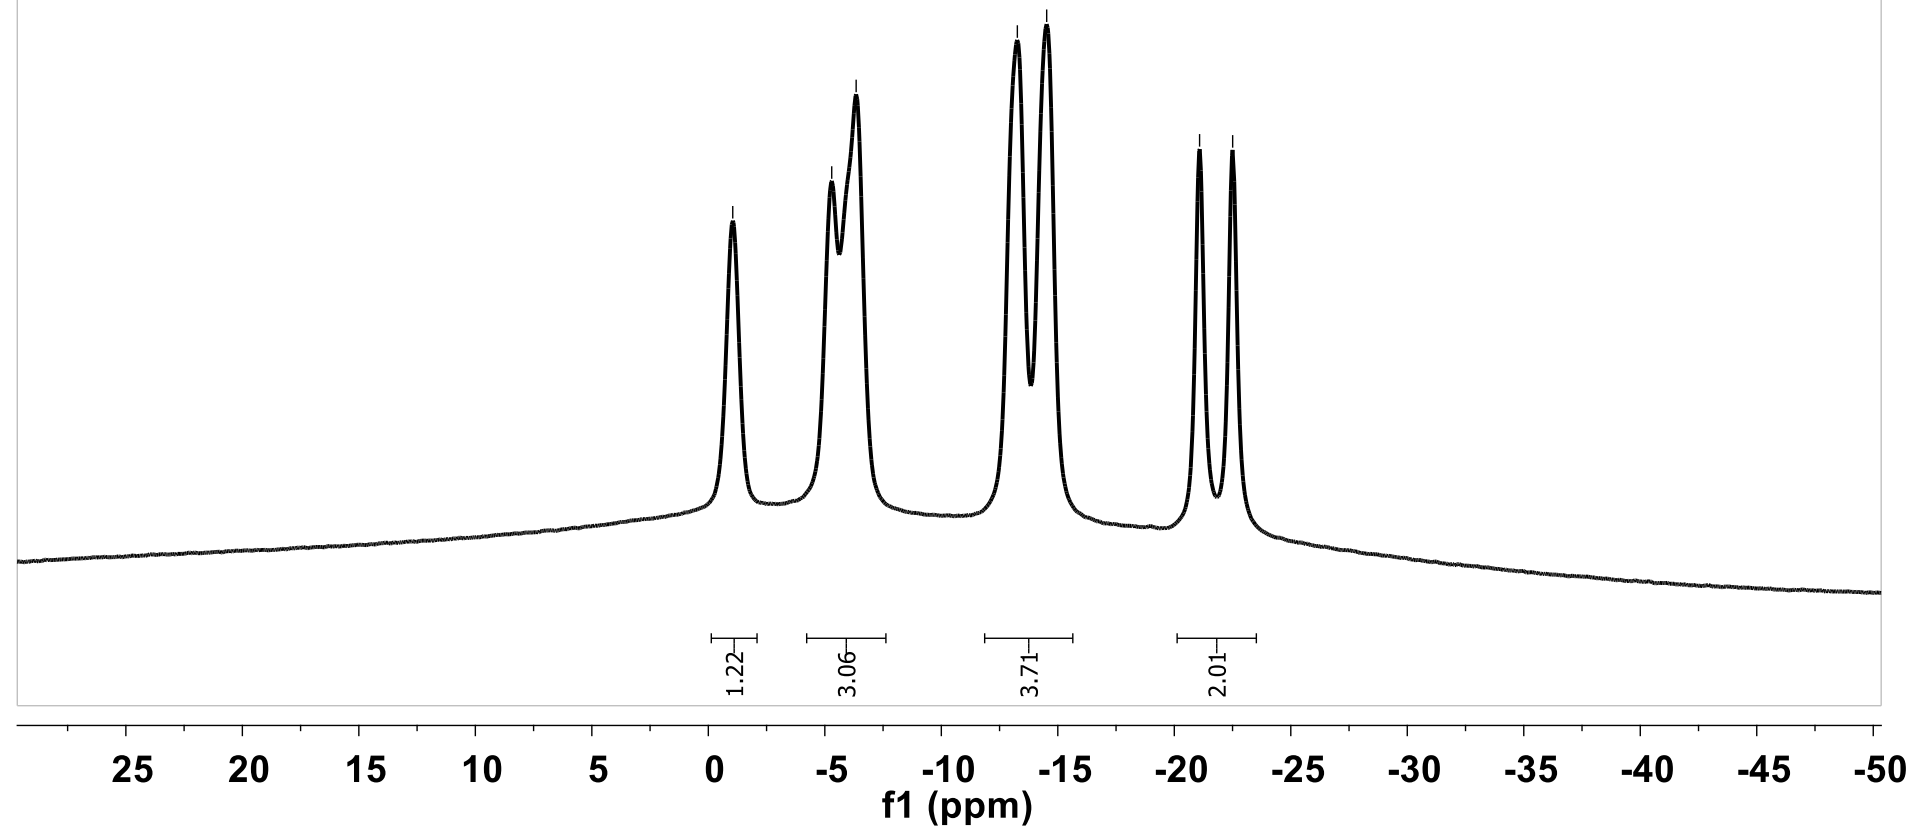

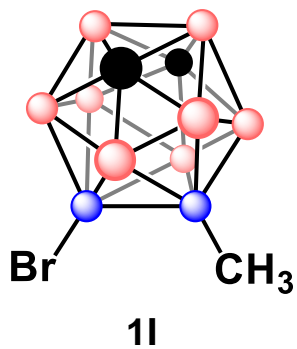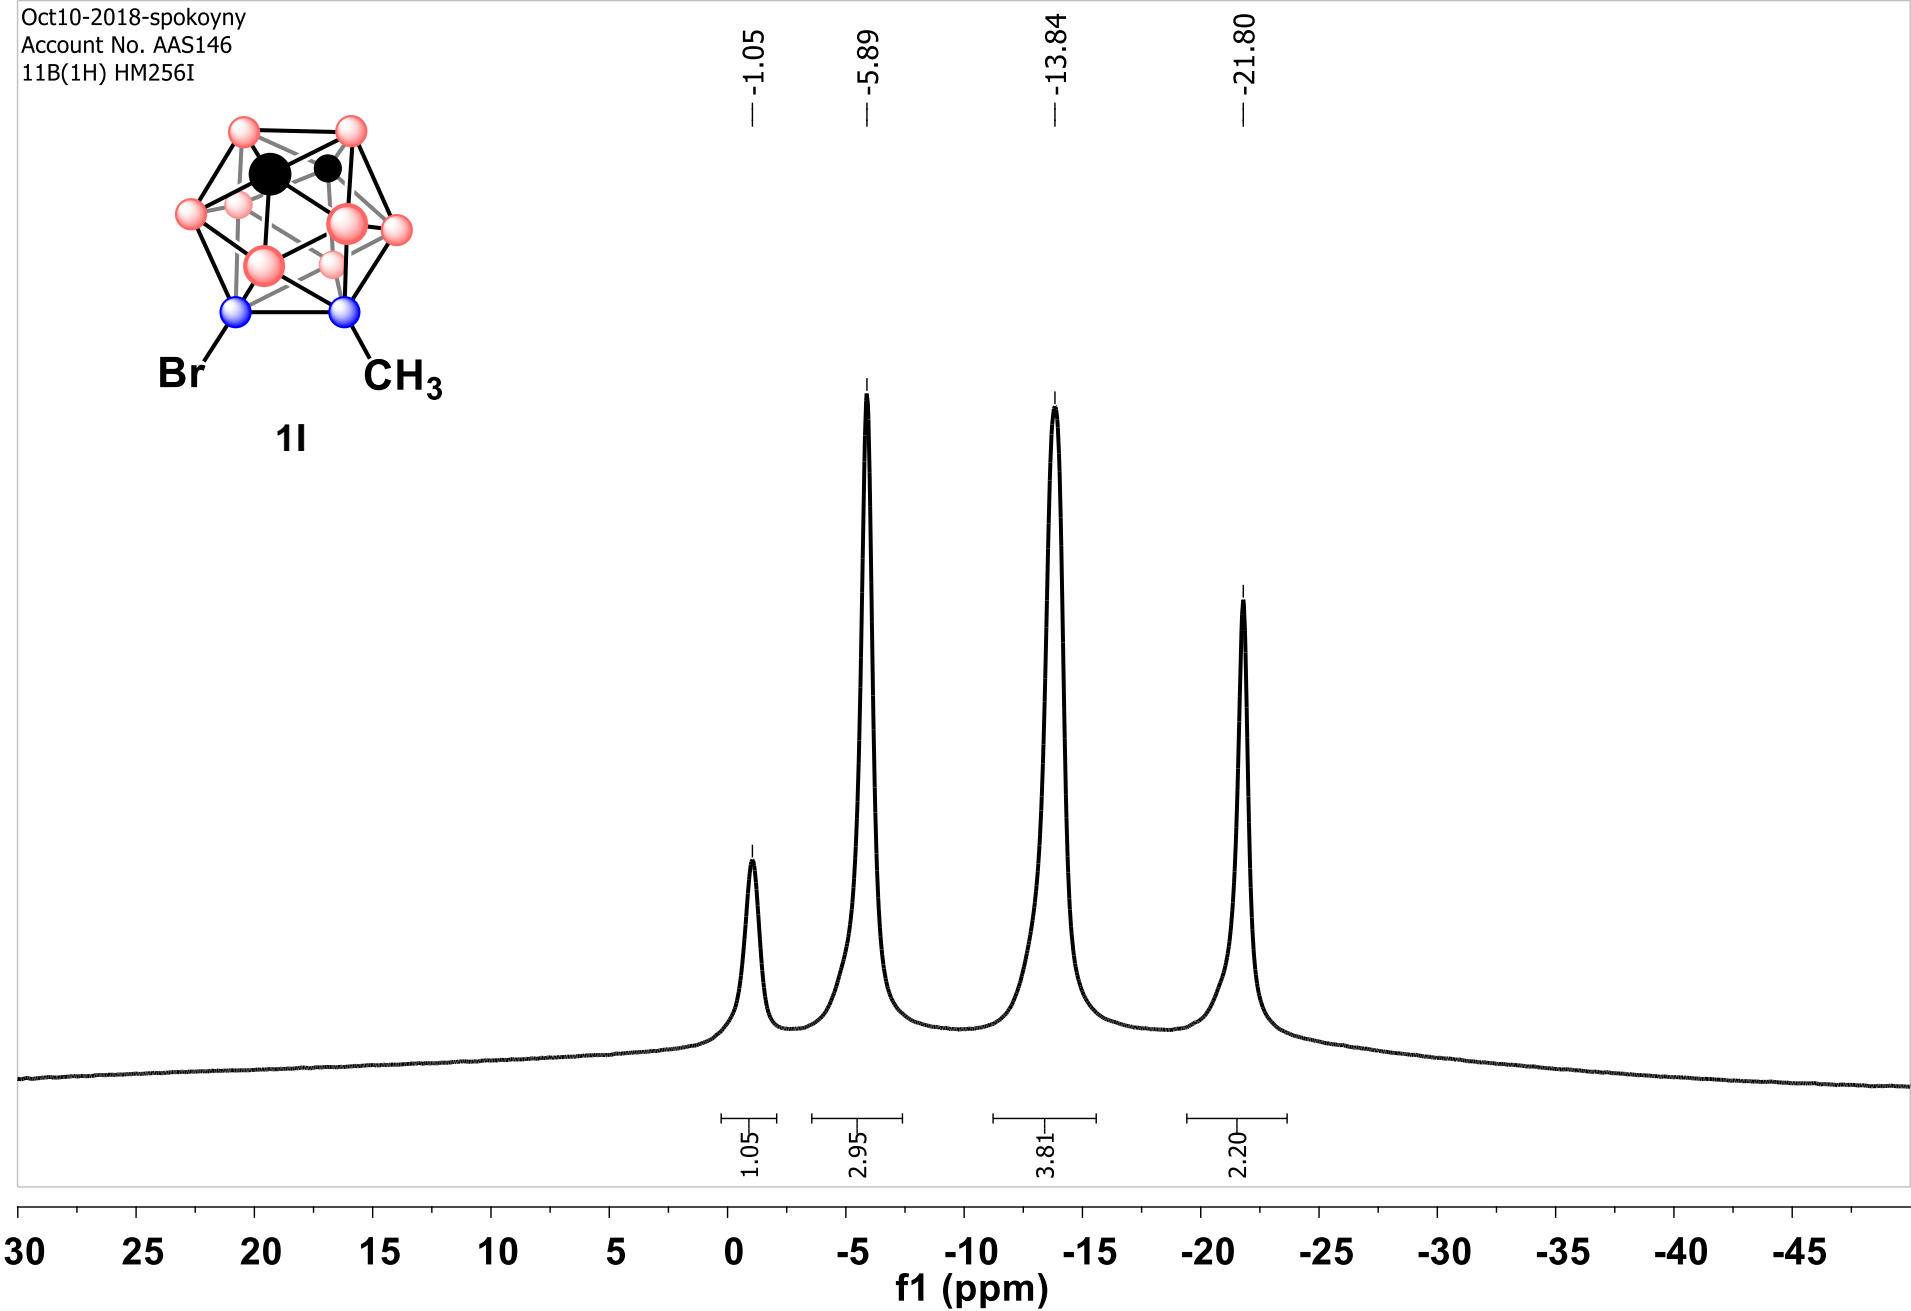



— 52.61

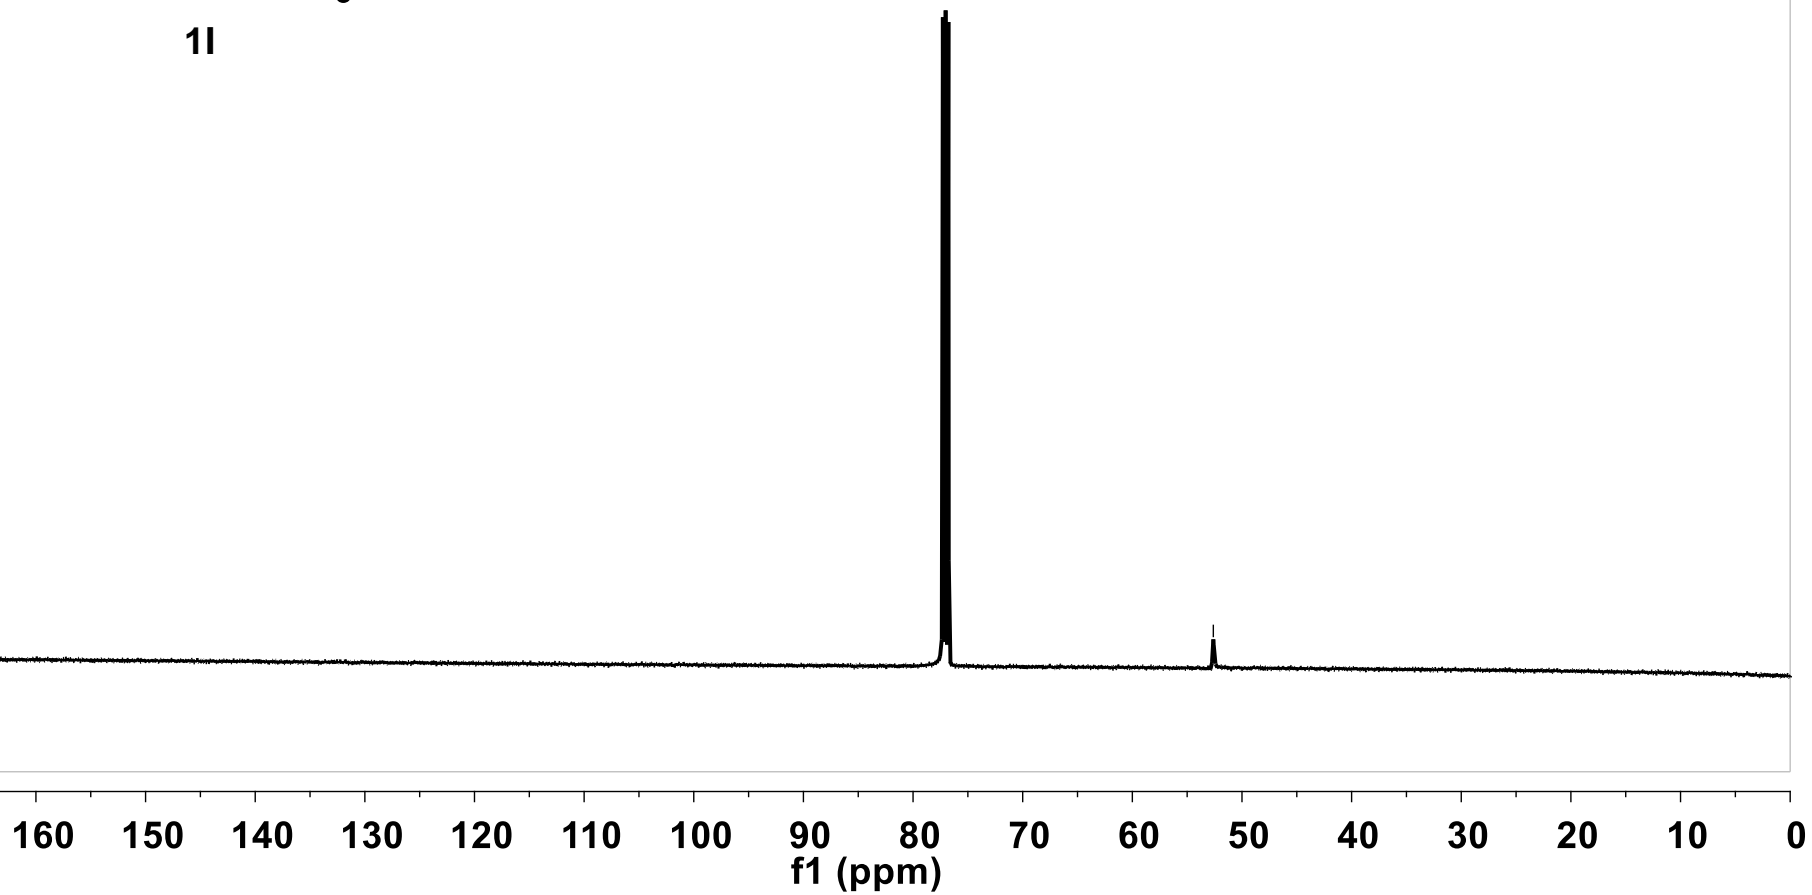

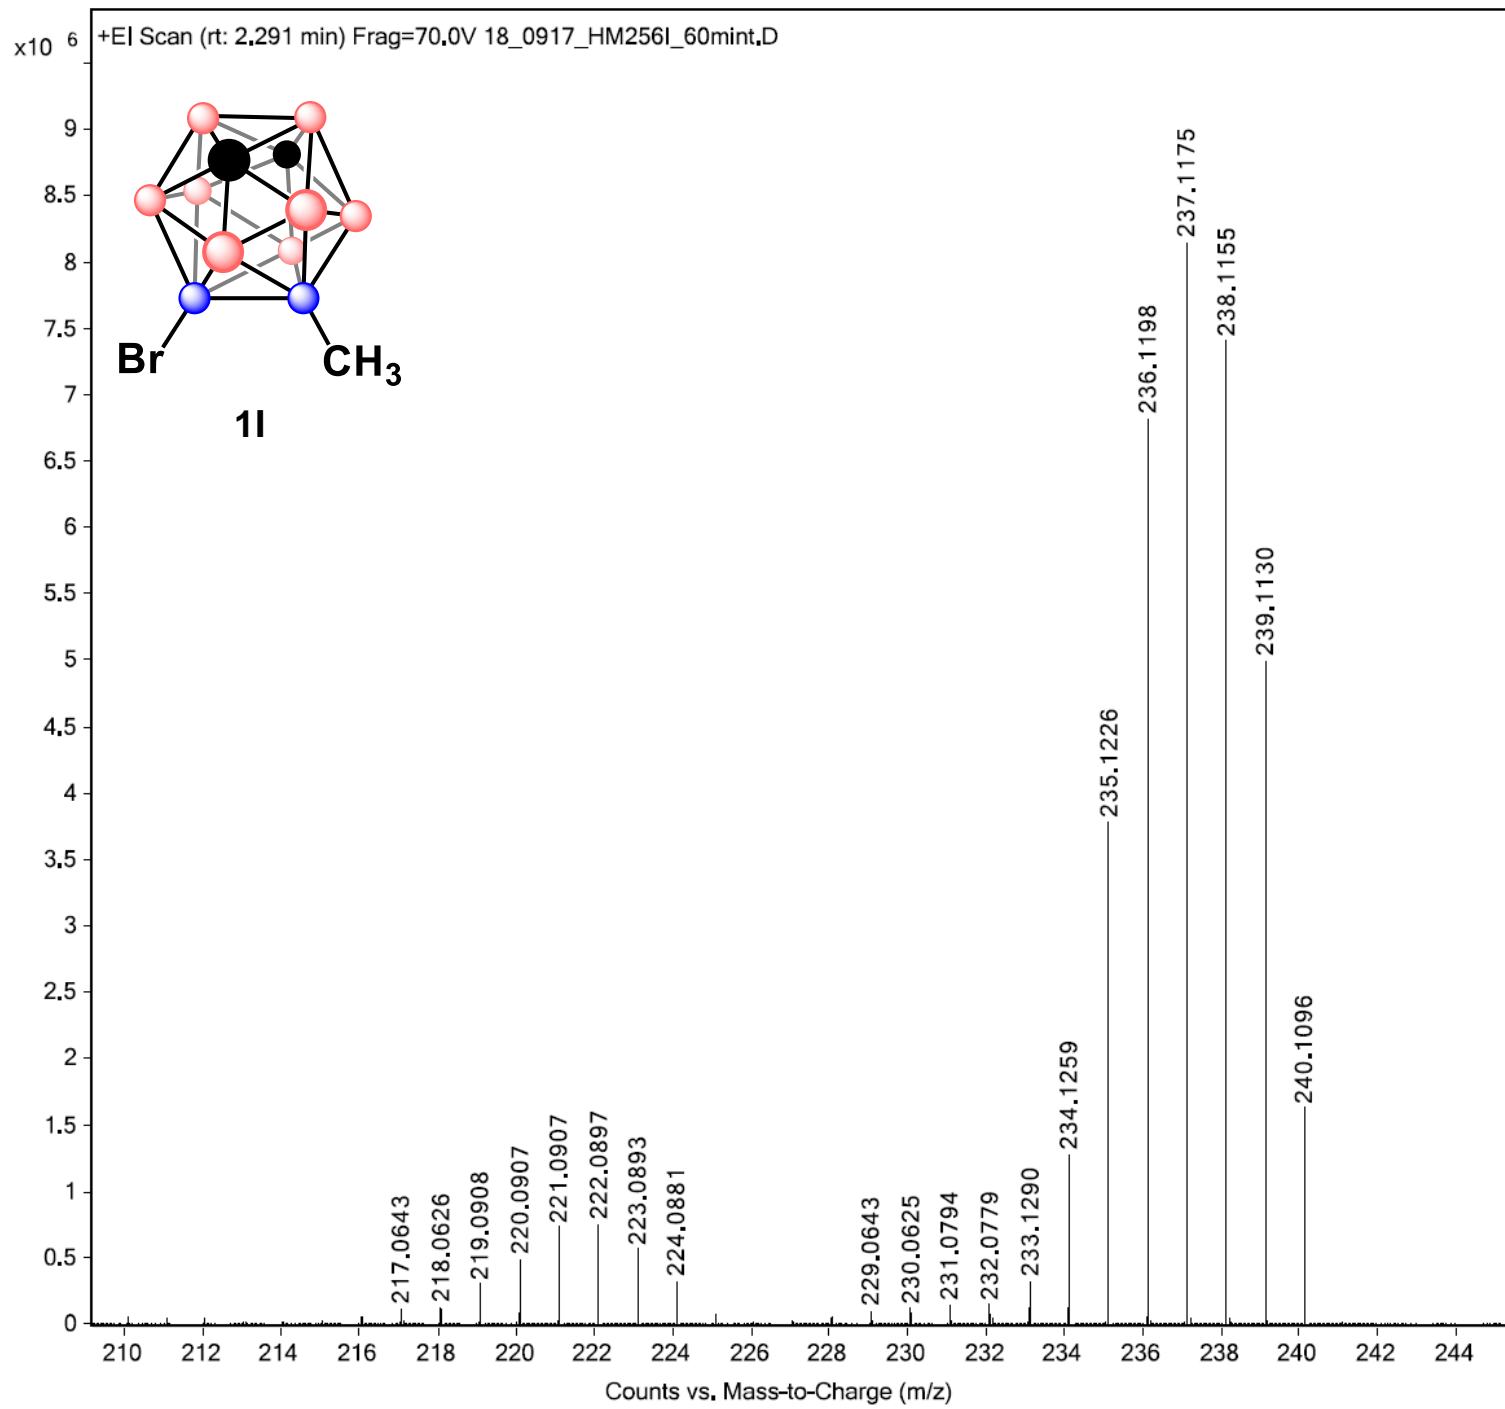



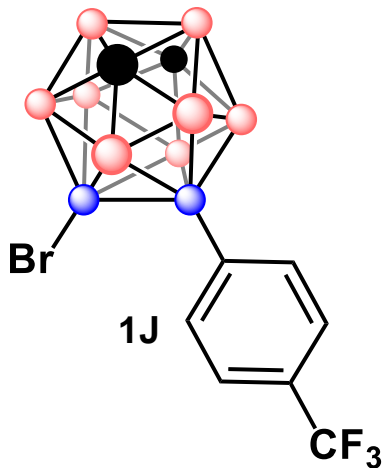

7.67  
7.65  
7.58  
7.56

3.07

1.85  
1.77

1.82  
2.36

6.19

10.5 9.5 8.5 7.5 6.5 5.5 4.5 3.5 2.5 1.5 0.5 -0.5

f1 (ppm)

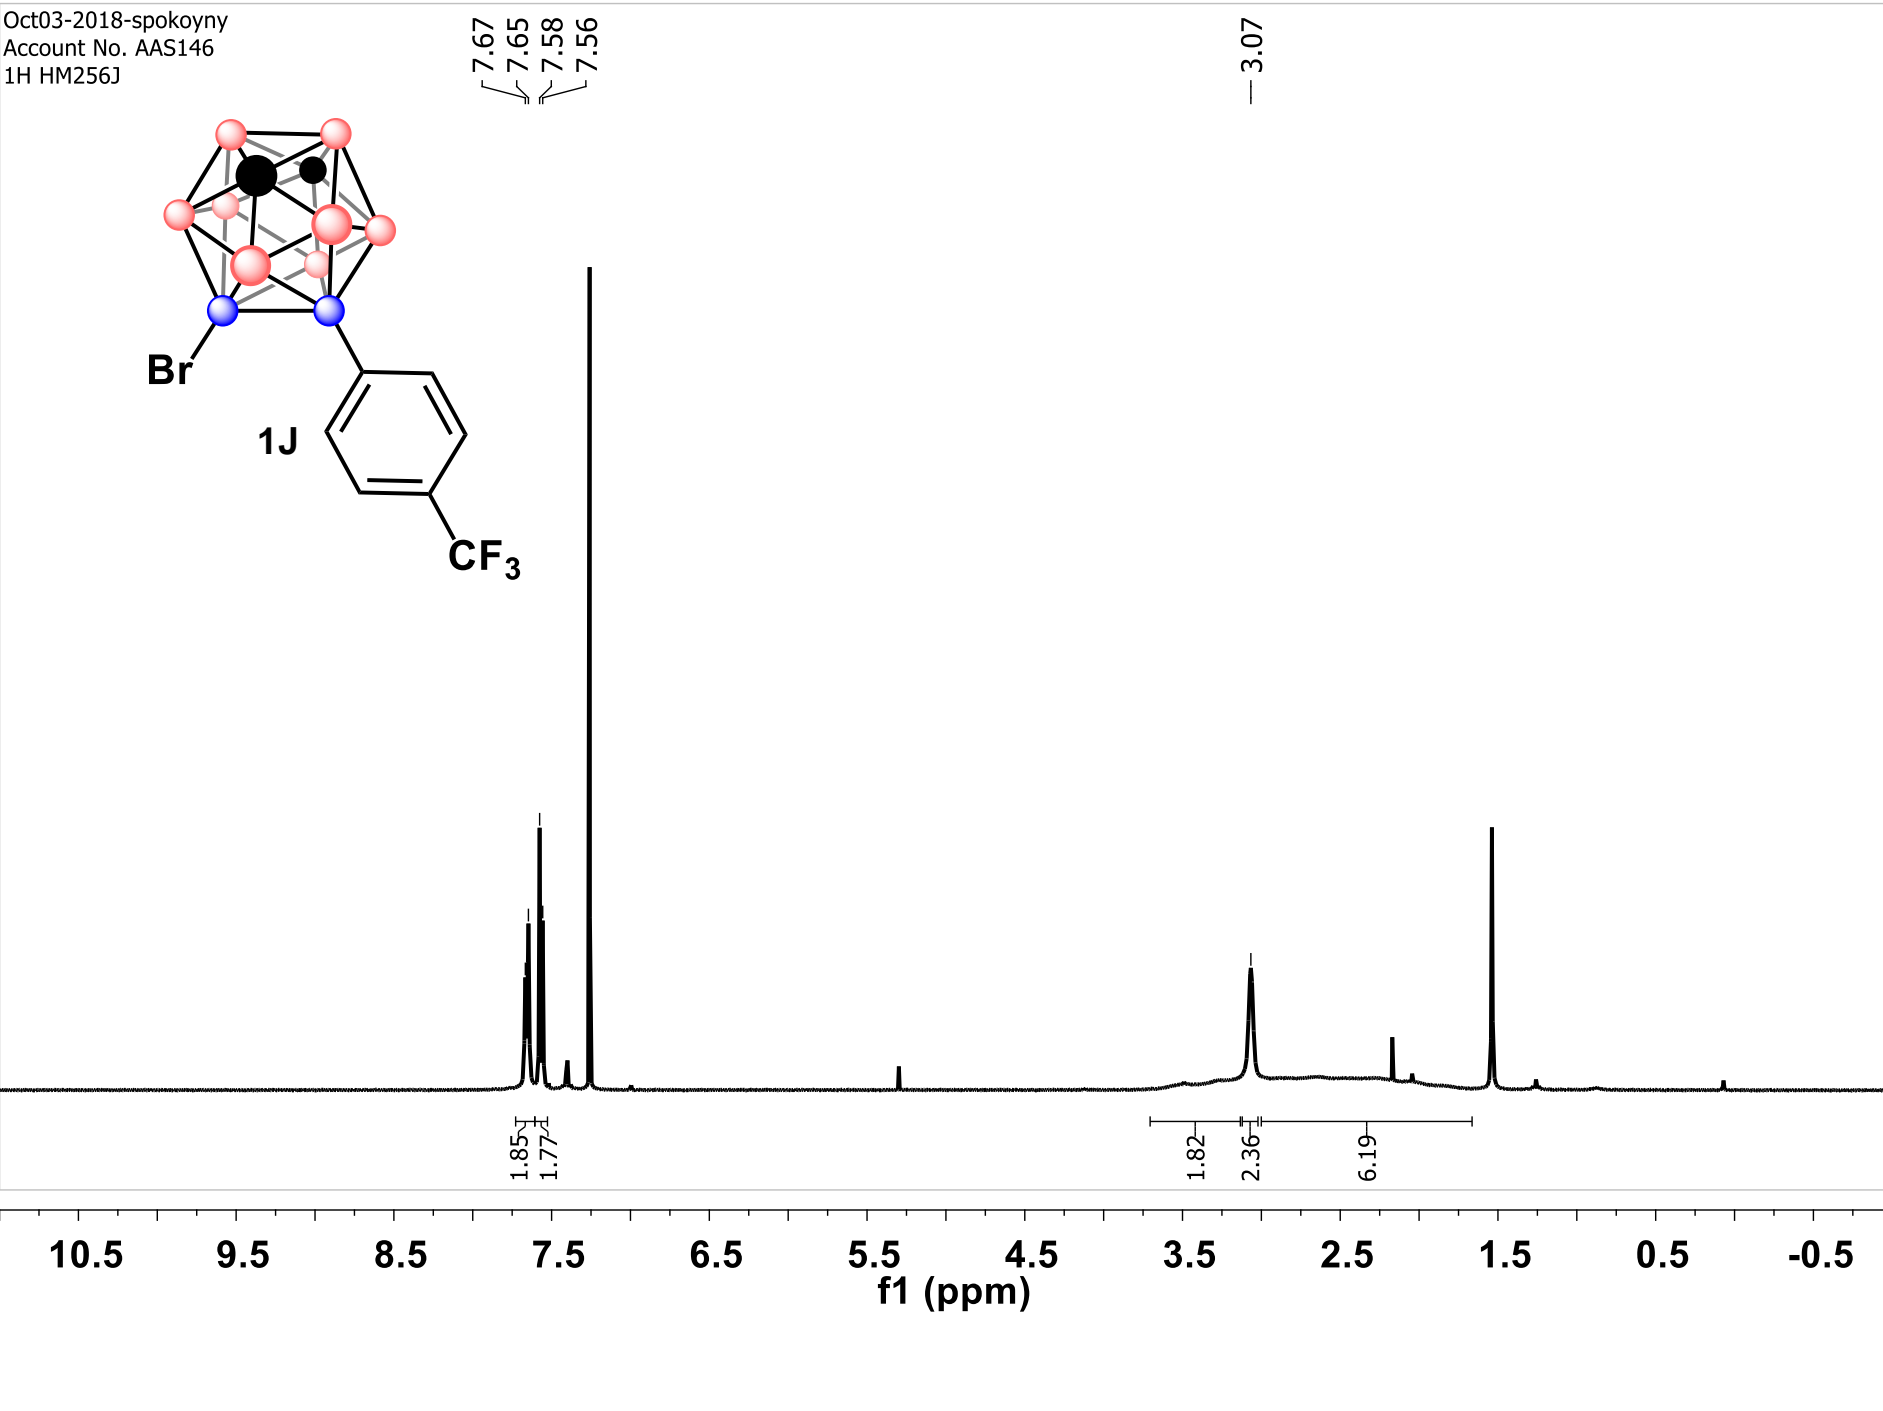

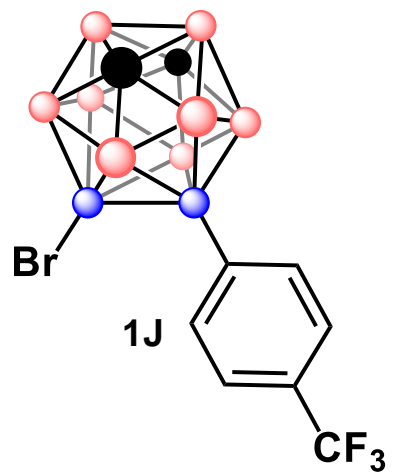

-- -1.18  
- -6.03  
- -7.26  
/ -12.51  
/ -13.73  
/ -14.57  
/ -19.63  
/ -20.62  
/ -22.00

1.44  
2.79  
3.52  
2.24

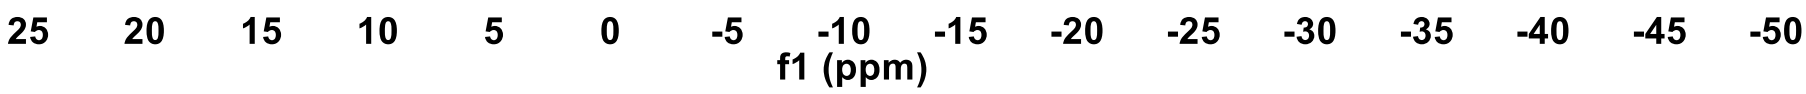



--1.18  
--6.44  
~13.15  
~13.90  
~20.31  
~21.27

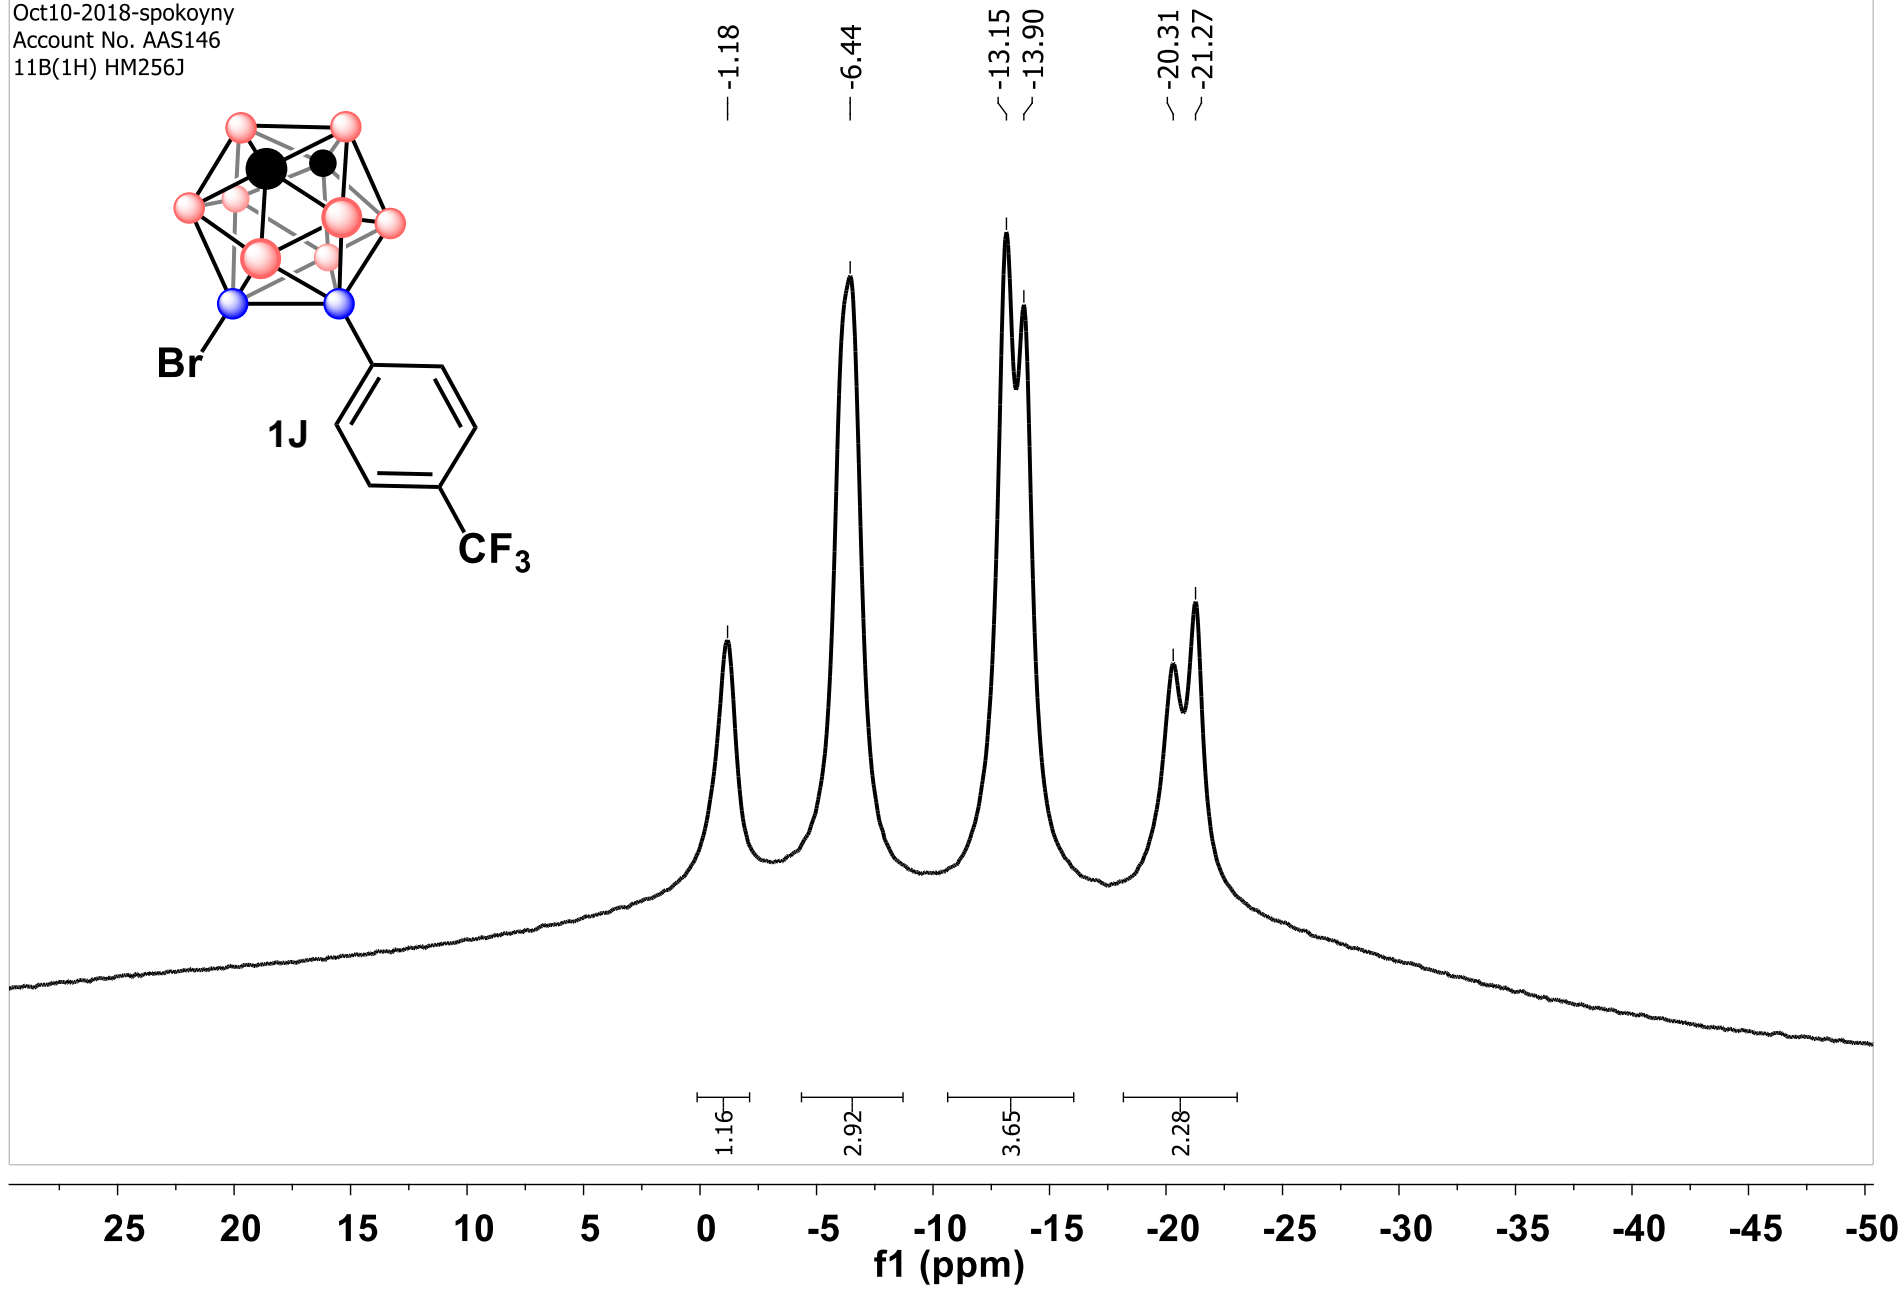

Oct22-2018-spokoyny  
Account No. AAS146  
13C HM256J

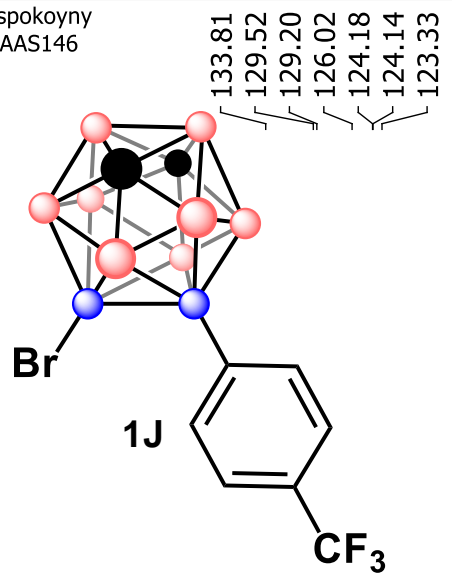

— 53.42

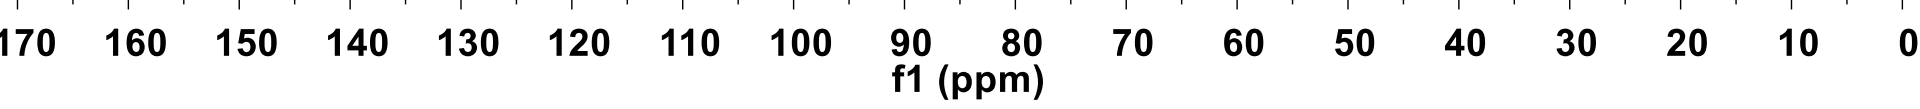

Oct03-2018-spokoyny  
Account No. AAS146  
19F HM256J

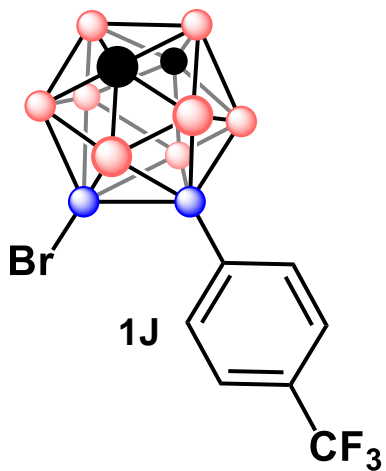

--62.59

-5

-20

-35

-50

-65

-80

-95

-115

-135

f1 (ppm)



Jul12-2018-spokoyny  
Account No. AAS153  
KA-I-133 pure CDCl3 1H

8.42  
8.40  
7.71  
7.70  
7.54  
7.52  
7.32  
7.31  
4.99

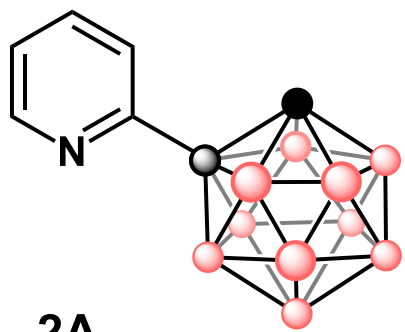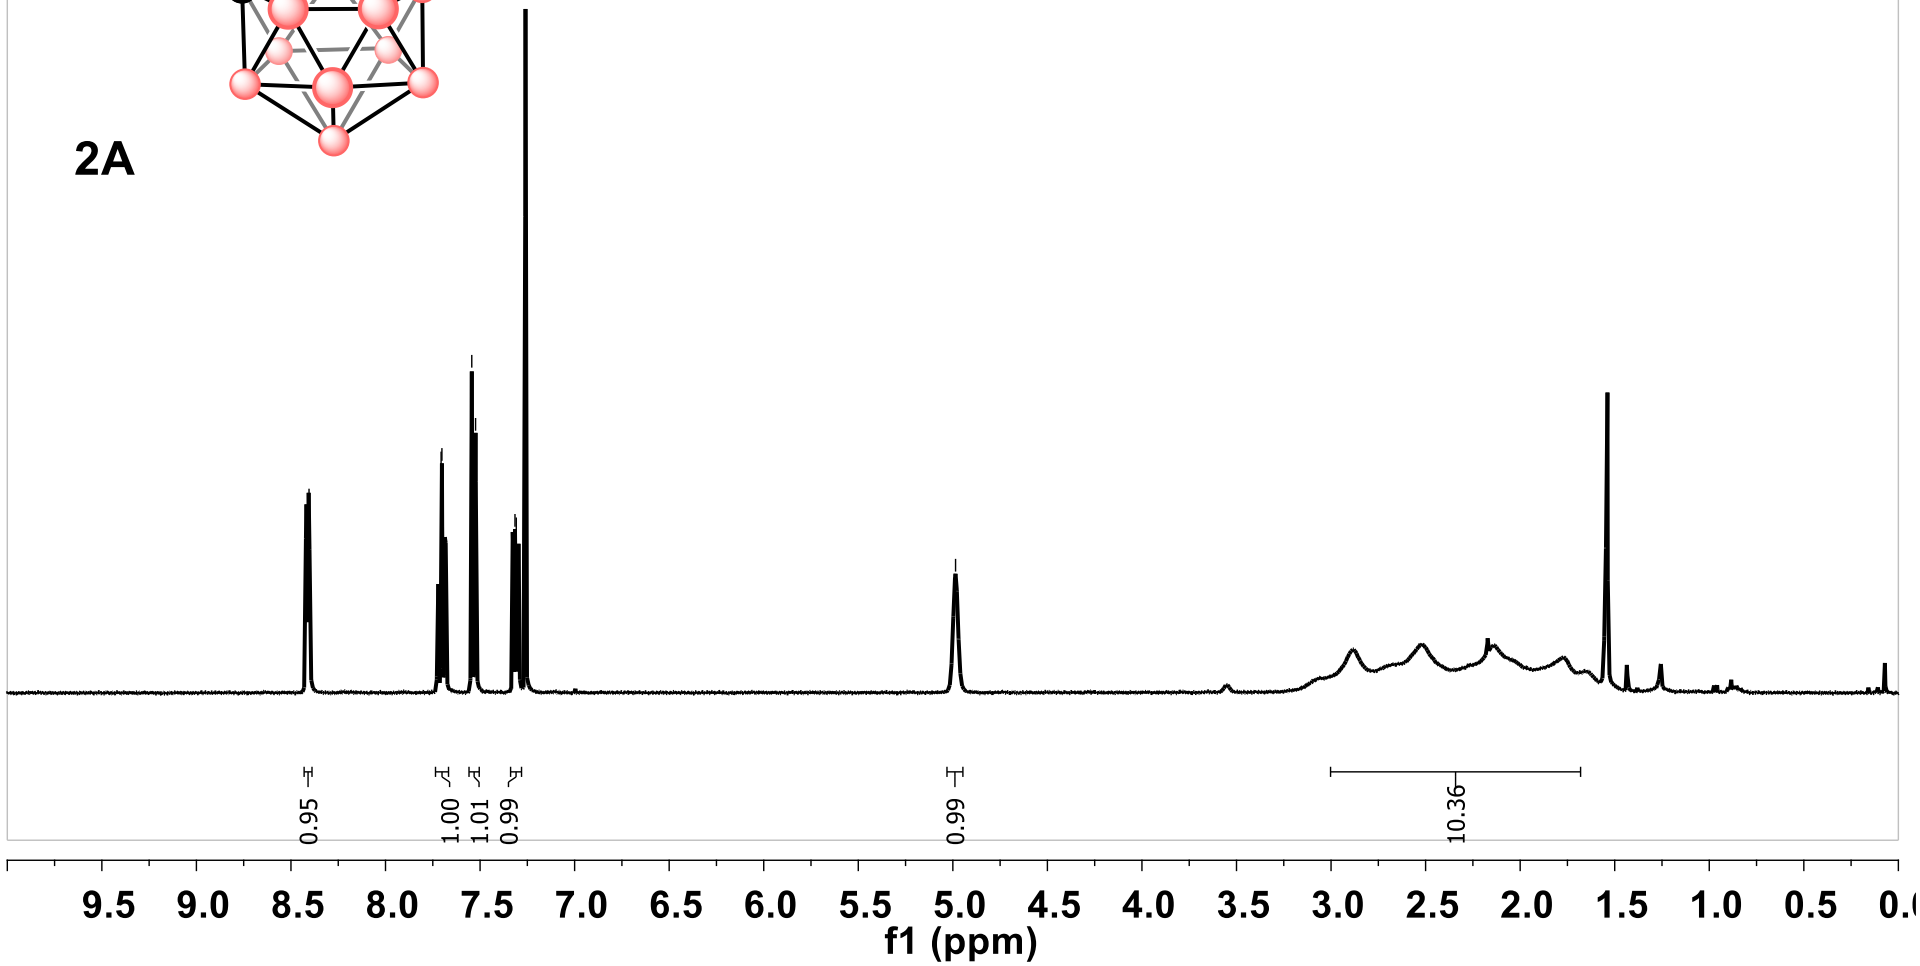

KA-I-133 11B CDCl3  
11B acquisition-no H decoupling

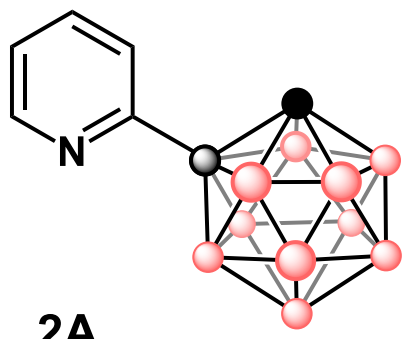

- -3.41
- / -7.75
- \ -8.69
- / -10.80
- \ -11.75
- / -12.57
- \ -13.59

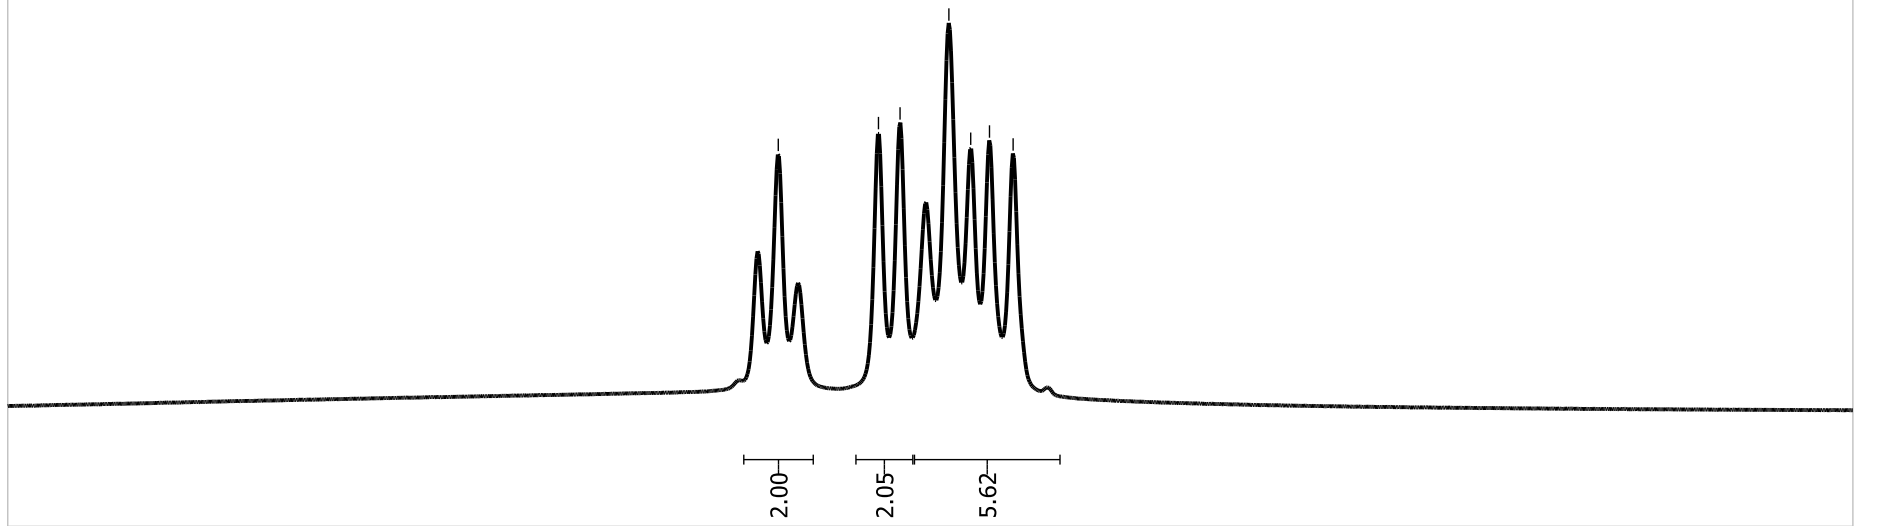

30 25 20 15 10 5 0 -5 -10 -15 -20 -25 -30 -35 -40 -45 -50  
f1 (ppm)



KA-I-133 11B{1H} CDCl3  
11B acquisition

~ -2.99  
~ -3.81  
~ -8.22  
~ -10.37  
~ -11.25  
~ -13.08

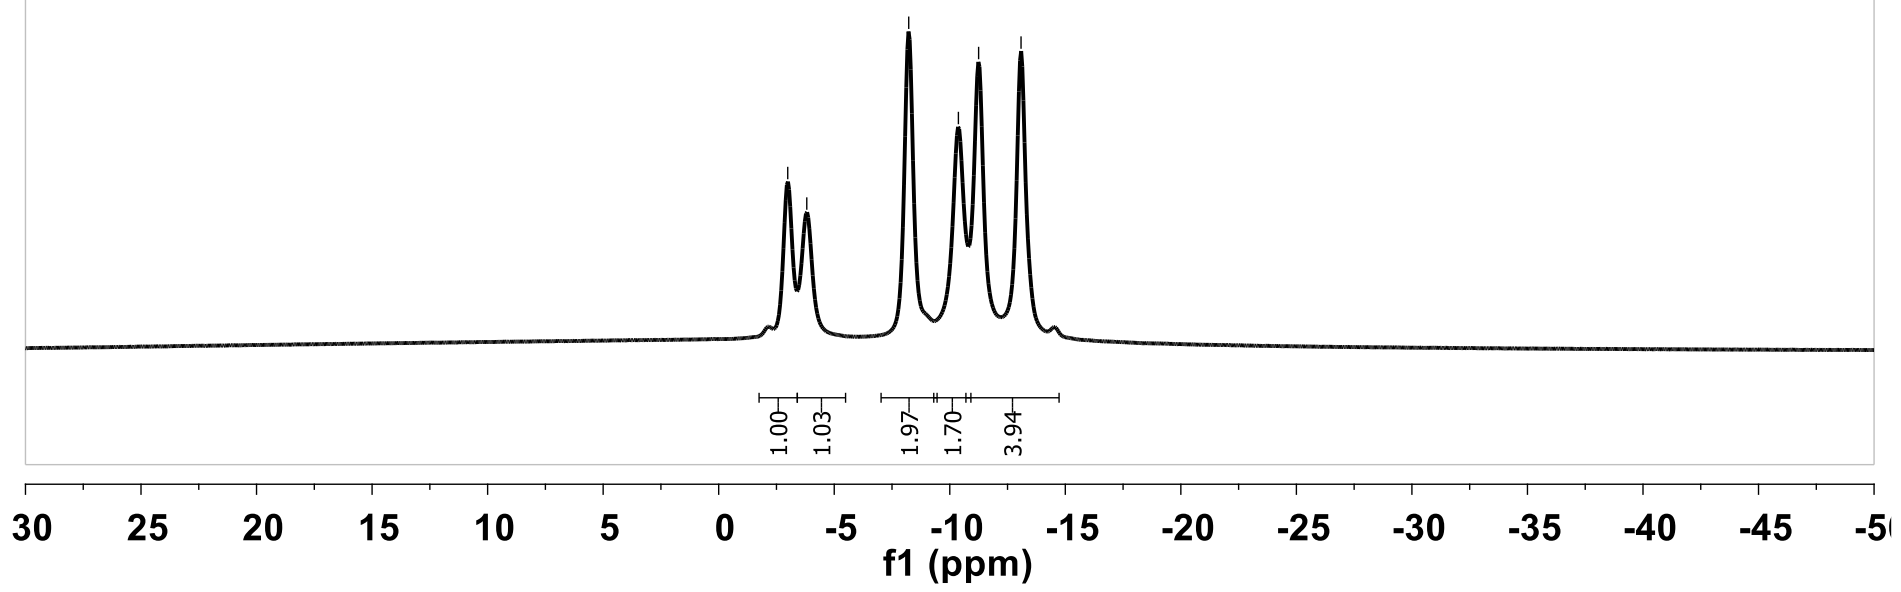

KA-I-133 13C  
13C

~ 151.14

~ 148.86

— 137.47

— 124.42

~ 121.65

— 75.37

— 56.95

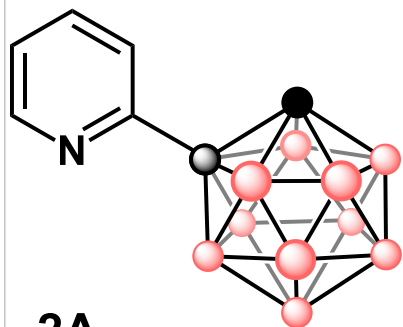

2A

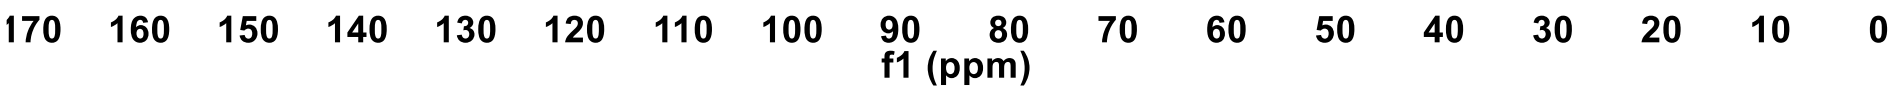

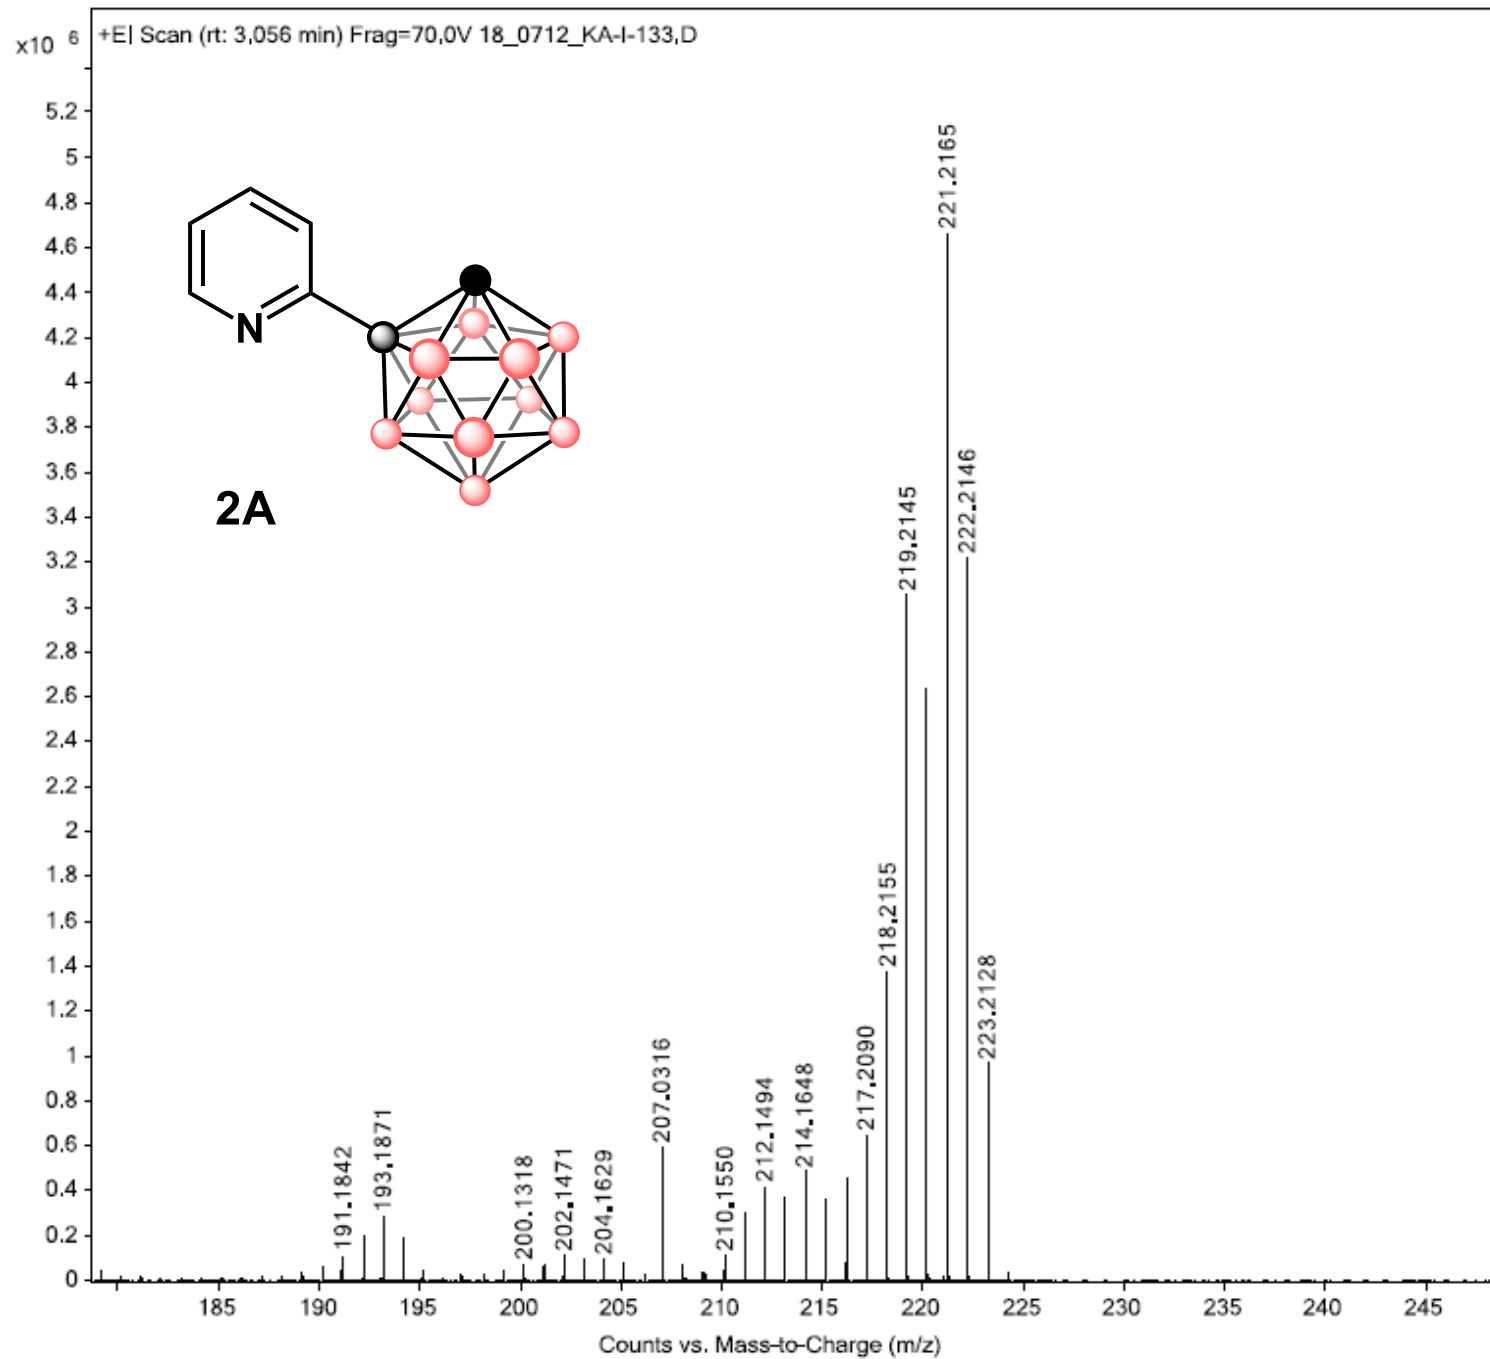

Jul20-2018-spok  
Account No. AAS153  
KA-I-139 pure CDCl<sub>3</sub> 1H

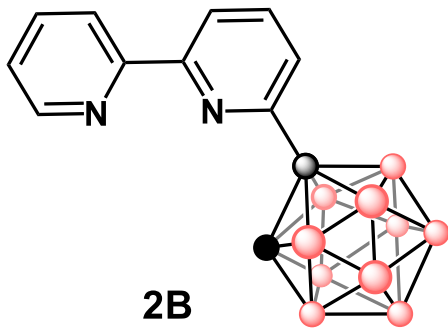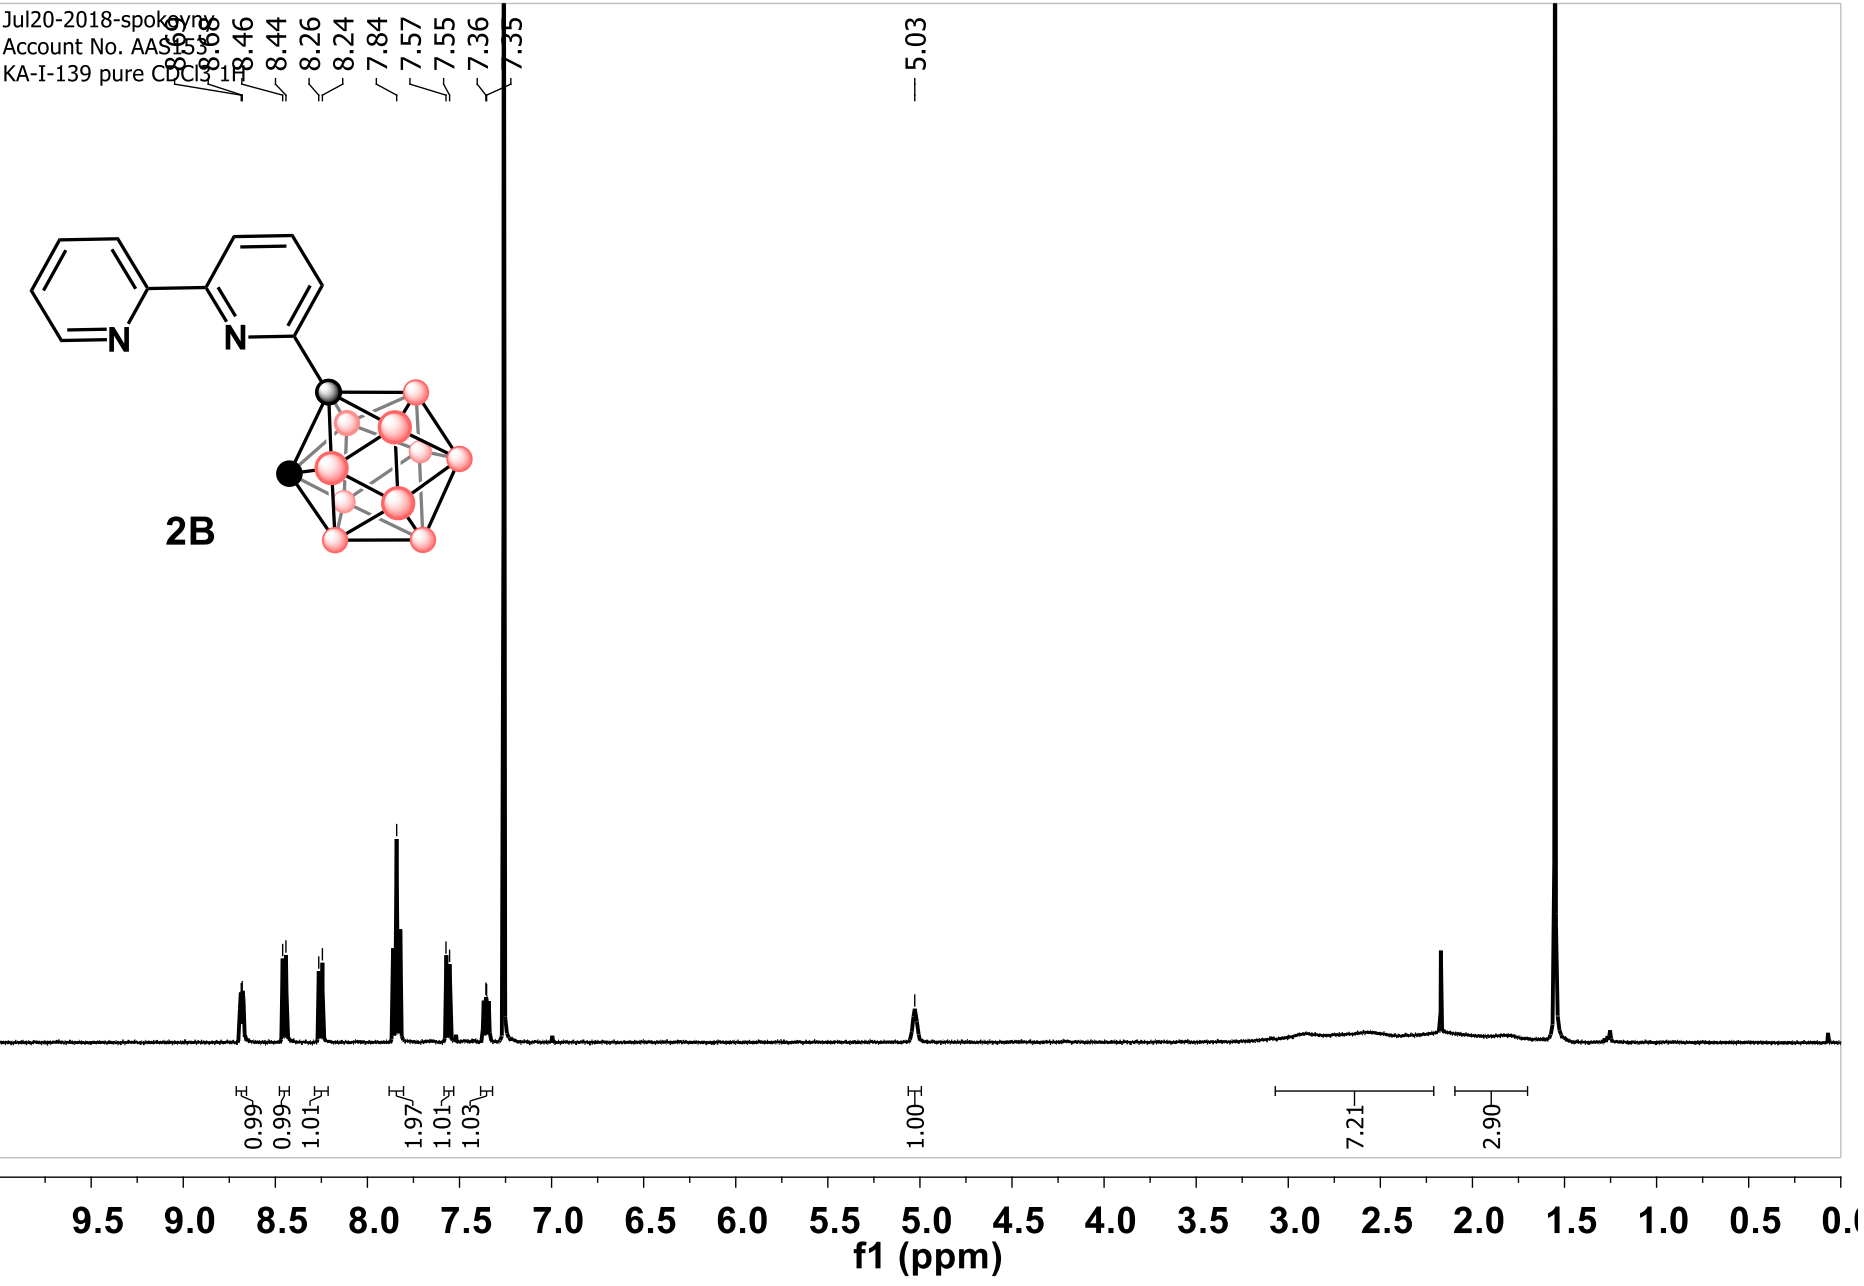

KA-I-139 (CM sample) 11B  
11B acquisiton-no H decoupling

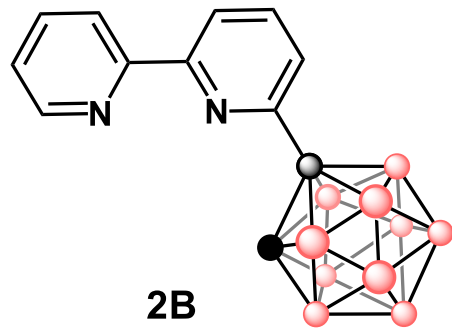

- ~ -2.32
- ~ -3.29
- ~ -7.75
- ~ -8.69
- ~ -10.68
- ~ -11.64
- ~ -12.49
- ~ -13.49

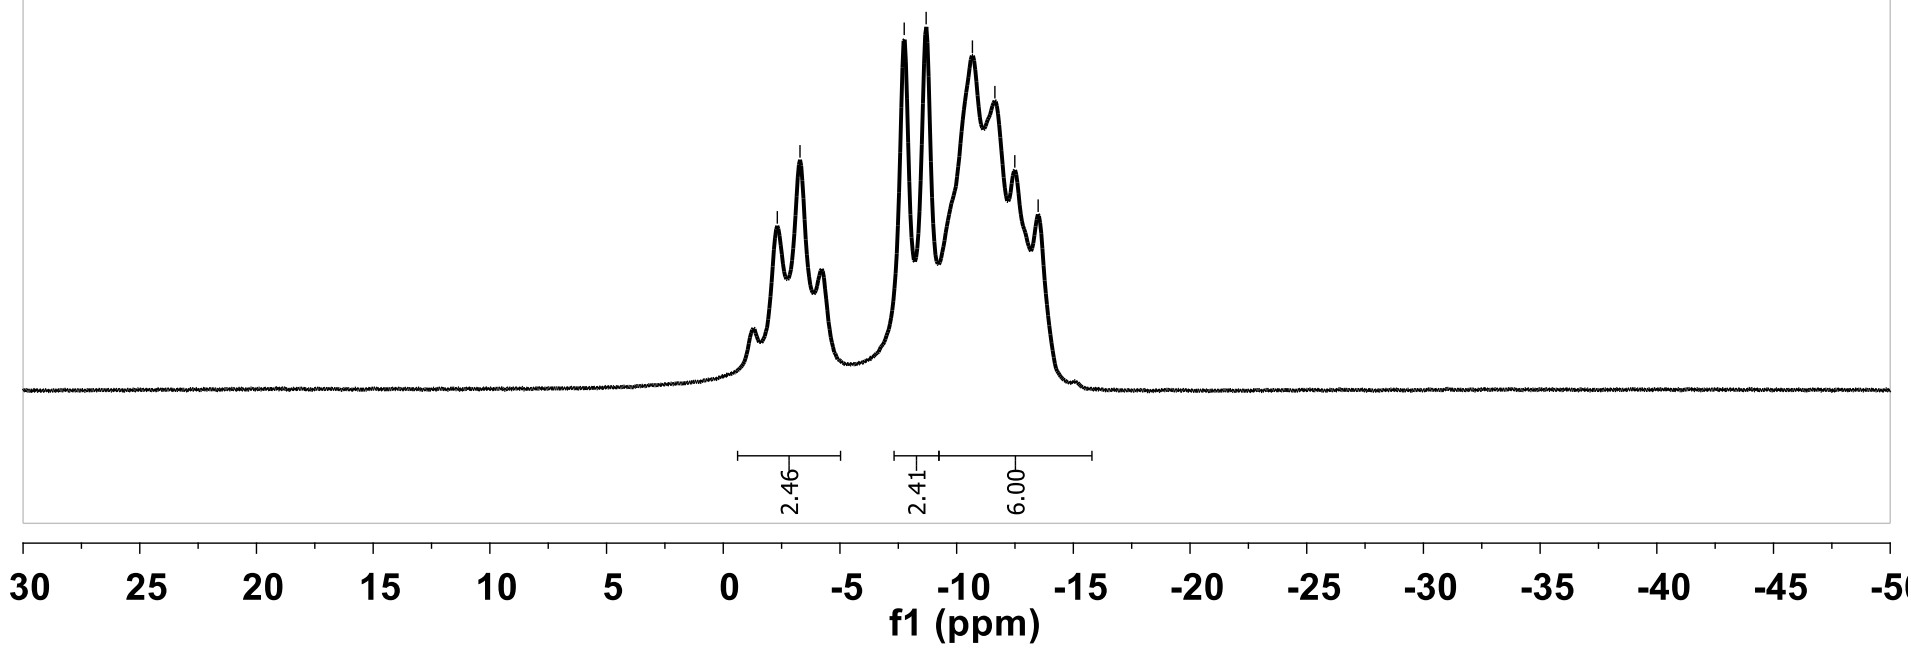

KA-I-139 (CM sample) 11B{1H}  
11B acquisition-with H decoupling

— -3.26  
— -8.67  
— -11.53  
— -13.45

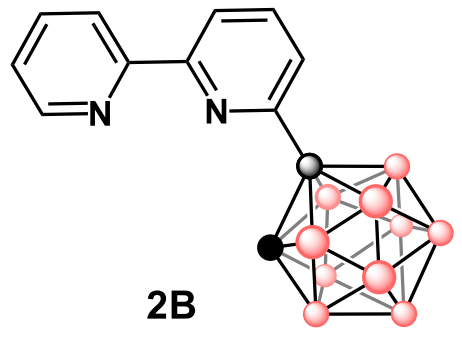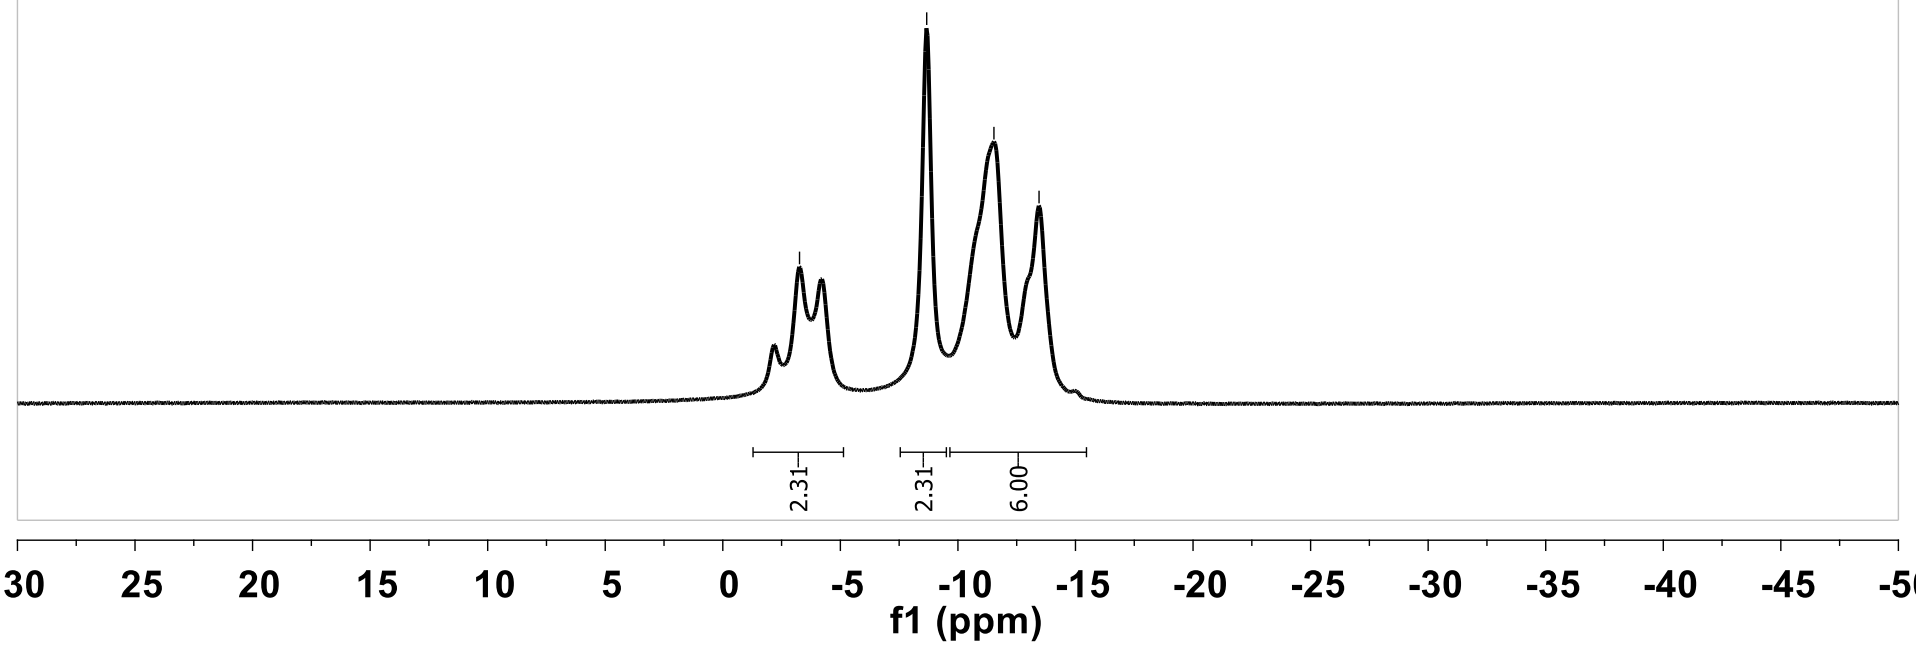

KA-I-139 purified  
13C

155.46  
154.85  
150.36  
149.54  
138.58  
137.15  
124.54  
121.77  
121.60  
121.23

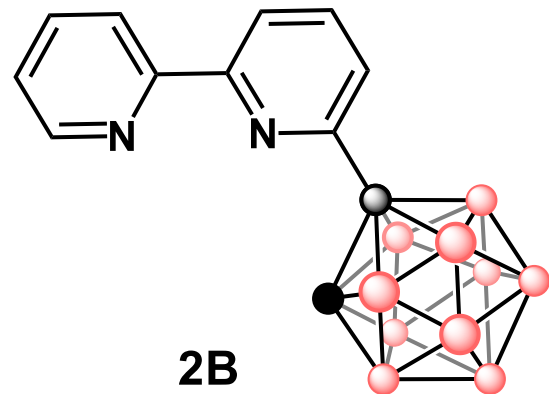

75.49

56.94

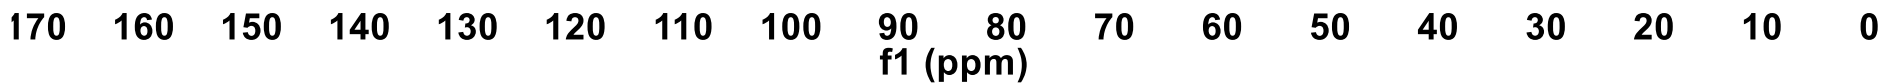





Sep10-2018-spokoyno  
Account No. AAS128  
KK-3-156? post activated carbon, acetone-d6, 1H

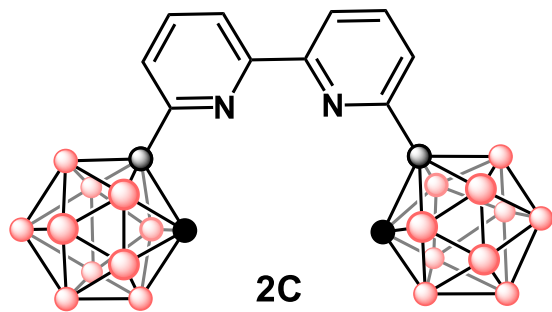

— 5.74

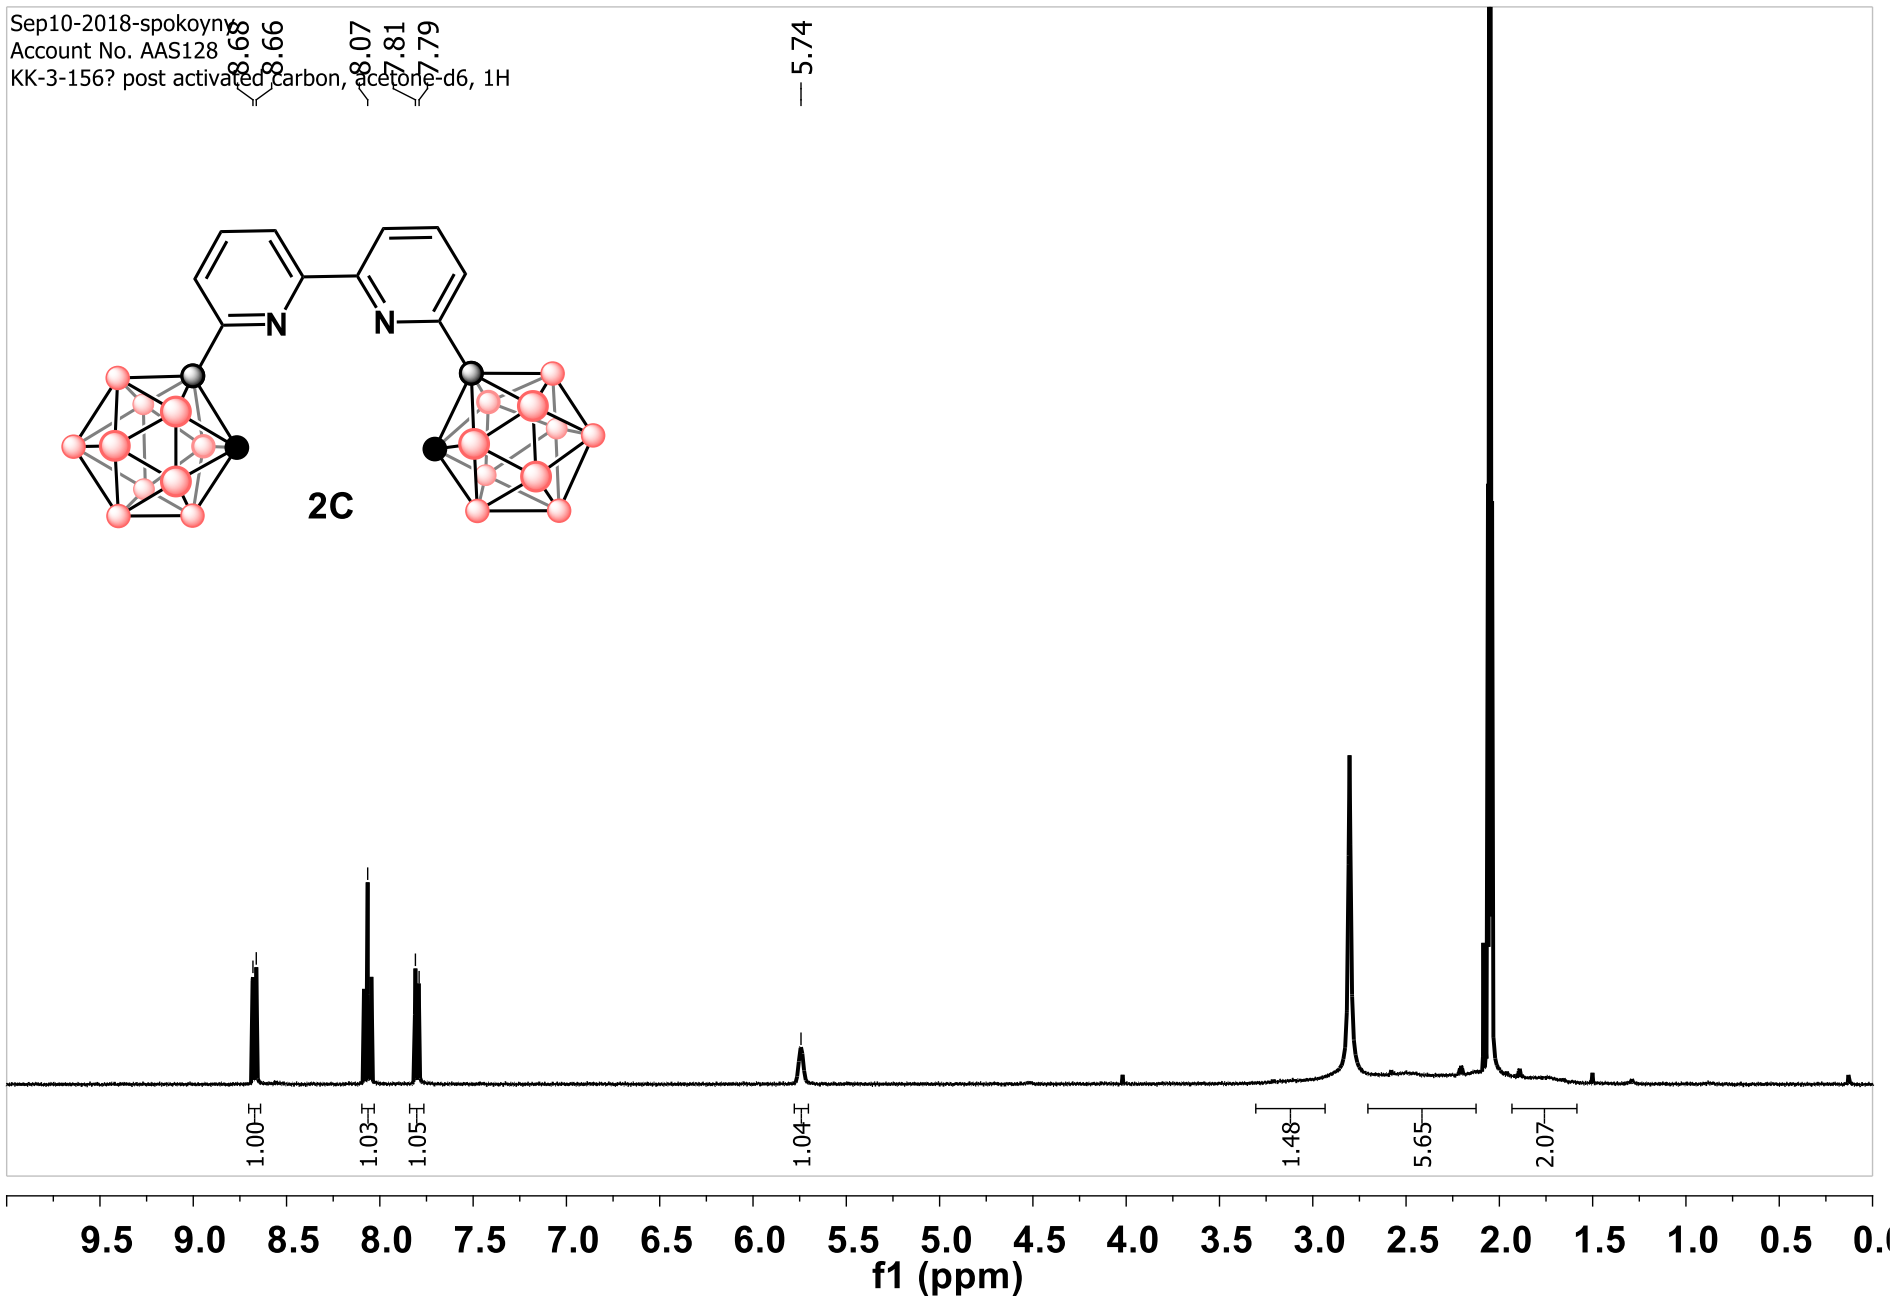

NMR  
11B acquisition-no H decoupling

— -4.13  
~ -8.54  
~ -9.48  
~ -11.20  
~ -13.83

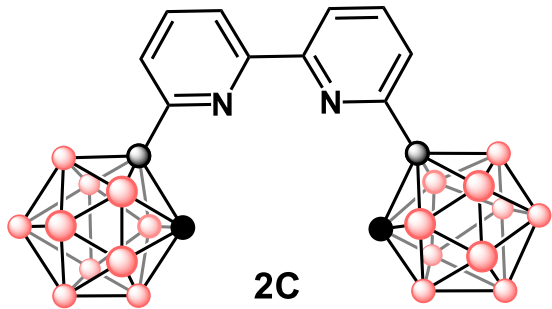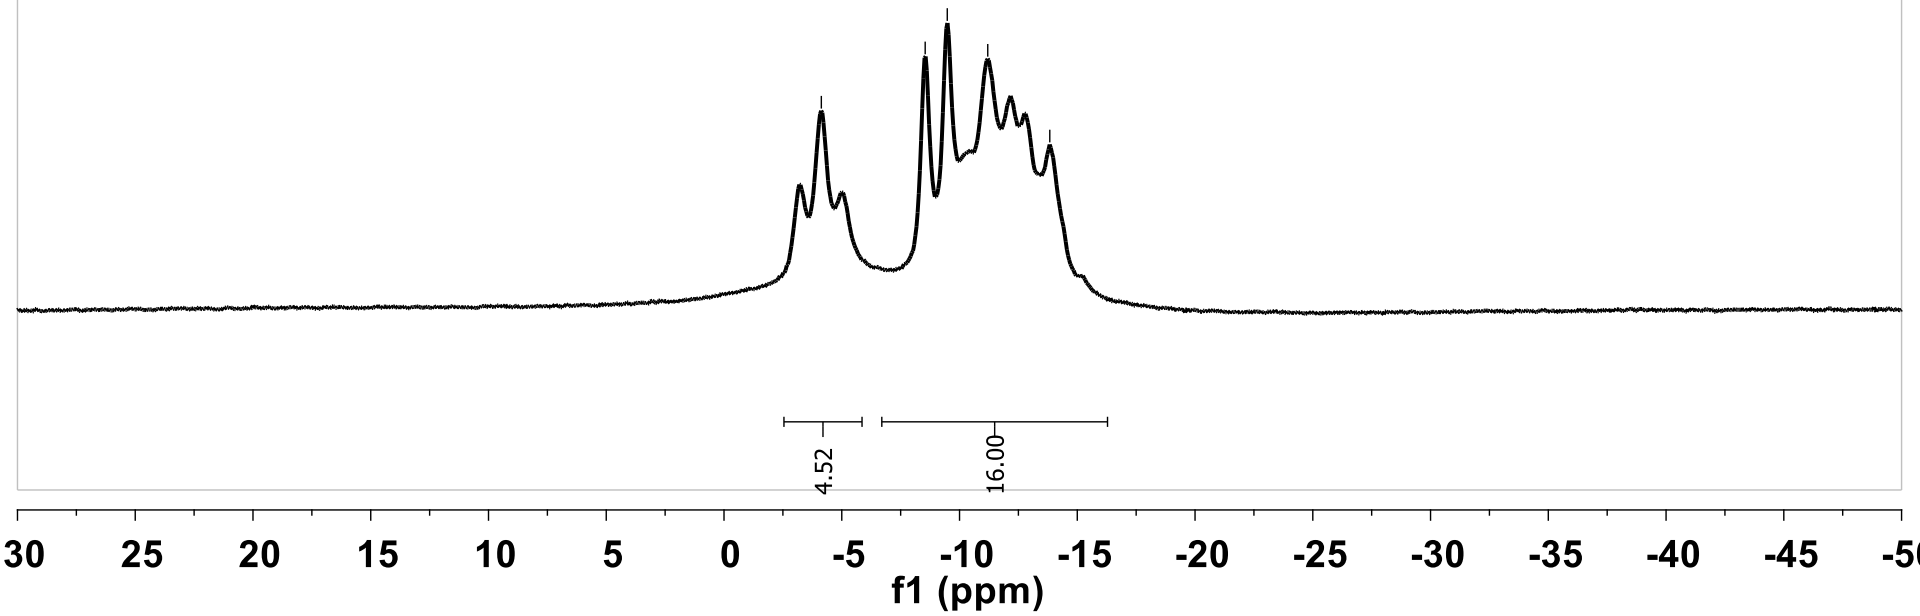

Sep06-2018-spokoyny  
Account No. AAS128  
KK-3-172 isolated, acetone-d6, 11B{1H}

~ -3.48  
~ -4.33  
~ -8.84  
~ -11.45  
~ -13.19

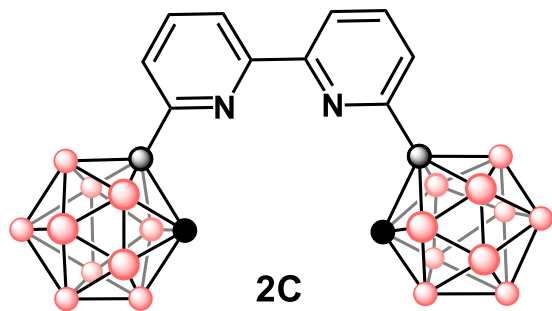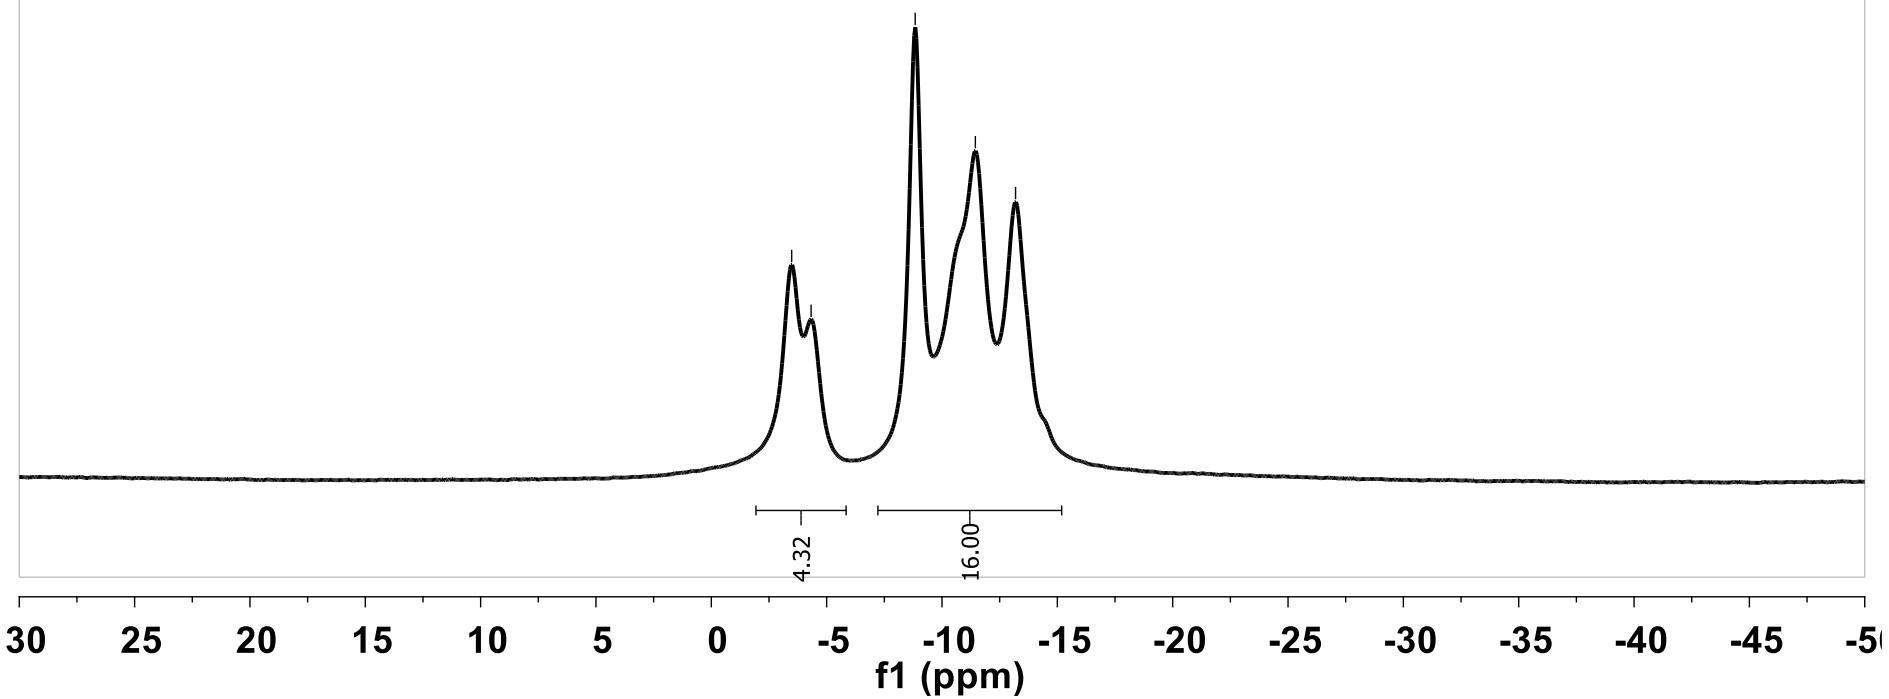

KK-3-172 <sup>13</sup>C  
<sup>13</sup>C

— 154.84

— 151.08

— 140.34

— 123.28

— 123.18

— 59.32

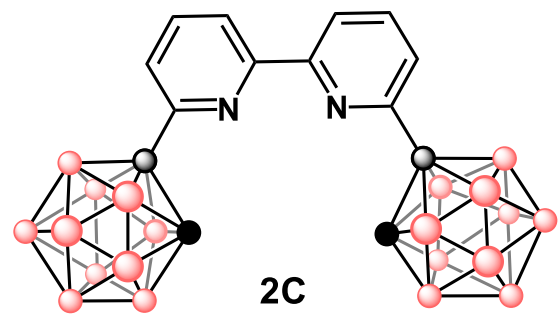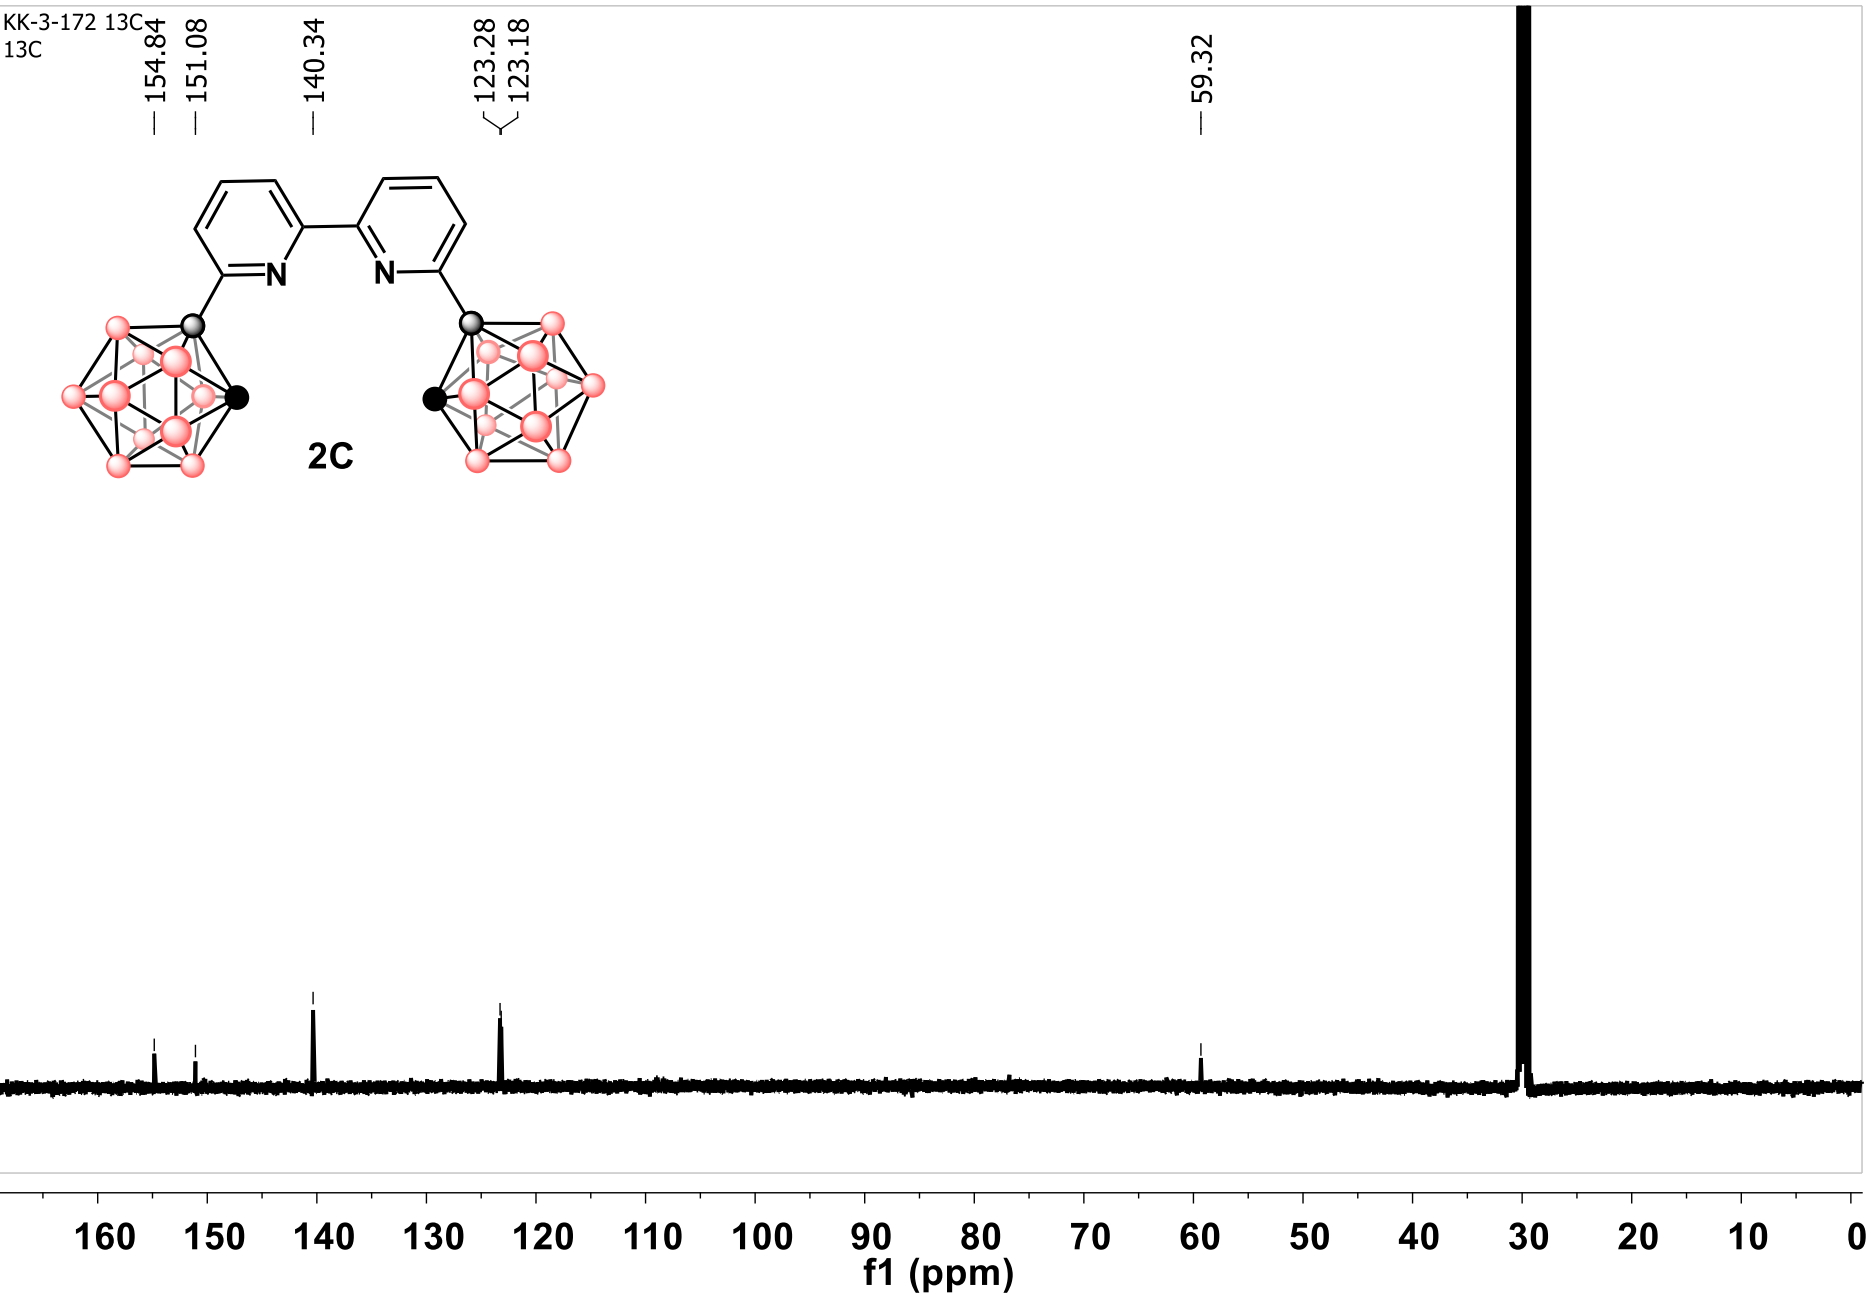

160 150 140 130 120 110 100 90 80 70 60 50 40 30 20 10 0

f1 (ppm)

Jul10-2018-spokoyny  
Account No. AAS153  
KA-I-130 purified CDCl3 1H

8.72  
8.70  
7.91  
7.89  
7.81  
7.79  
7.60  
7.53  
7.41

4.64

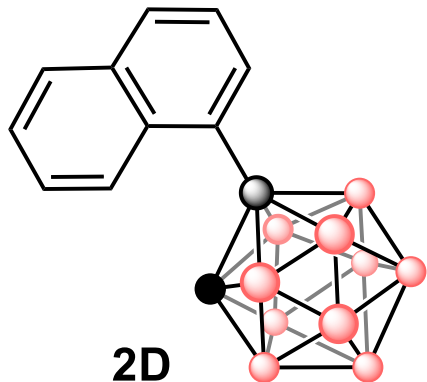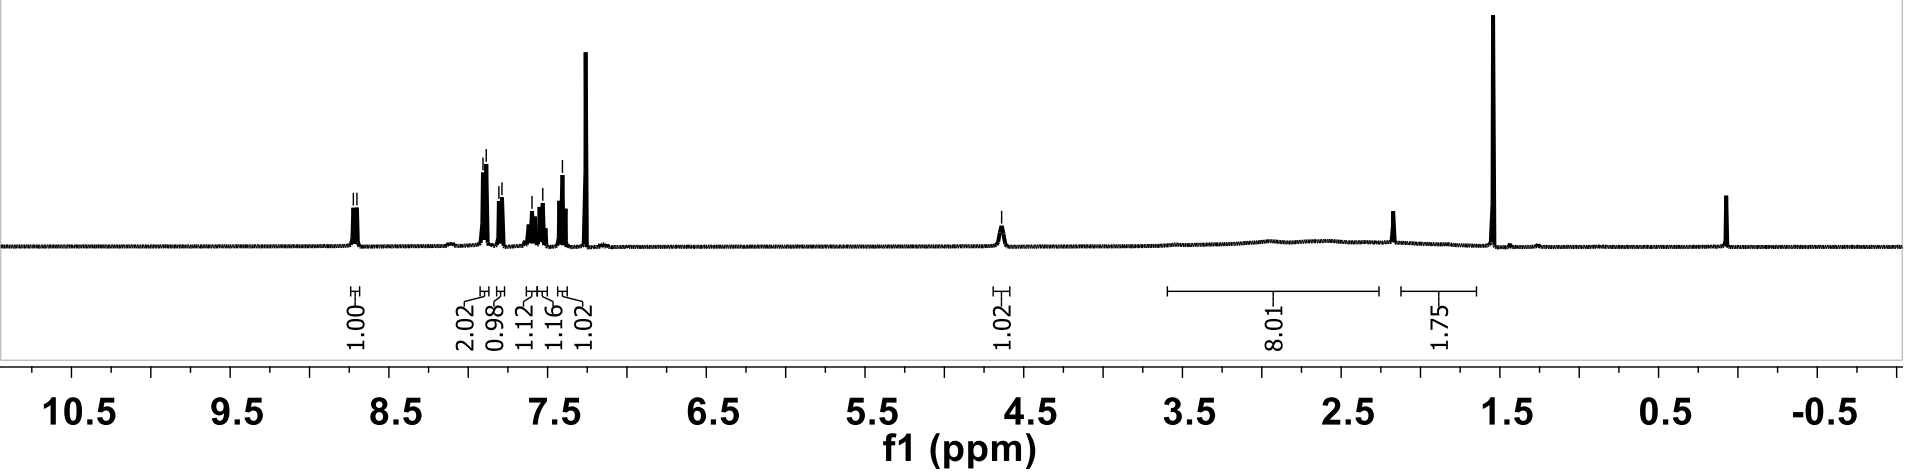

KA-I-130 11B CDCl3  
11B acquisition-no H decoupling

~ -2.33  
~ -3.25  
- -9.47  
~ -12.88  
~ -13.90

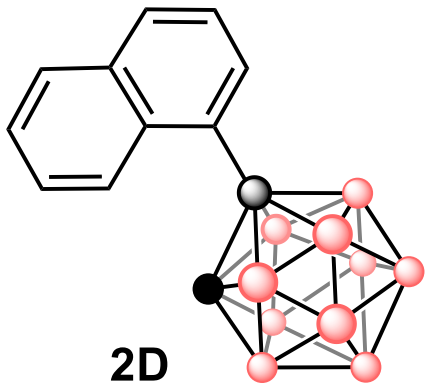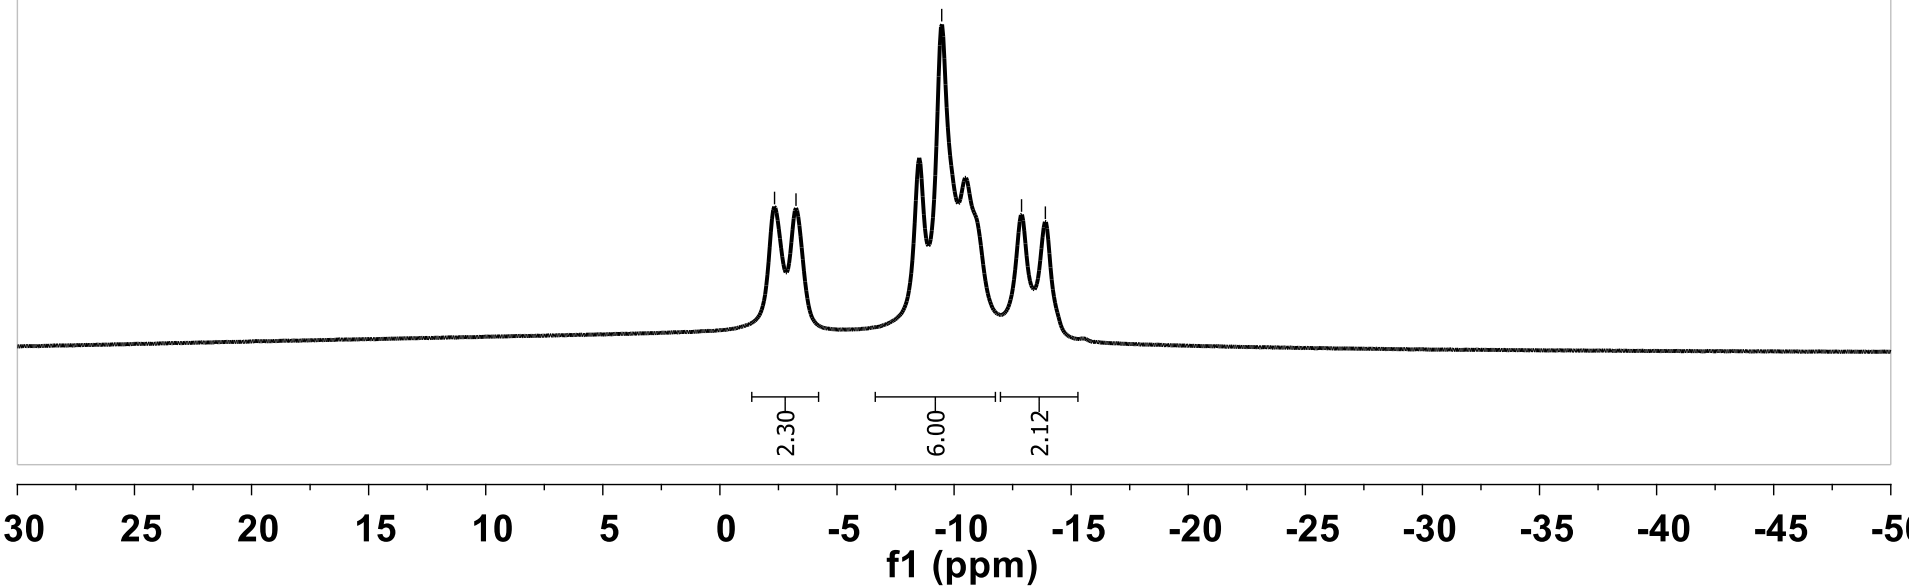

KA-I-130 11B{1H} CDCl3  
11B acquisition-with H decoupling

--- -2.36  
~ -8.54  
~ -9.58  
--- -12.94

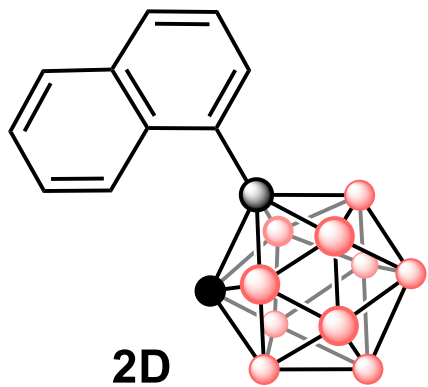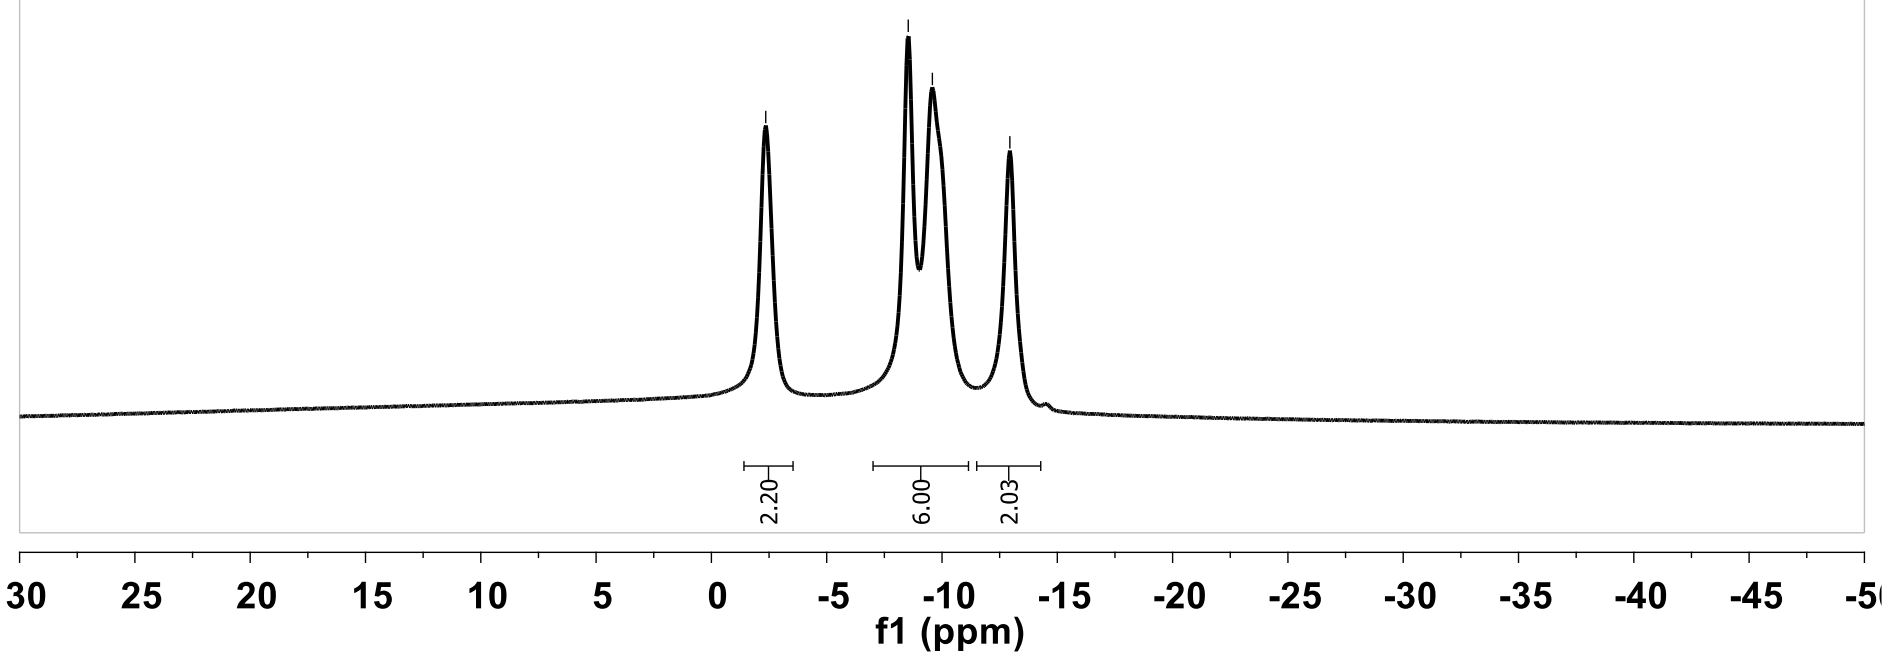

KA-I-130 13C  
13C

- 134.91
- 131.88
- 130.02
- 129.93
- 128.82
- 128.34
- 127.34
- 126.25
- 124.65
- 124.52

— 61.28

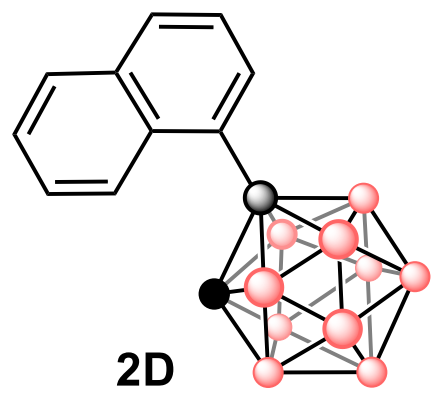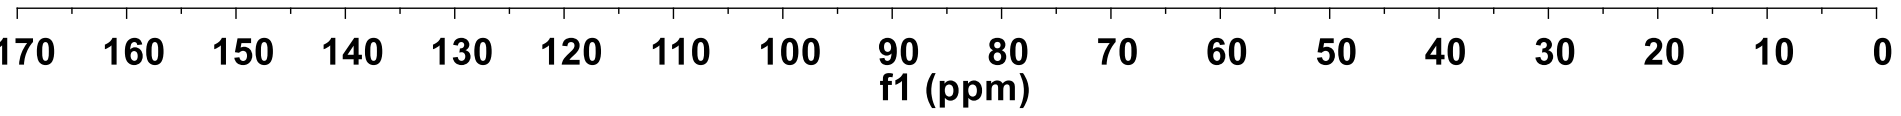



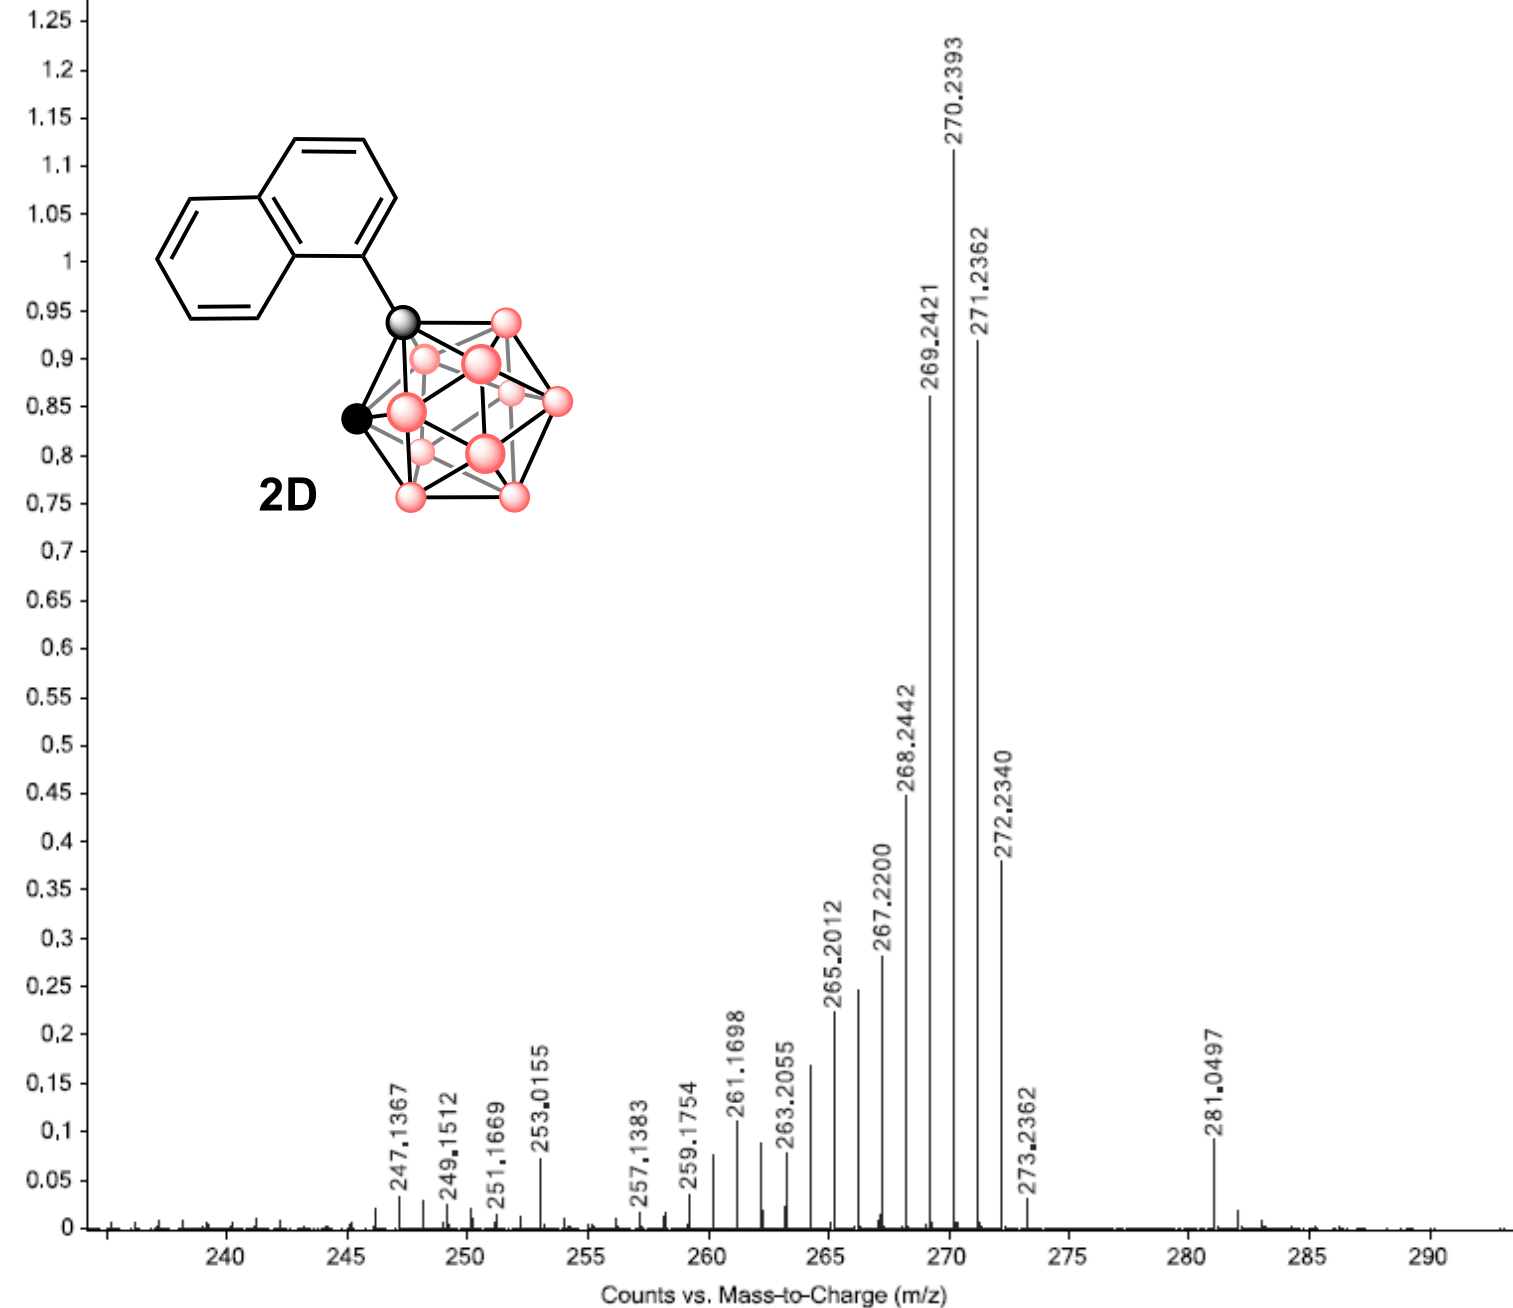

Sep12-2018-spokoyny  
Account No. AA91597  
KA-I-162 CDCl3

8.18  
8.16  
8.09  
8.07  
7.99  
7.98  
7.79  
7.77  
7.49  
7.48

4.09

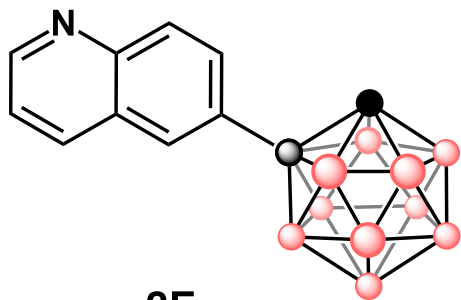

2E

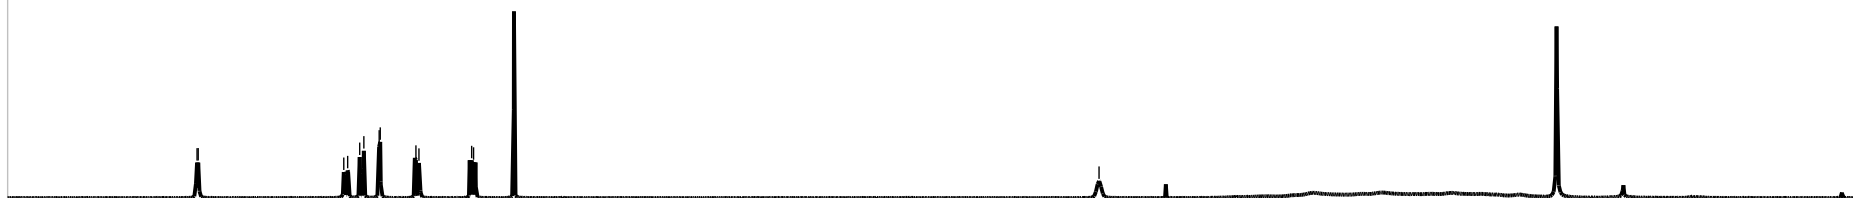

0.94

1.00

0.98

0.97

1.00

1.00

1.00

10.15

9.5 9.0 8.5 8.0 7.5 7.0 6.5 6.0 5.5 5.0 4.5 4.0 3.5 3.0 2.5 2.0 1.5 1.0 0.5 0.0

f1 (ppm)

KA-I-162 11B CDCl3  
11B acquisition-with H decoupling

~ -1.12  
~ -2.05  
~ -3.27  
~ -4.16  
~ -7.97  
~ -8.91  
~ -10.79  
~ -11.59

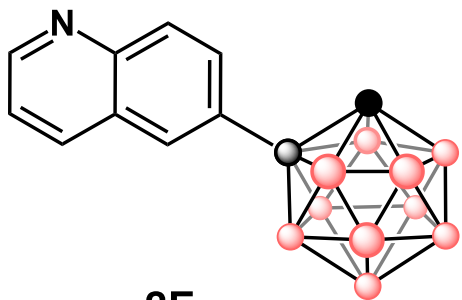

**2E**

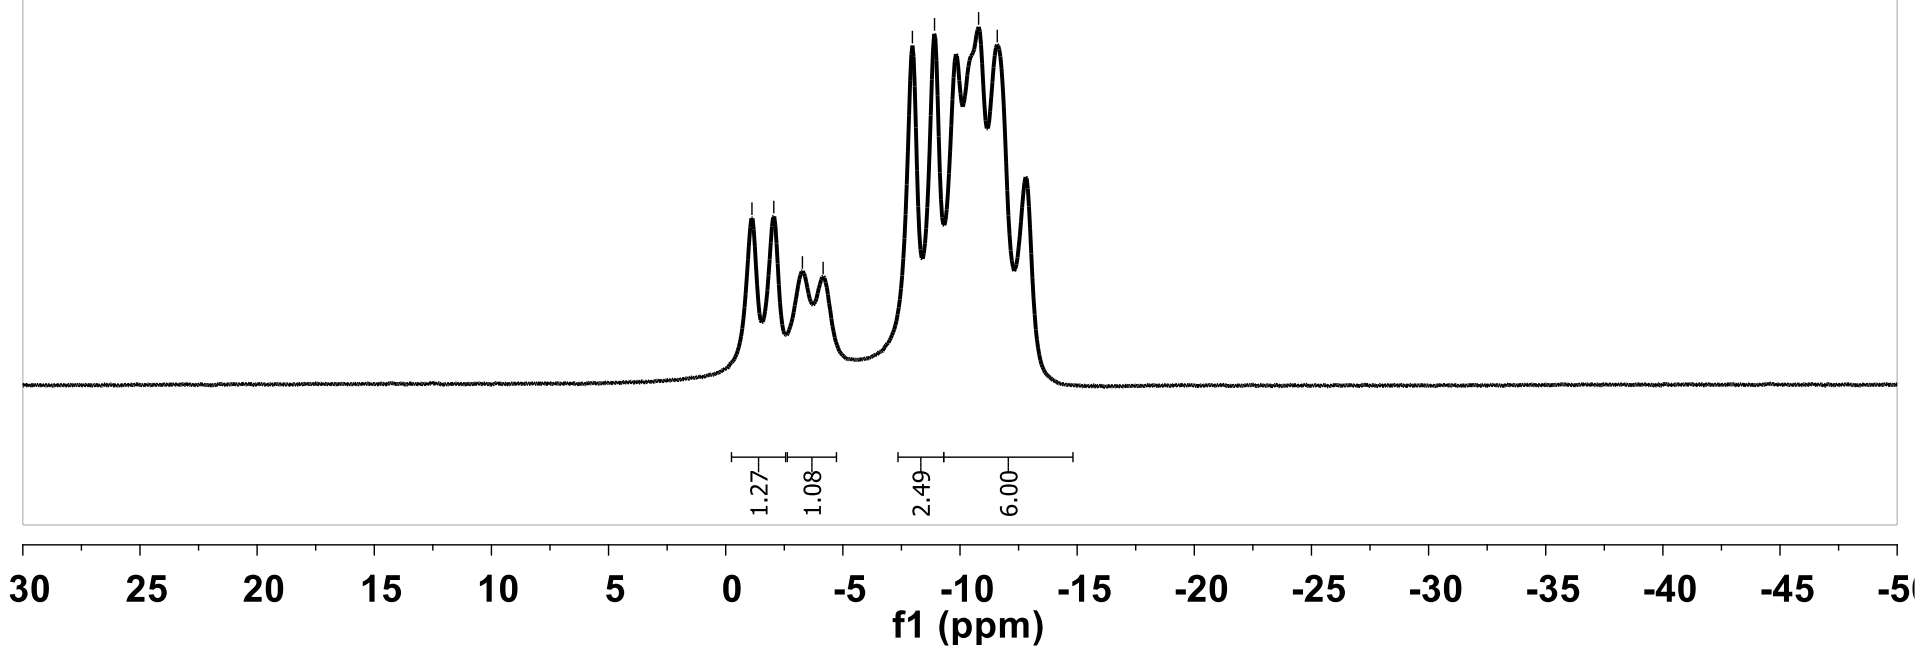

KA-I-162 11B{1H} CDCl3  
11B acquisition-with H decoupling

-- -1.59  
-- -3.72  
~ -8.44  
- -10.34  
/ -12.31



**2E**

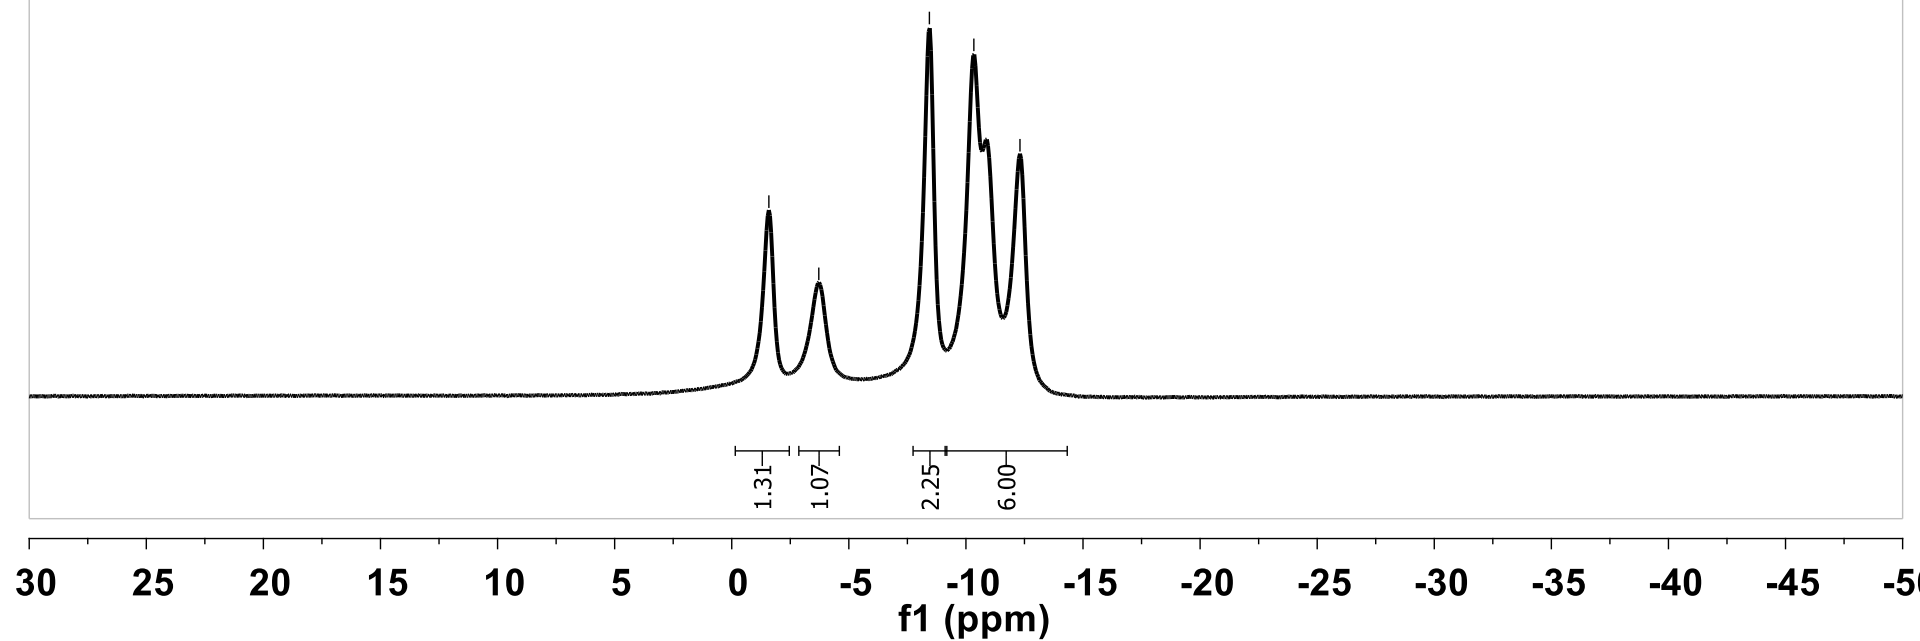

KA-I-162 13C  
13C

— 152.30  
— 148.20  
— 136.63  
— 131.62  
— 130.48  
— 128.01  
— 127.80  
— 127.60  
— 122.55

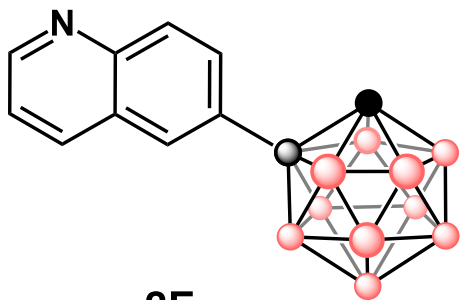

**2E**

— 76.05

— 60.44

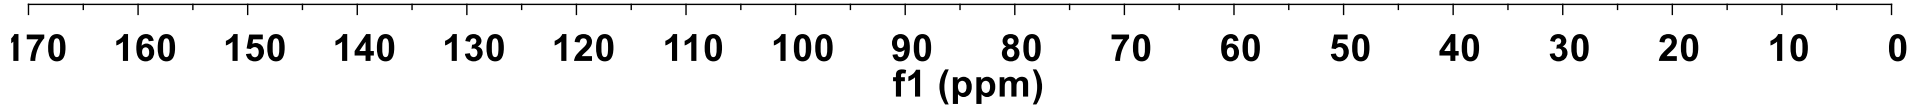

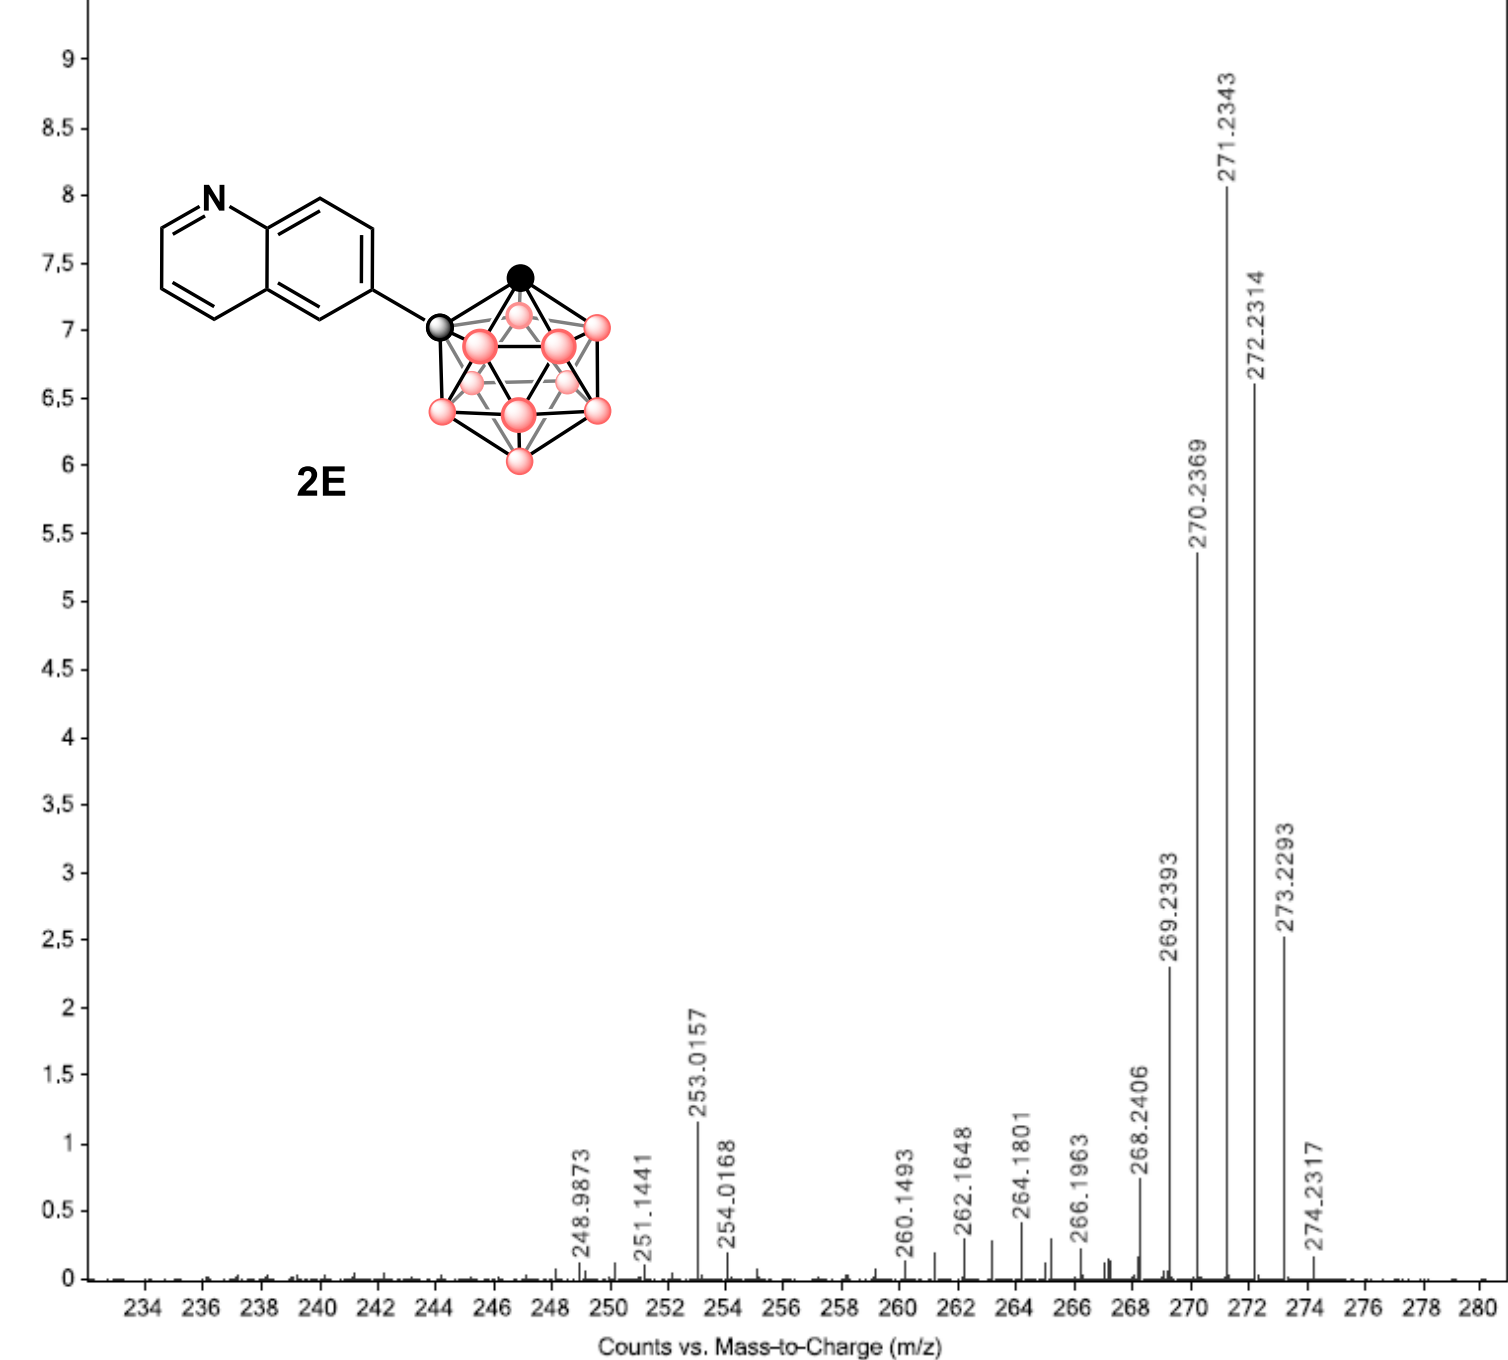

Sep19-2018-spokoyny  
Account No. AAS153  
di-ocb-pyridine CDCl3 1H

7.77  
7.62  
7.60

4.48

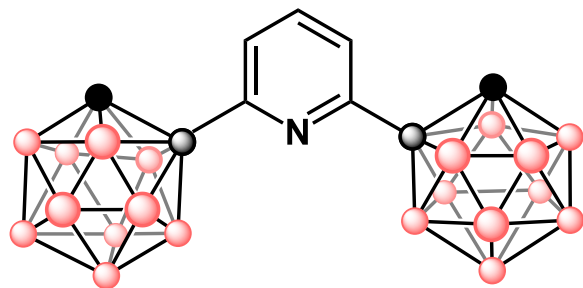

2F

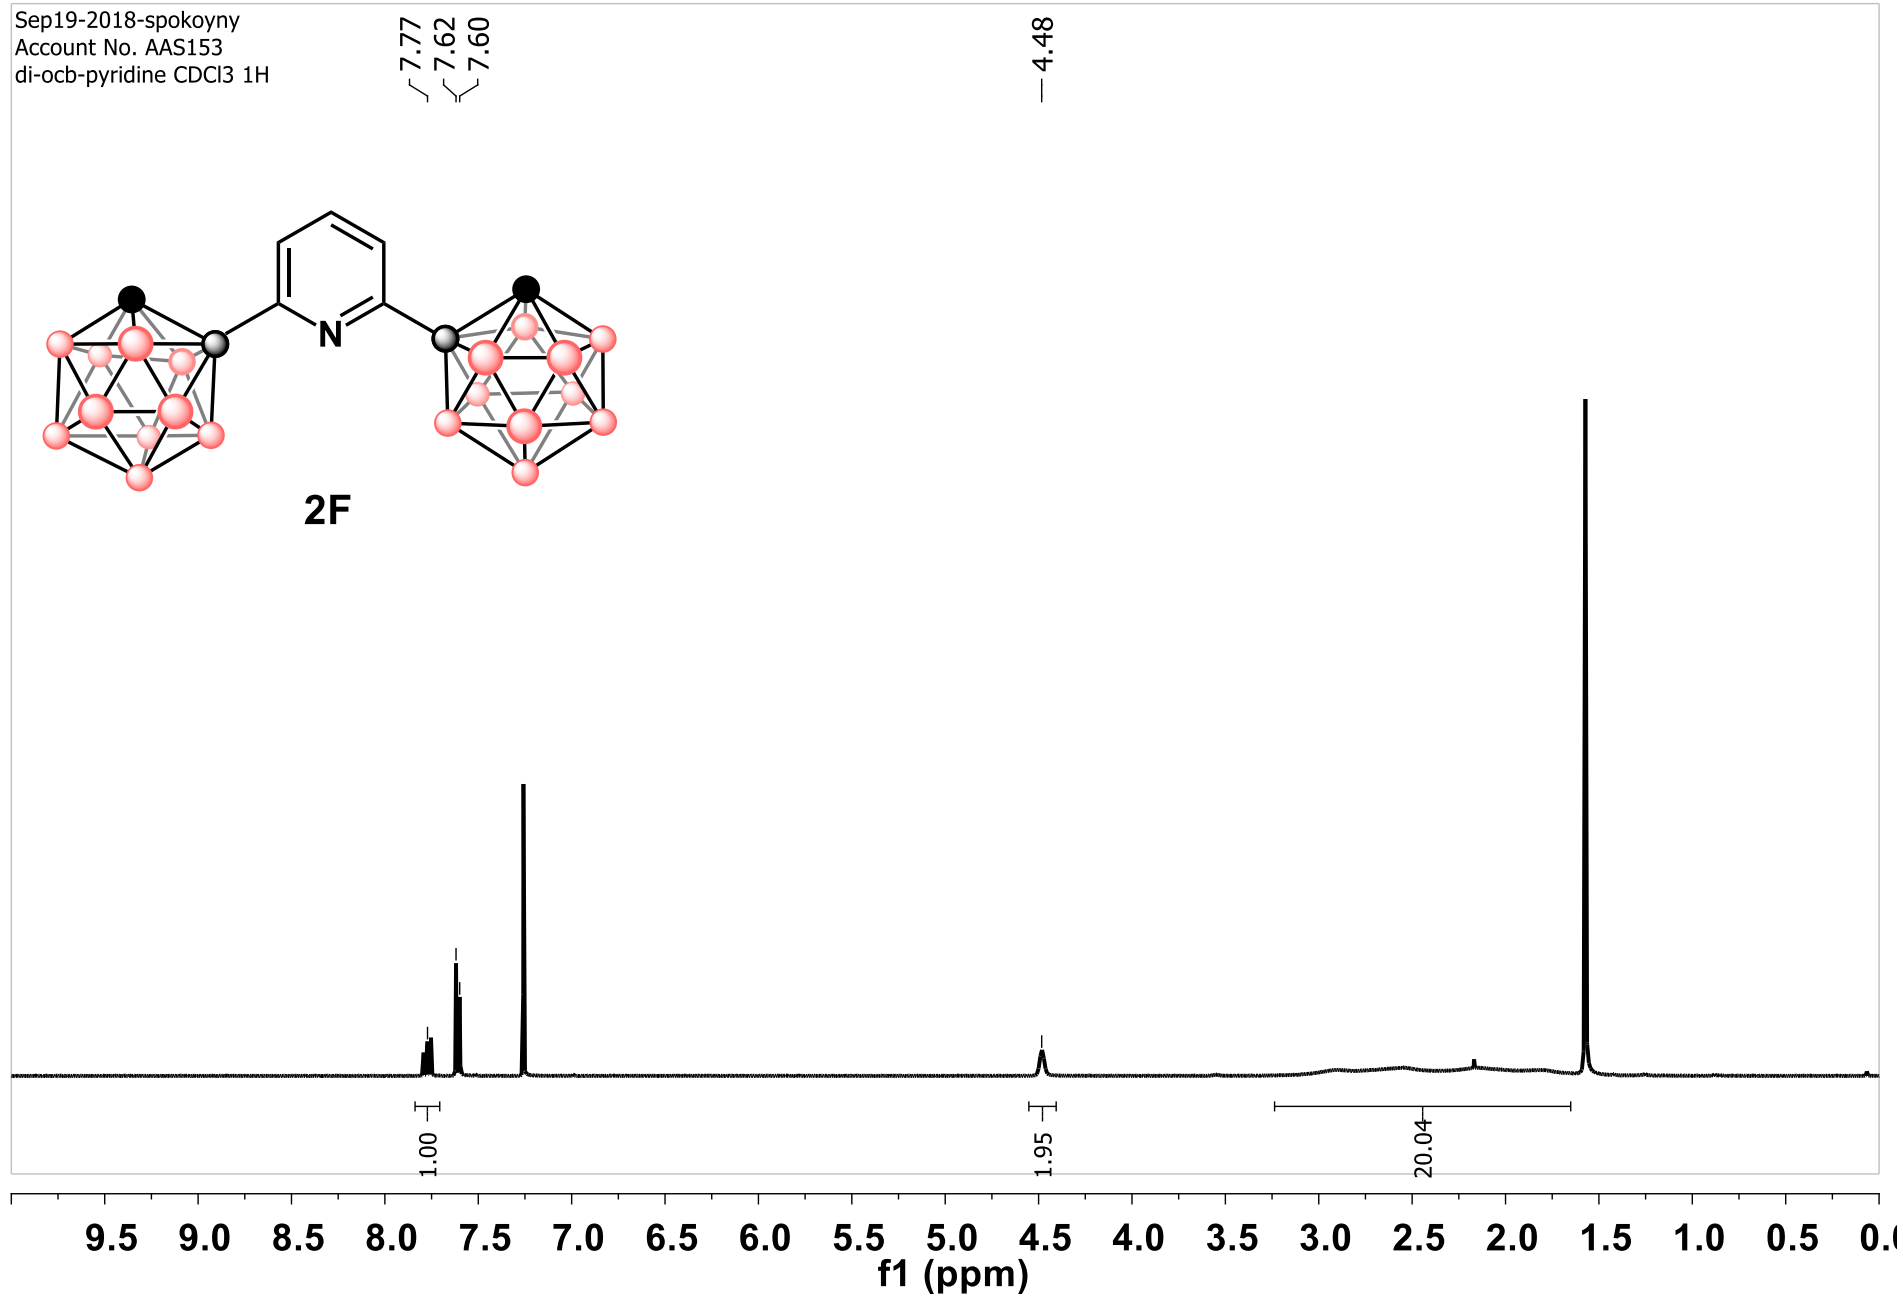

KA-I-160 11B CDCl3  
11B acquisition-no H decoupling

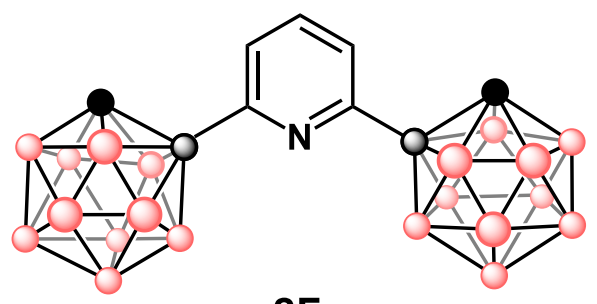

2F

— -2.80  
~ -7.60  
~ -8.54  
— -11.67

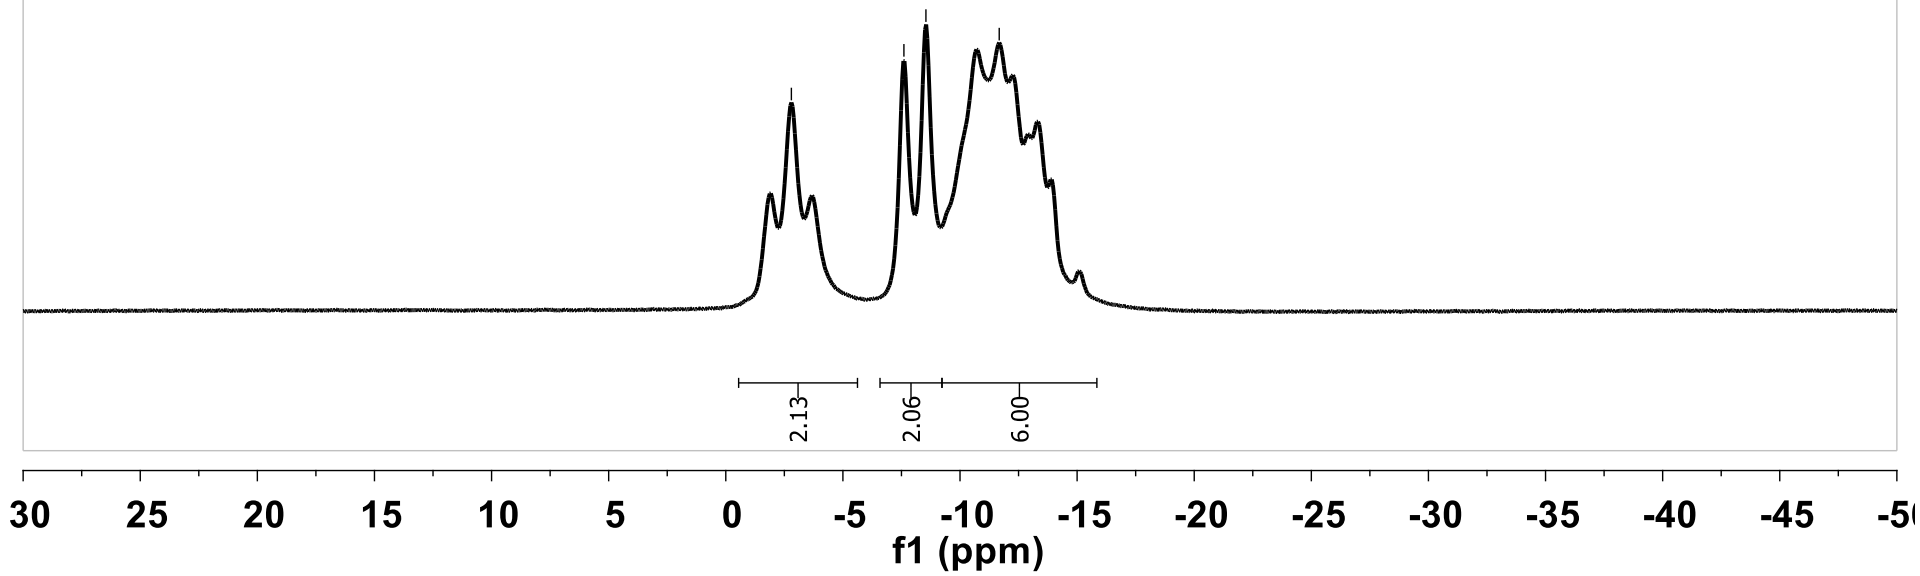



KA-I-160 11B{1H} CDCl3  
11B acquisition-no H decoupling

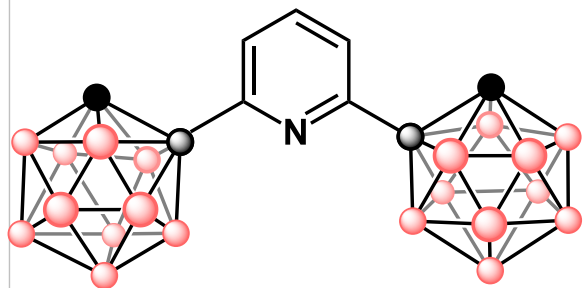

**2F**

~ -2.36  
~ -3.22  
- -8.07  
- -11.14  
- -12.82

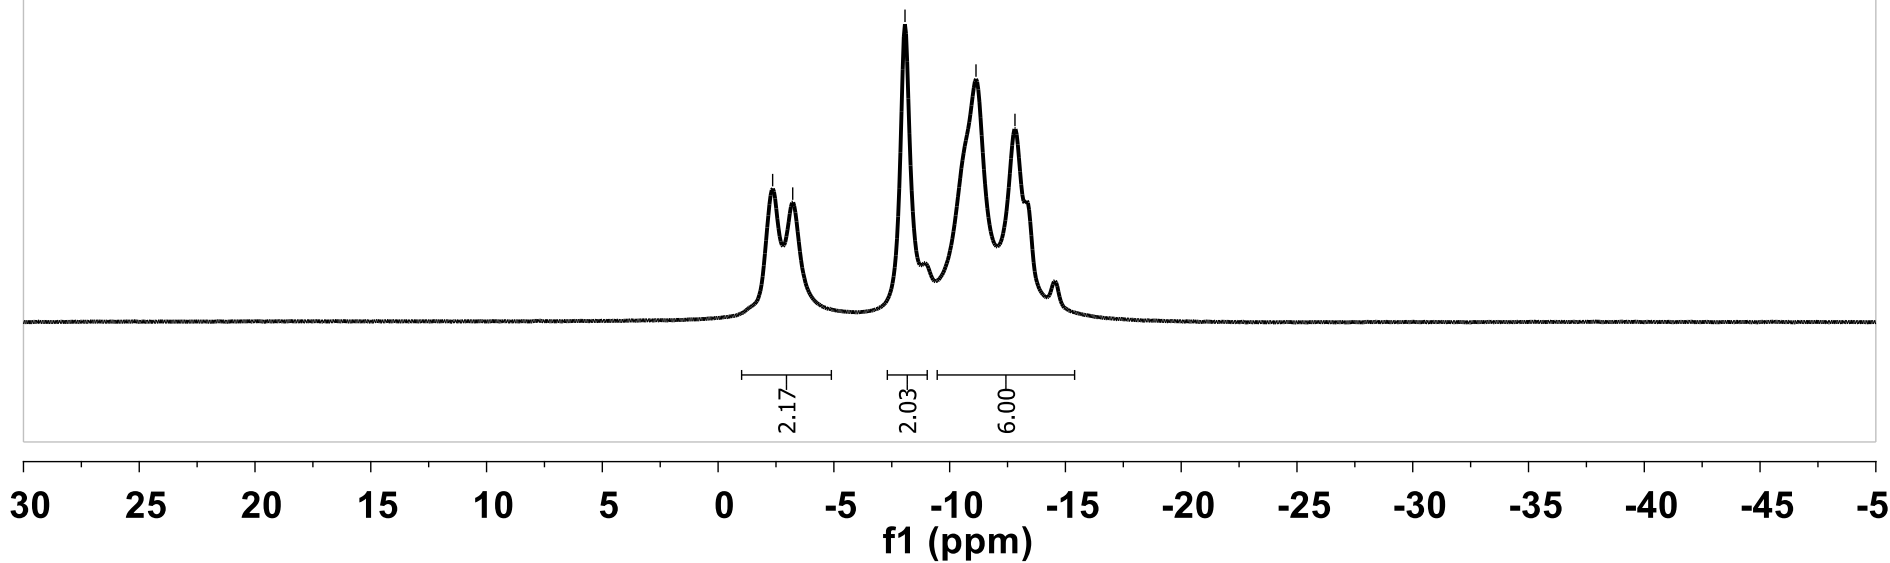

KA-I-160 13C  
13C

— 150.62

— 139.36

— 122.91

— 74.13

— 56.73

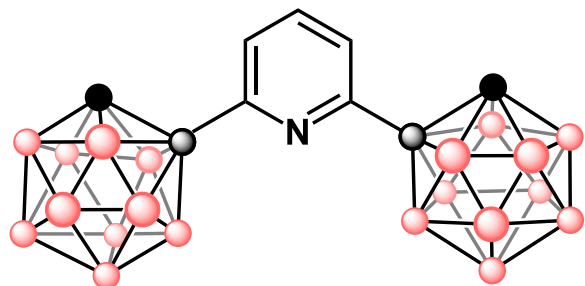

2F

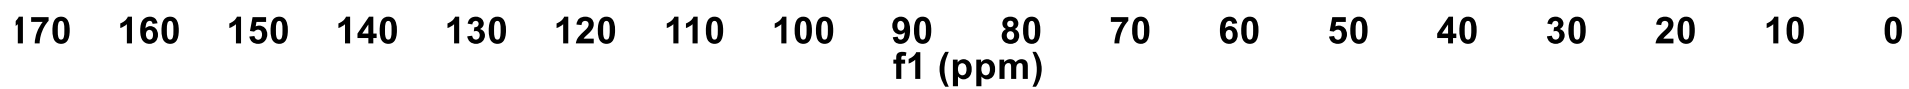

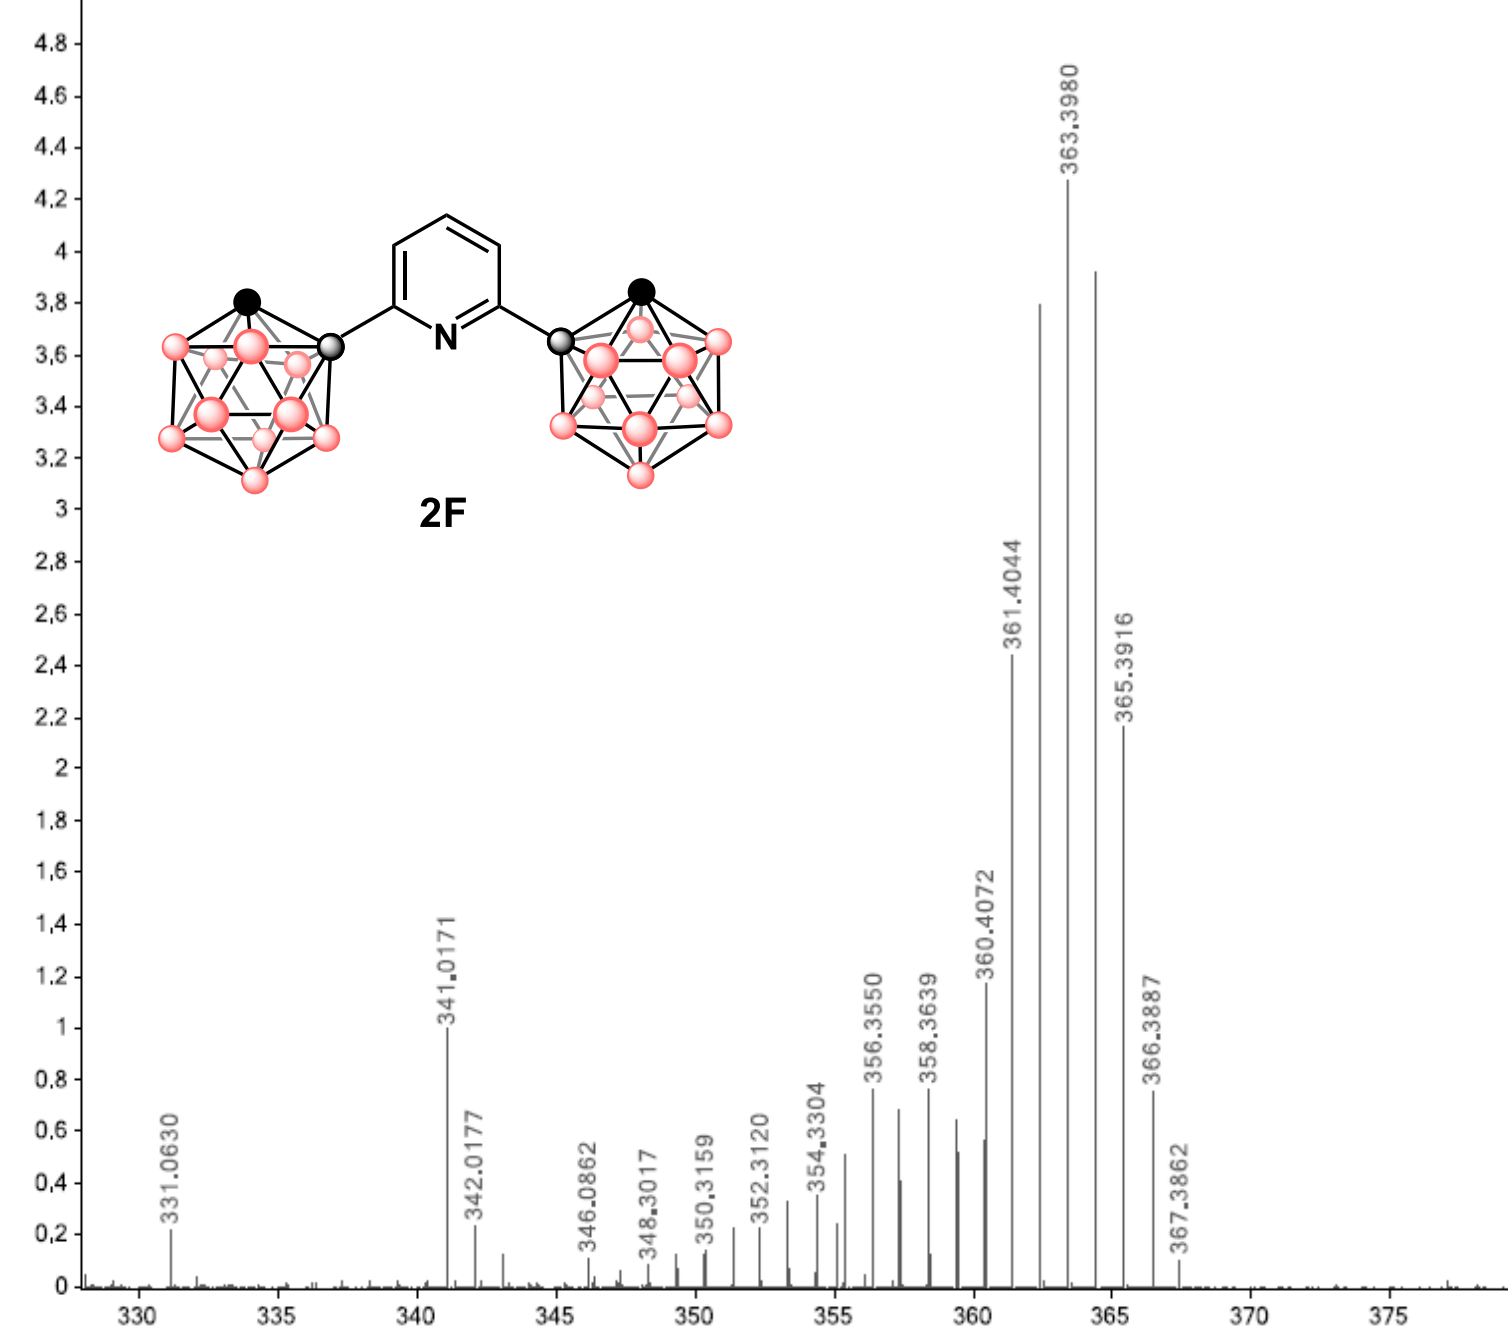

Counts vs. Mass-to-Charge ( $m/z$ )

Sep12-2018-spokoyny  
Account No. AAS153  
KA-I-170 CDCl 1H

8.51  
8.50

7.62  
7.62  
7.48  
7.46  
7.24  
7.23

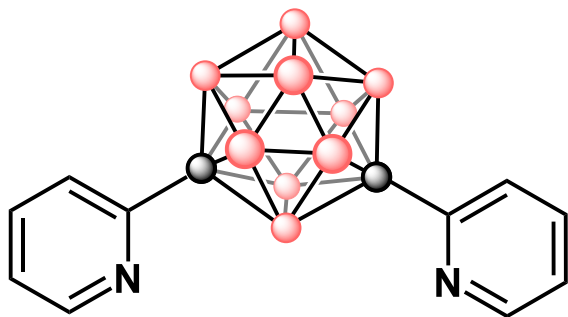

**2G**

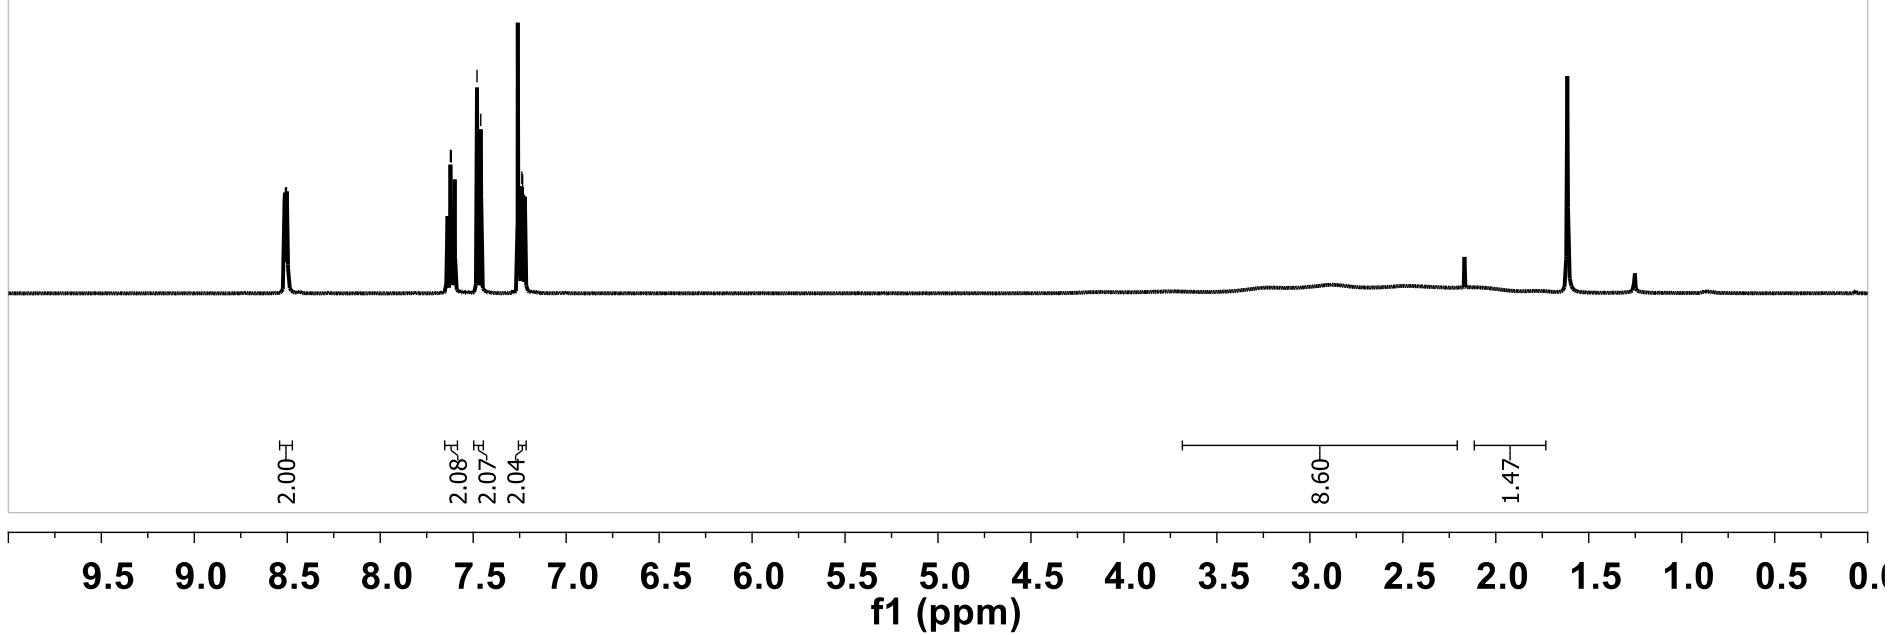



KA-I-170  $^{11}\text{B}\{^1\text{H}\}$   $\text{CDCl}_3$   
11B acqui: n-no H decoupling

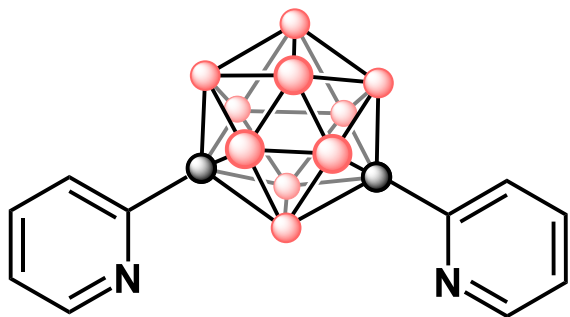

**2G**

— -5.37  
— -10.32  
— -12.78

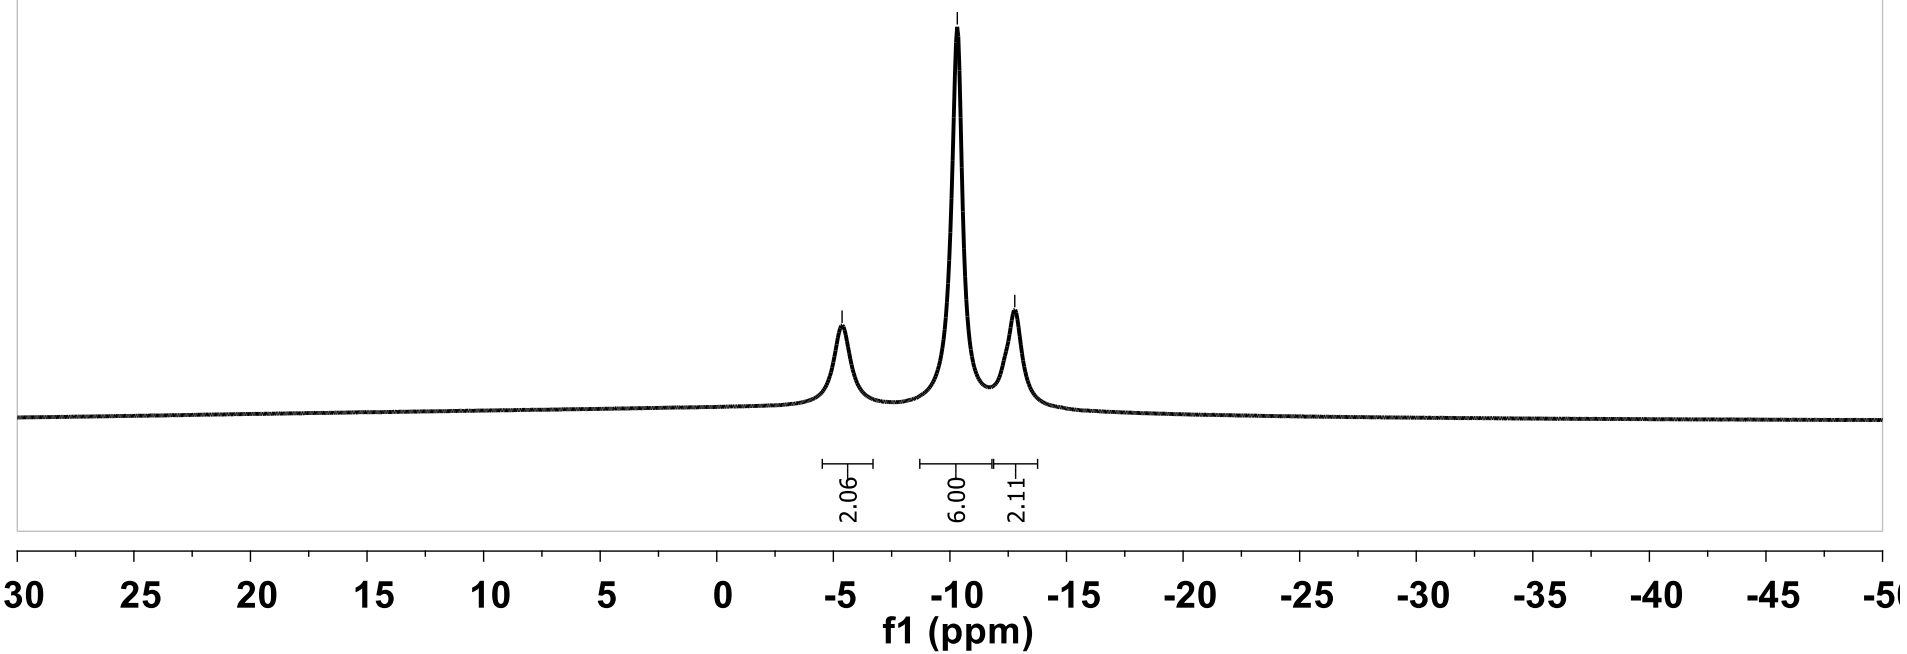

KA-I-170 <sup>13</sup>C  
<sup>13</sup>C

— 152.89  
— 149.02

— 136.94

~ 123.67  
~ 122.13

— 78.86

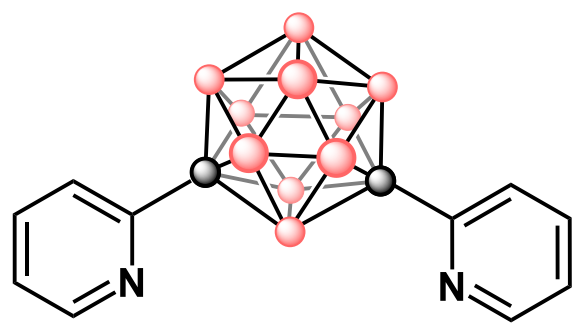

**2G**

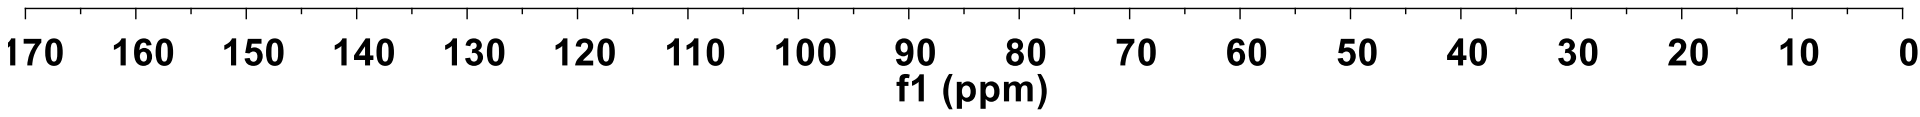

+EI Scan (rt: 5,000 min) Frag=70,0V 18\_0907\_KA-I-170\_2,D

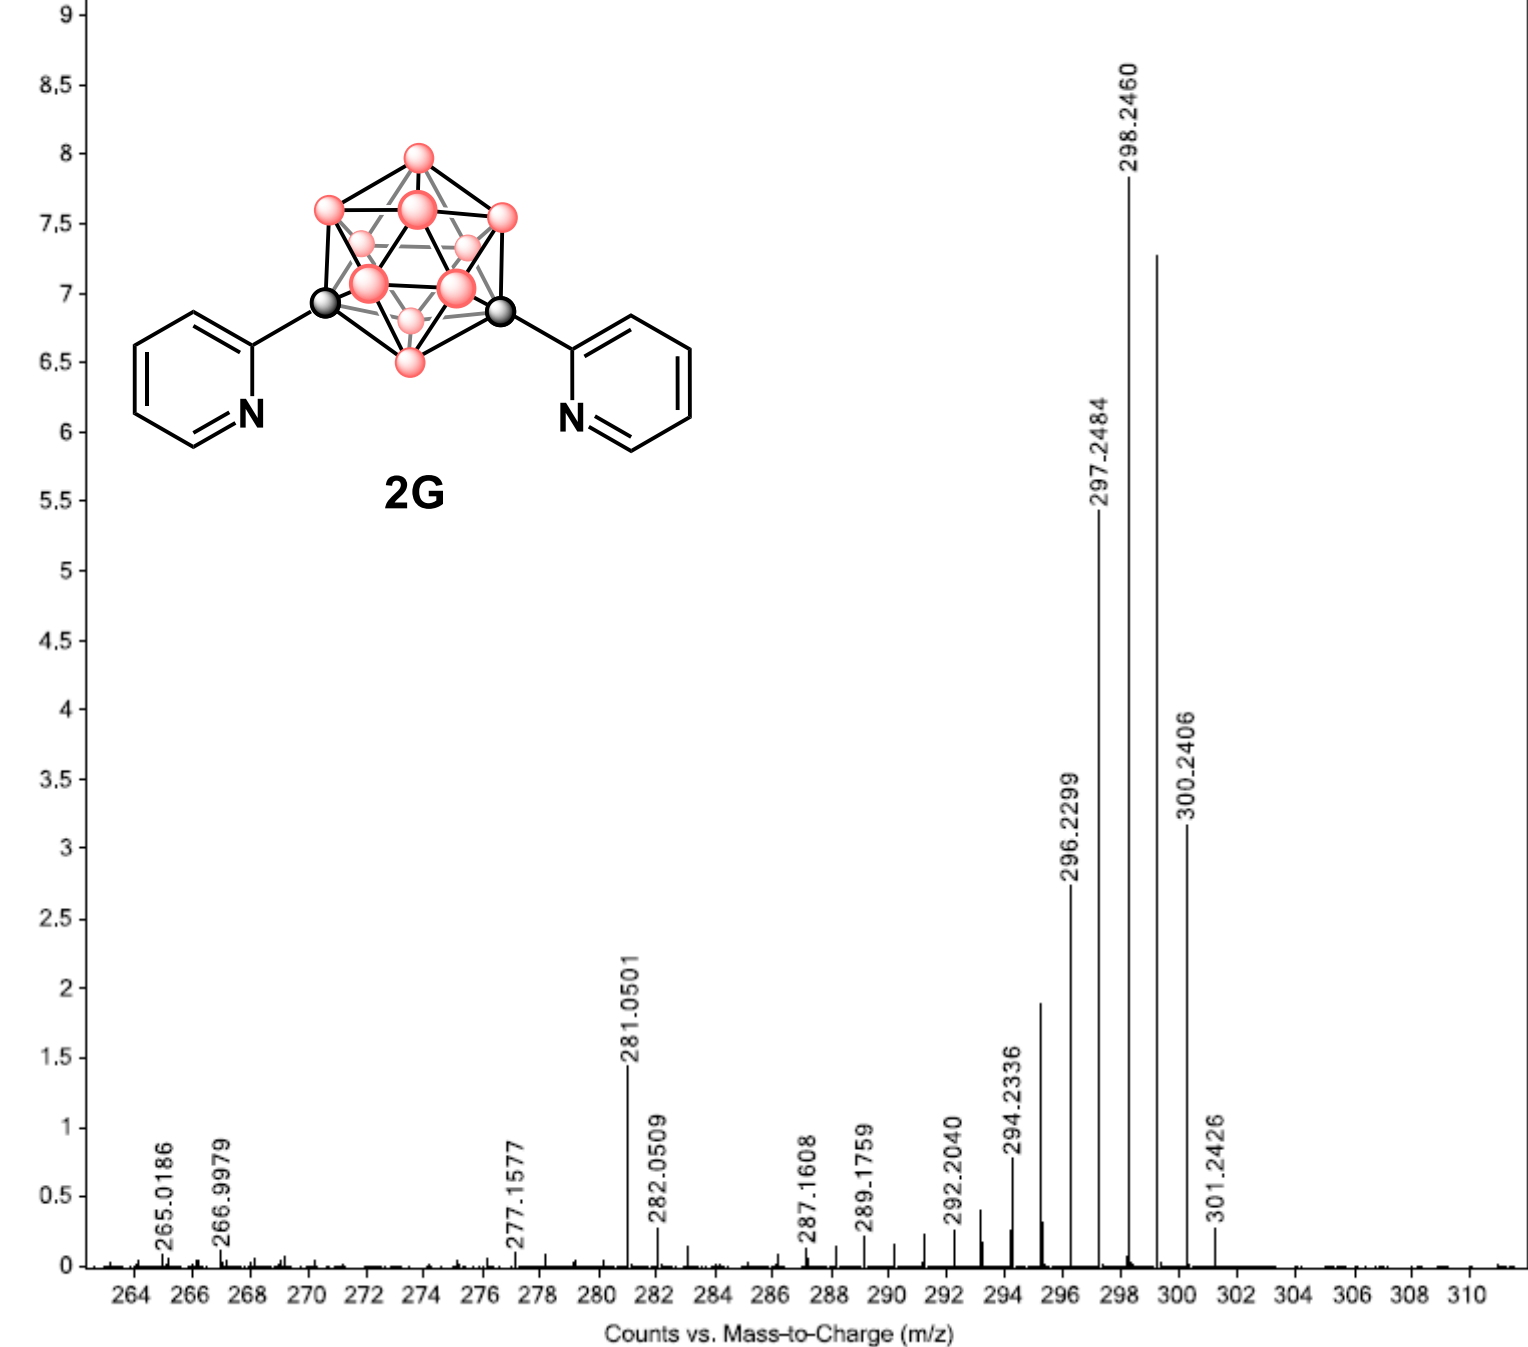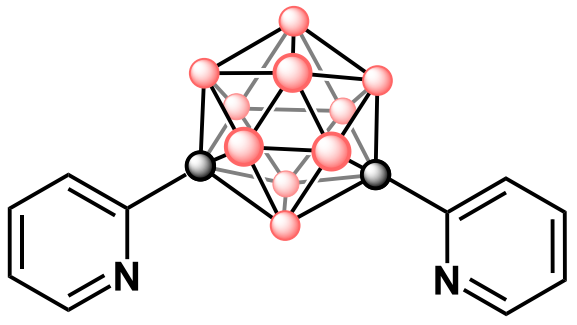

**2G**



7.97  
7.96  
7.68  
7.67  
7.21  
7.20

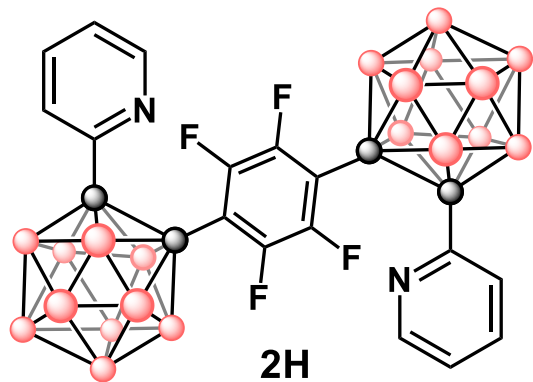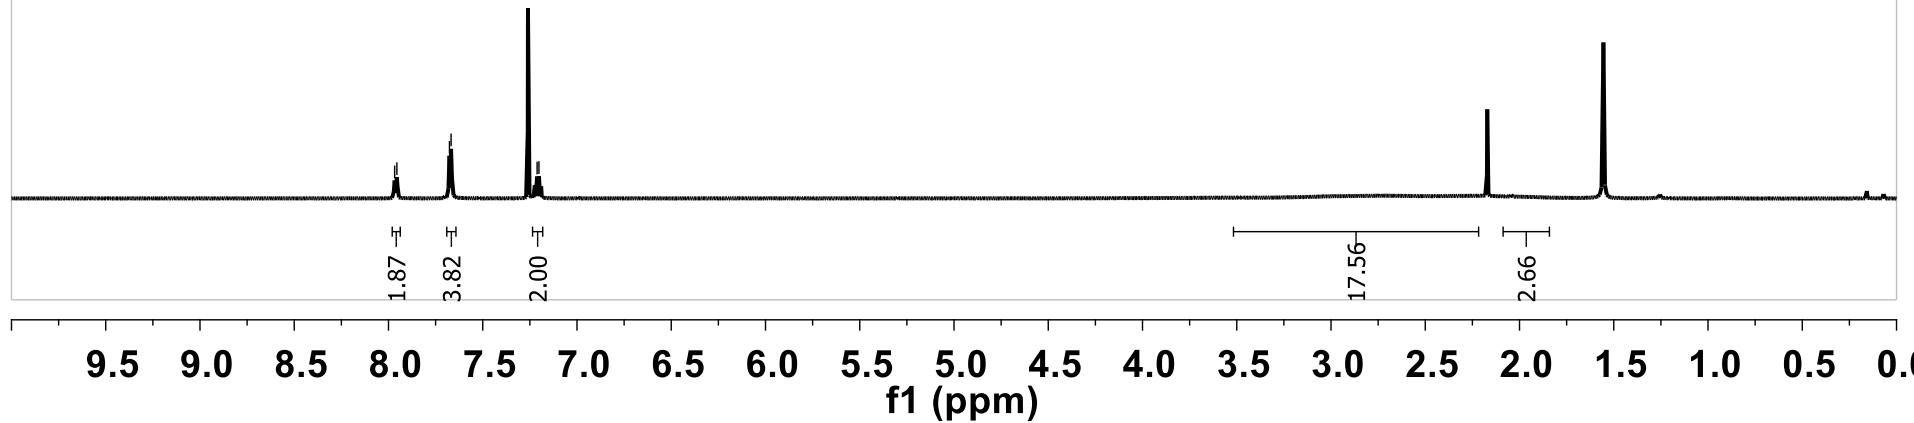

KA-I-145 11B CDCl3  
11B acquisition-with H decoupling

~ 0.70  
~ -0.09  
~ -2.36  
~ -3.25  
- - 8.98

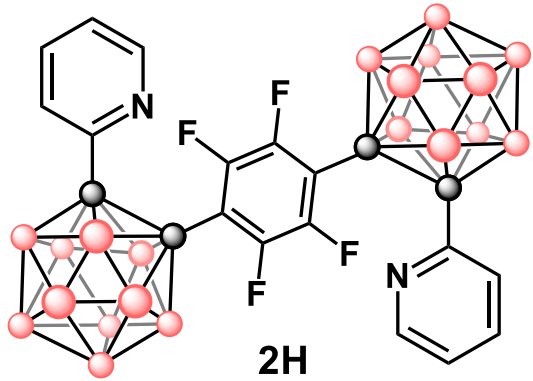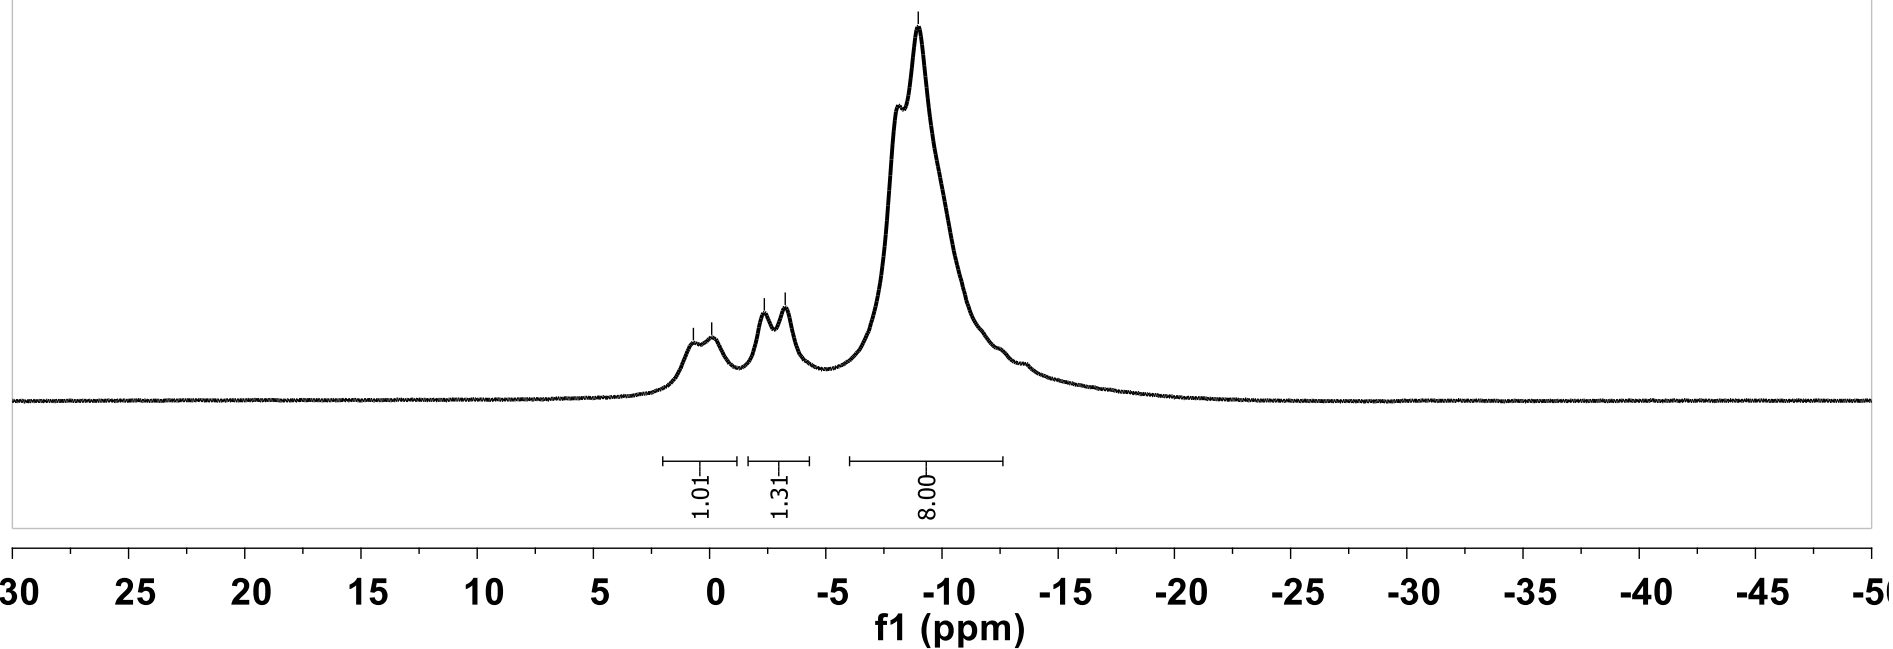

KA-I-145 11B{1H} CDCl3  
11B acquisition-with H decoupling

— 0.36  
-- -2.76  
— -8.48

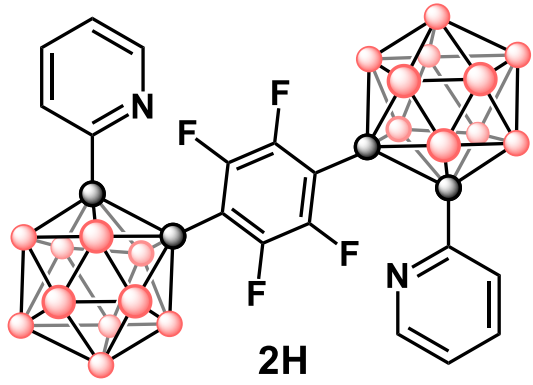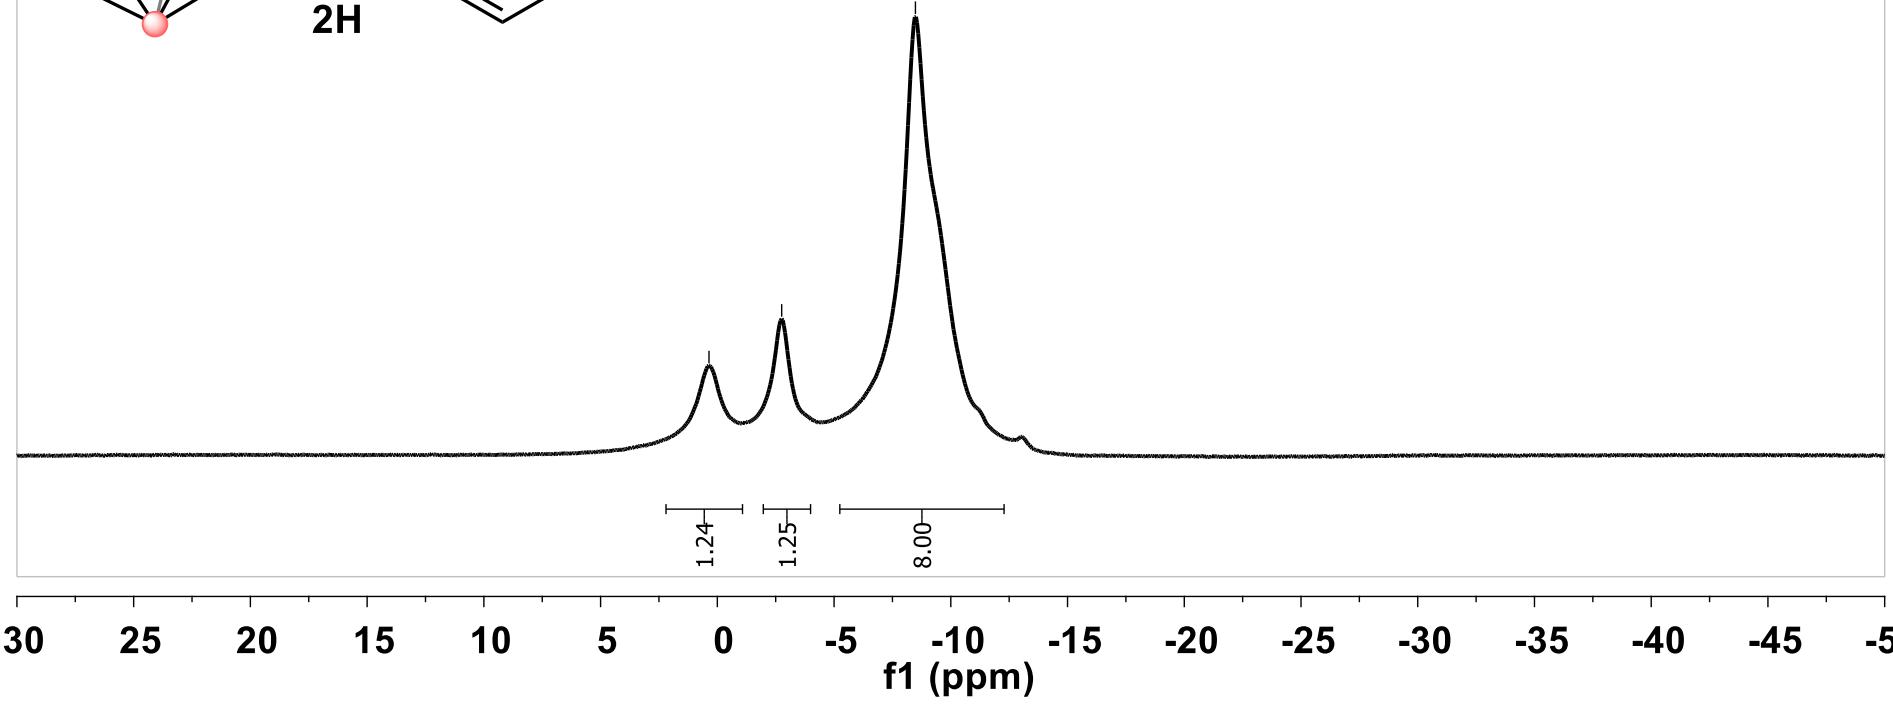

KA-I-145 13C  
13C

150.08

148.38

137.44

124.51

124.05

83.77

71.95

31.09

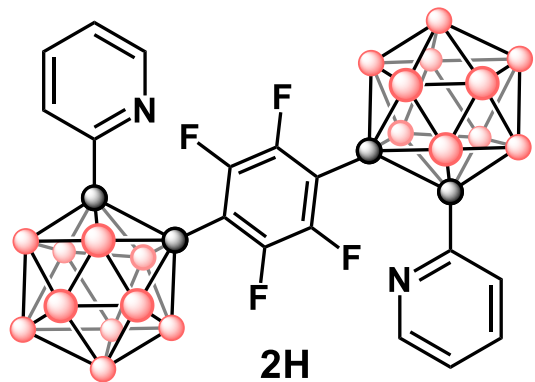

2H

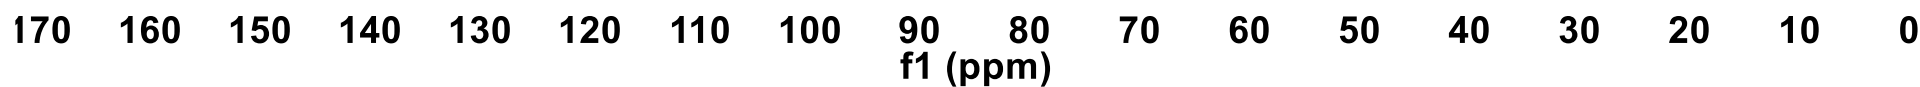

Jul30-2018-spokoyny  
Account No. AAS153  
KA-I-145 pure CDCl3 19F

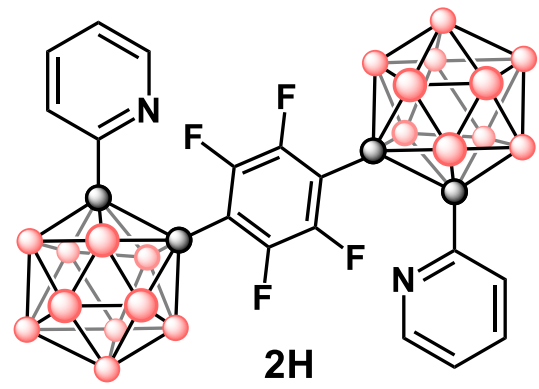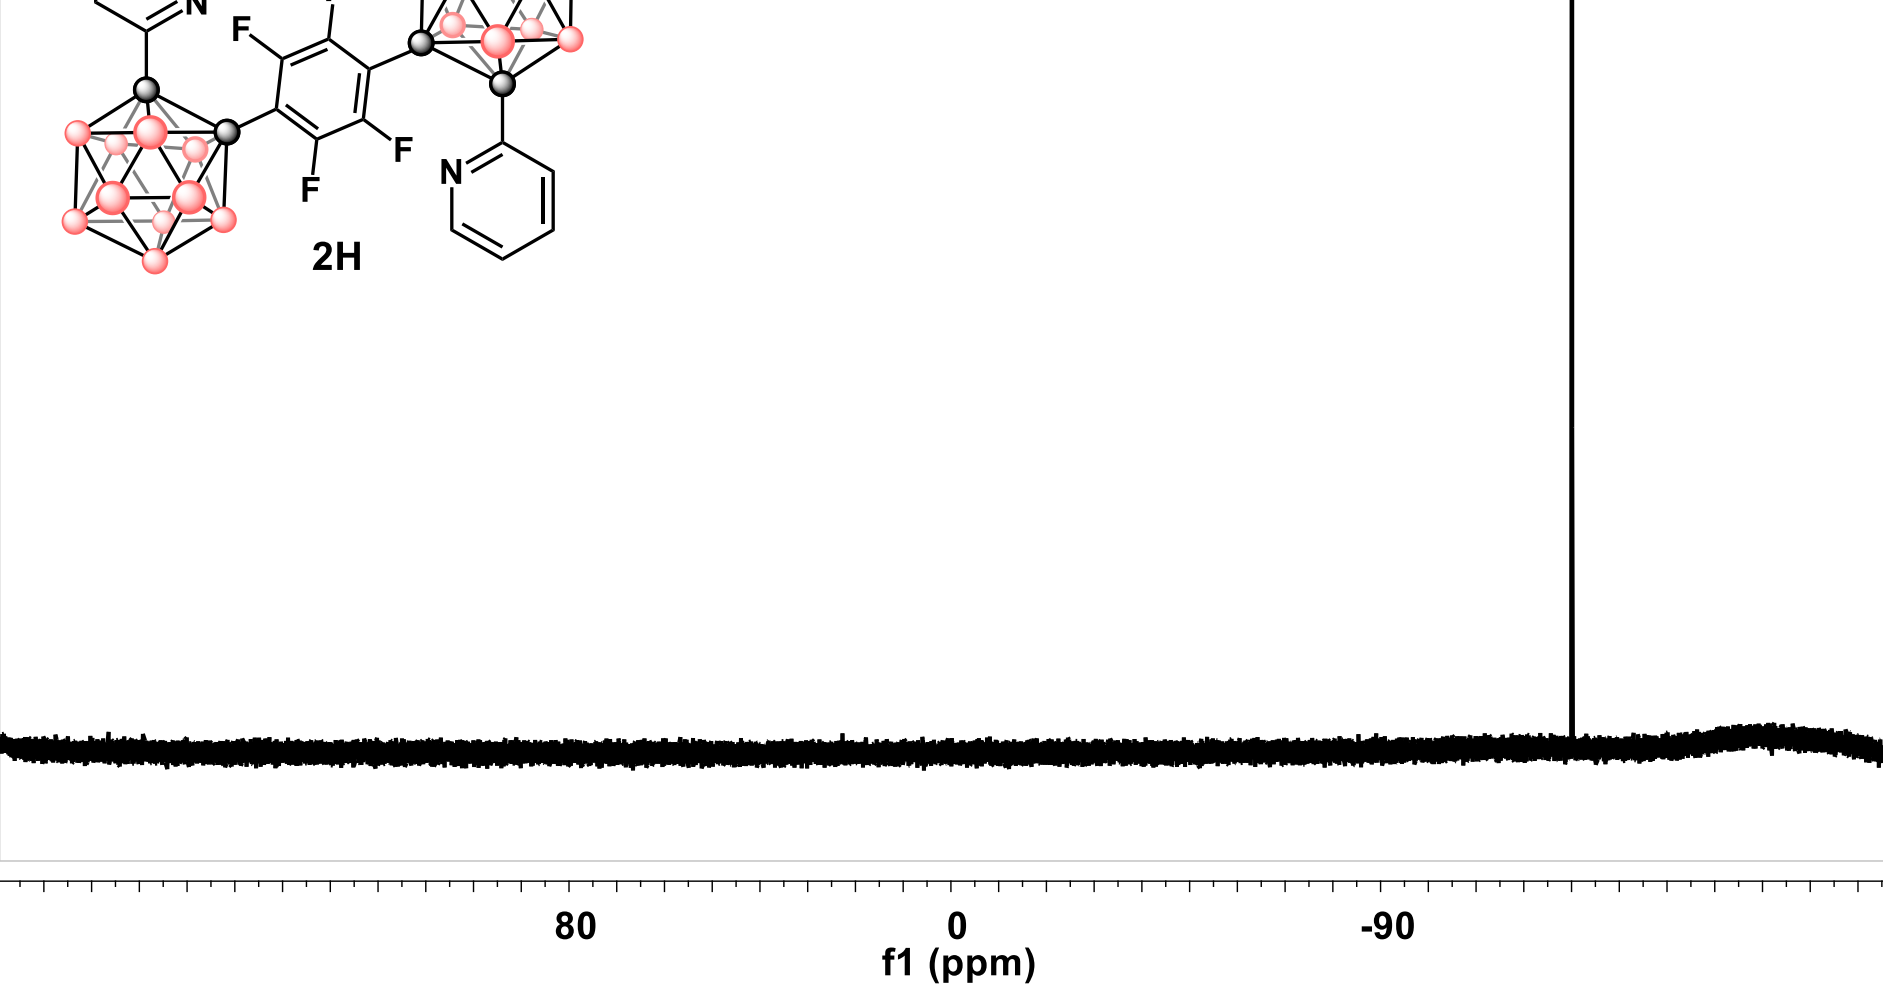

Oct04-2018-spokoyny  
Account No. AAS153  
KA-I-178 pure CDCl3 1H

8.22  
8.21  
7.65  
7.65  
7.54  
7.11  
7.11

0.35

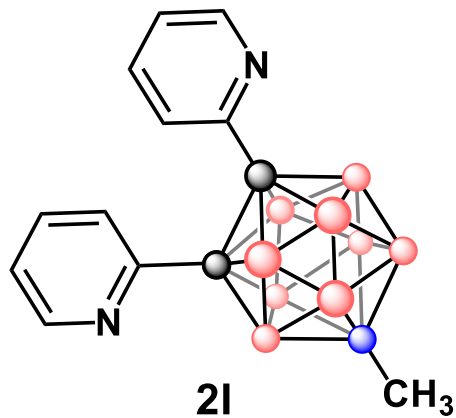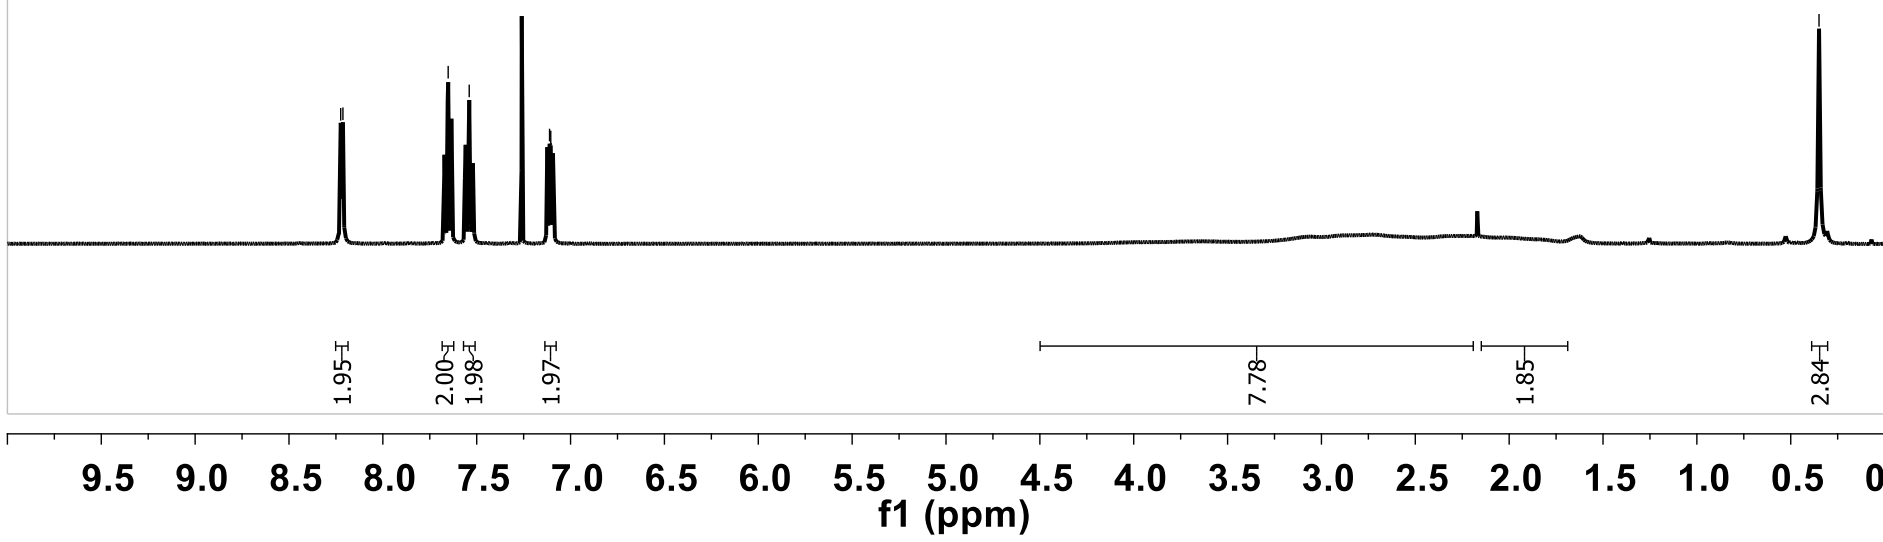

KA-I-178 11B  
11B acquisition-no H decoupling

— 7.60

~ -1.05

~ -1.95

— -9.72

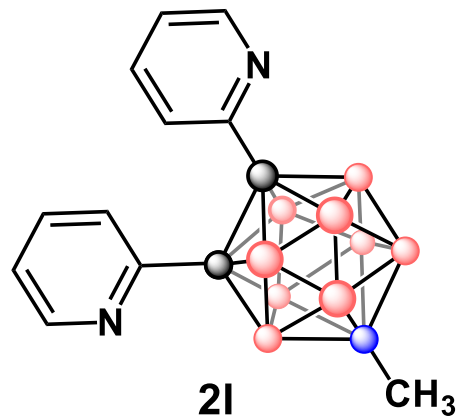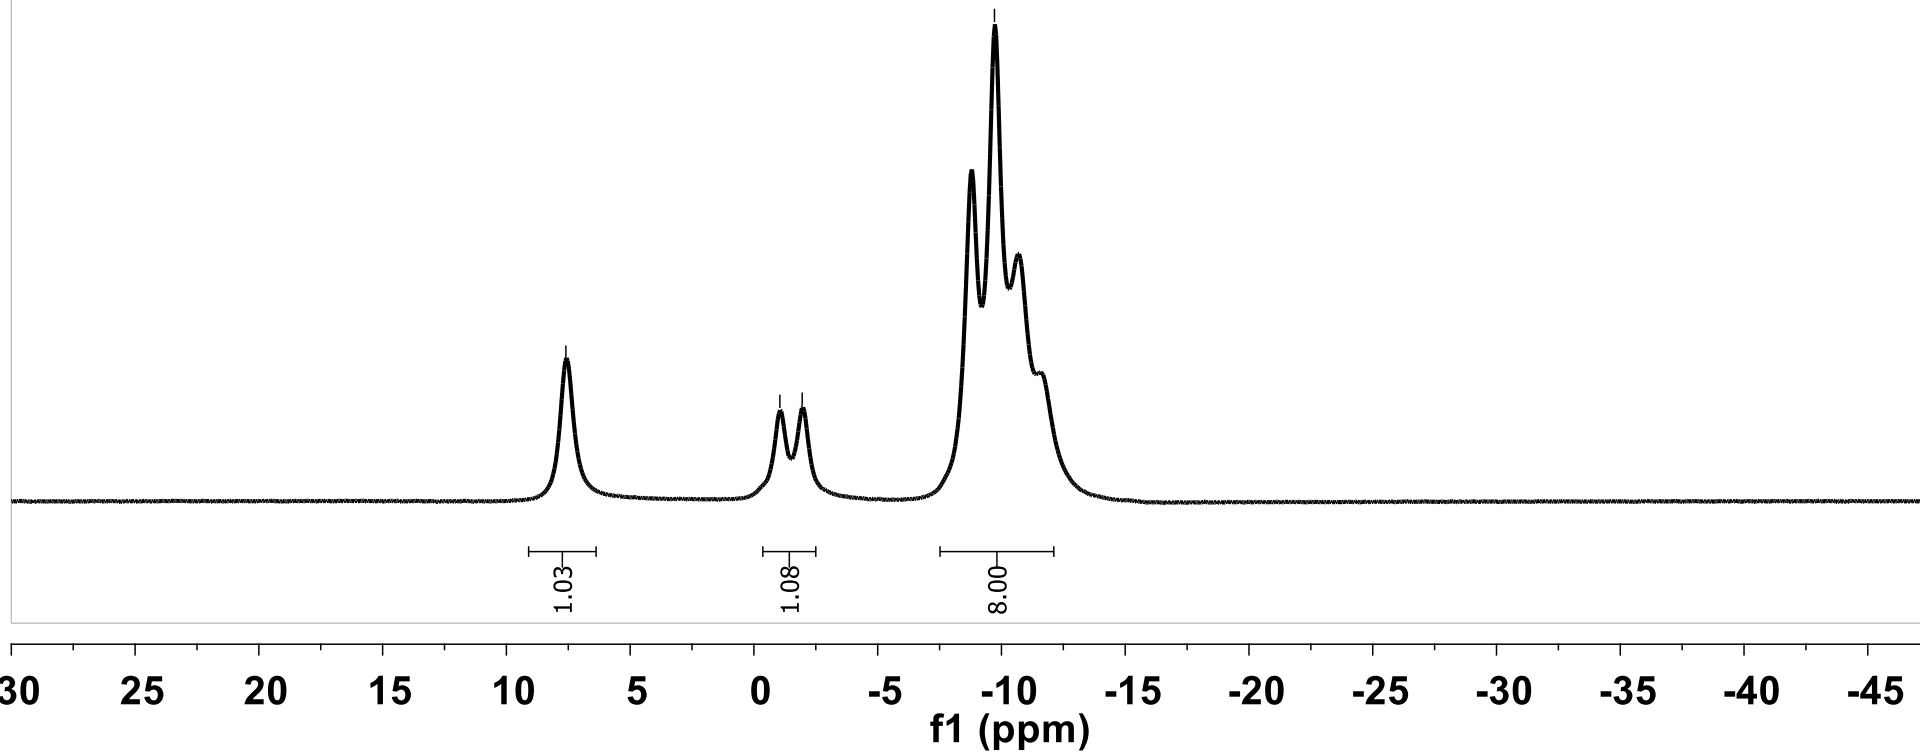

KA-I-178 11B{1H}  
11B acquisition-with H decoupling

— 7.60

— -1.49

— -9.23

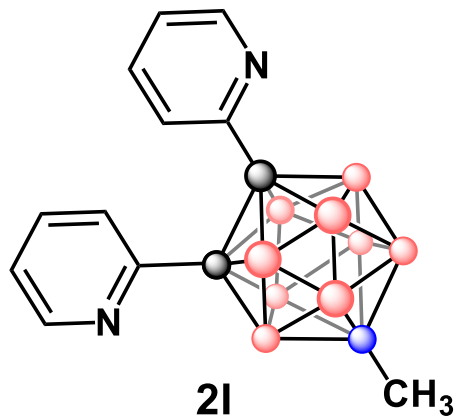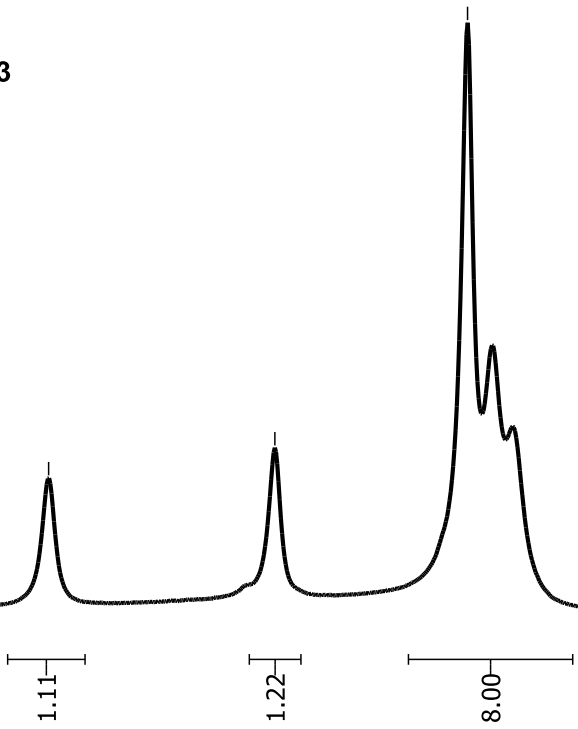

25 20 15 10 5 0 -5 -10 -15 -20 -25 -30 -35 -40 -45  
f1 (ppm)



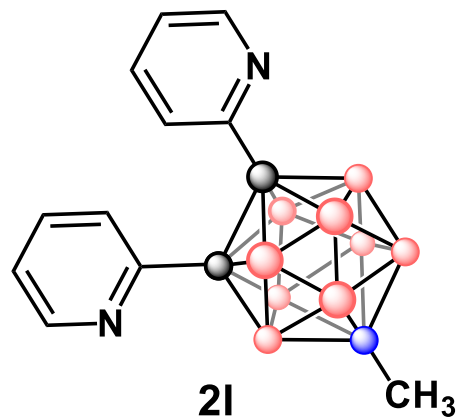

2I

CH<sub>3</sub>

149.38  
149.14  
148.58  
148.55

136.59  
136.58

125.58  
125.30  
124.15  
124.12

— 82.45

— 76.22

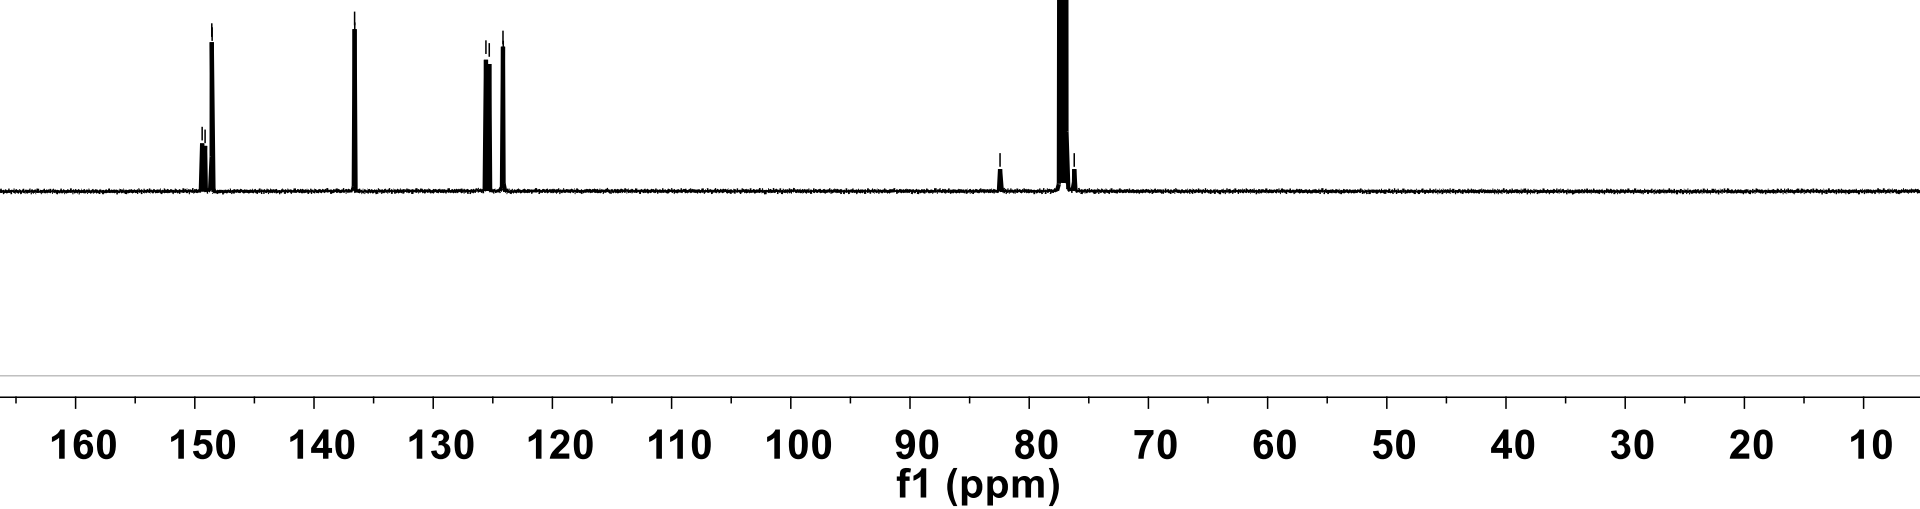

+EI Scan (rt: 4,996 min) Frag=70,0V 18\_1003\_KA-I-178,D

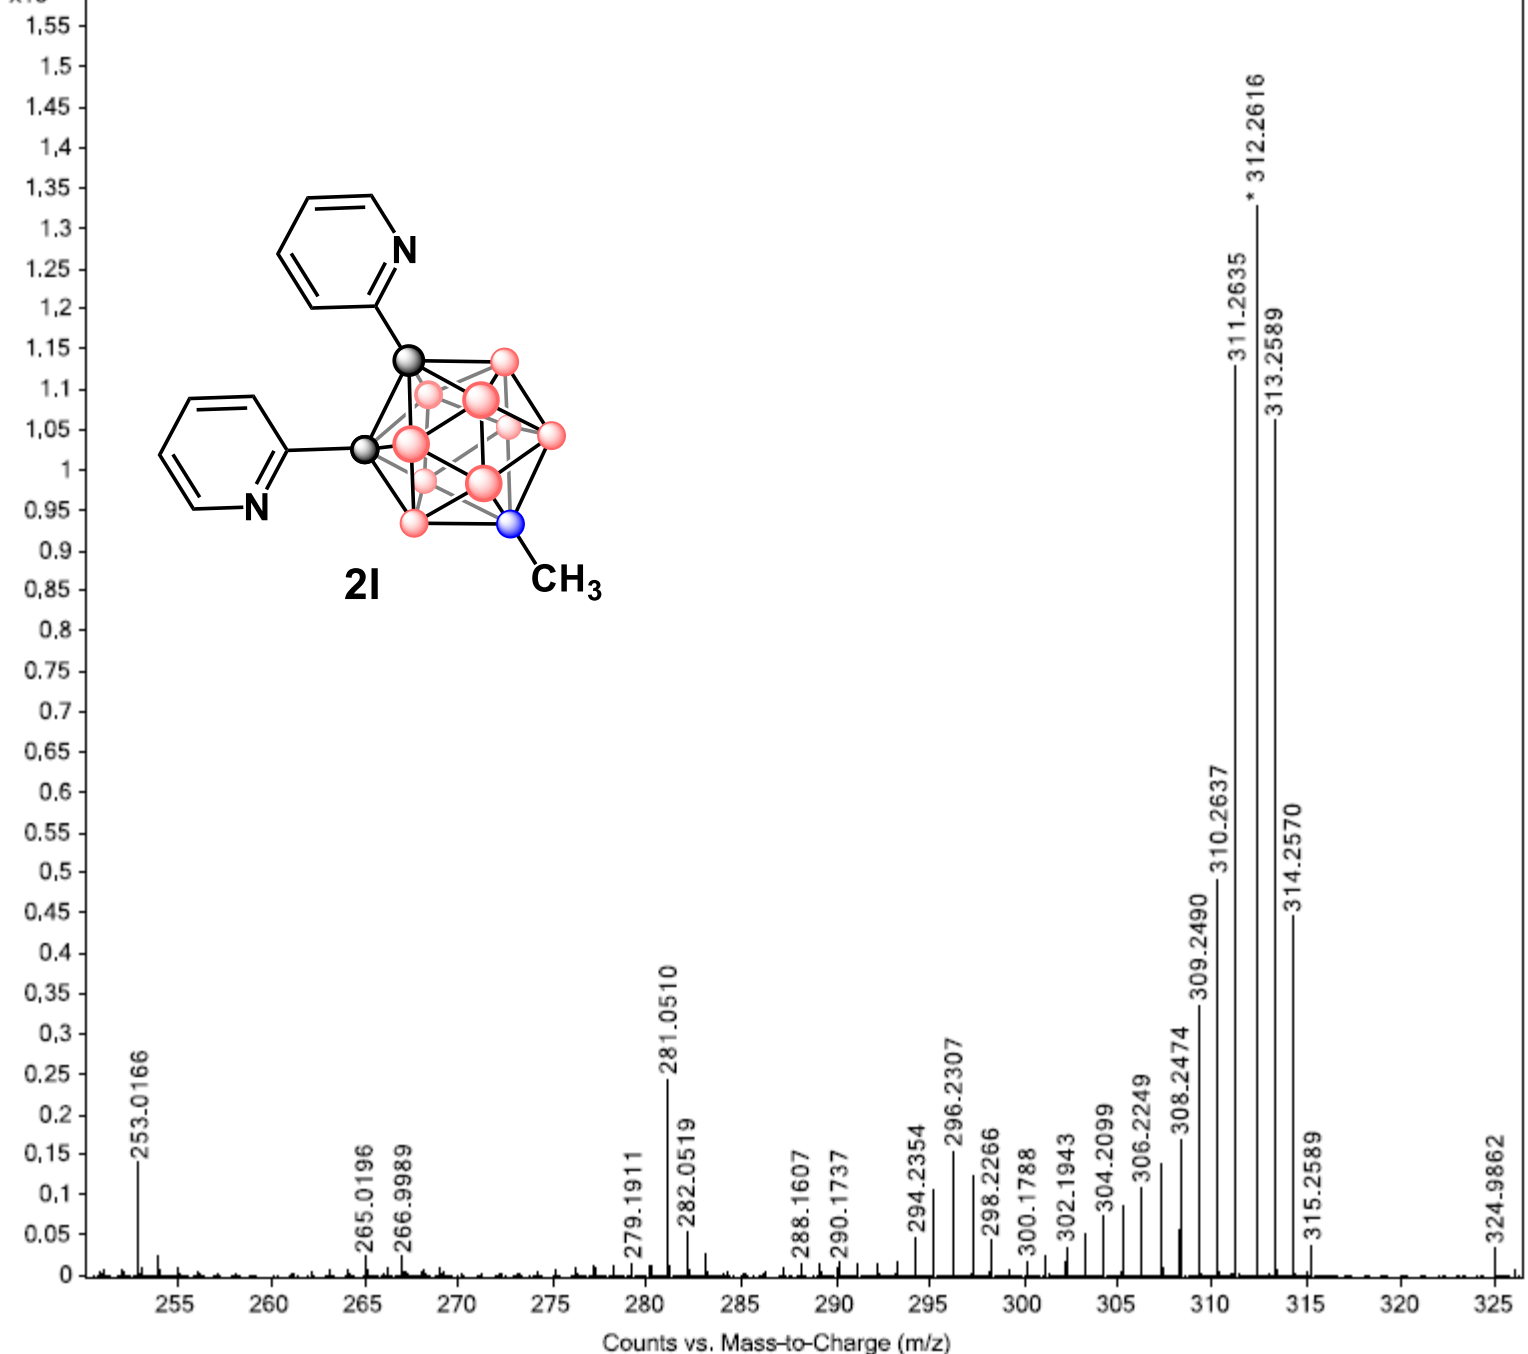

Supplement: NIHMS1516708-supplement-7.pdf [file NIHMS1516708-supplement-7.pdf]
